# Supplementary material for: Cardiac arrest: An interdisciplinary scoping review of the literature from 2019
Source: PubMed Central journal article supplement (PMC8244427; doi:10.1016/j.resplu.2020.100037), 2020-11-04
Supplement: mmc4.pdf [file mmc4.pdf]

| Article & Reviewer Information |                                            |                                             |           |                 |                   | Design (8 max) |   |   |   |   | Ethics (4 max) |   |   | Importance (5 max) |   |   | Impact (5 max) |   |   | Total score (22 max) |
|--------------------------------|--------------------------------------------|---------------------------------------------|-----------|-----------------|-------------------|----------------|---|---|---|---|----------------|---|---|--------------------|---|---|----------------|---|---|----------------------|
| Citation Title                 | Category (EPH, PRE, IN, PRO, PED, BSP, GL) | Type: Original Research (OR) or Review (RE) | PubMed ID | Editor Initials | Reviewer Initials | A              | B | C | D | E | A              | B | C | A                  | B | C | A              | B | C |                      |
| A caspase-6-cleaved fr         | BSP                                        | OR                                          | 31693684  | SG              | JL                | 2              | 1 | 1 | 1 | 1 | 2              | 1 | 1 | 0                  | 2 | 1 | 0              | 0 | 1 | 14                   |
| A caspase-6-cleaved fr         | BSP                                        | OR                                          | 31693684  | SG              | TM                | 4              | 1 | 1 | 1 | 1 | 2              | 1 | 1 | 2                  | 0 | 0 | 0              | 0 | 1 | 15                   |
| Adenosine 2A Recept            | BSP                                        | OR                                          | 31082918  | SG              | MC                | 4              | 1 | 1 | 1 | 1 | 2              | 1 | 1 | 2                  | 2 | 1 | 0              | 0 | 1 | 18                   |
| Adenosine 5'-Monoph            | BSP                                        | OR                                          | 31460871  | SG              | SC                | 1              | 1 | 1 | 1 | 0 | 2              | 1 | 1 | 0                  | 2 | 1 | 0              | 0 | 1 | 12                   |
| Adenoviral betaARKct           | BSP                                        | OR                                          | 30664574  | SG              | CA                | 3              | 1 | 1 | 1 | 1 | 2              | 1 | 1 | 2                  | 2 | 1 | 0              | 0 | 1 | 17                   |
| Akt1-mediated CPR α            | BSP                                        | OR                                          | 31398213  | SG              | MC                | 4              | 1 | 1 | 1 | 1 | 2              | 1 | 1 | 2                  | 2 | 1 | 0              | 0 | 1 | 18                   |
| Alterations in Respirat        | BSP                                        | OR                                          | 31549565  | SG              | TM                | 4              | 1 | 1 | 1 | 1 | 2              | 1 | 1 | 2                  | 2 | 1 | 2              | 0 | 1 | 20                   |
| Alterations in Respirat        | BSP                                        | OR                                          | 31549565  | SG              | CA                | 2              | 1 | 1 | 1 | 1 | 2              | 1 | 1 | 2                  | 2 | 1 | 2              | 2 | 1 | 20                   |
| Amiloride Alleviates ↑         | BSP                                        | OR                                          | 31272354  | SG              | MC                | 4              | 1 | 1 | 1 | 0 | 2              | 1 | 1 | 2                  | 2 | 1 | 0              | 0 | 1 | 17                   |
| Amiodarone exacerbate          | BSP                                        | OR                                          | 31864286  | SG              | MC                | 3              | 0 | 0 | 1 | 1 | 2              | 1 | 1 | 2                  | 2 | 1 | 2              | 2 | 1 | 19                   |
| Amplitude screening in         | BSP                                        | OR                                          | 30194021  | SG              | CA                | 1              | 1 | 1 | 1 | 1 | 2              | 1 | 1 | 2                  | 2 | 1 | 0              | 0 | 1 | 15                   |
| Annexin A1 Bioactive           | BSP                                        | OR                                          | 31258464  | SG              | MC                | 4              | 1 | 1 | 1 | 1 | 2              | 1 | 1 | 2                  | 2 | 1 | 2              | 0 | 1 | 20                   |
| Anti-Nogo-A antibody           | BSP                                        | OR                                          | 31746353  | SG              | MC                | 4              | 1 | 1 | 1 | 1 | 2              | 1 | 1 | 2                  | 2 | 1 | 0              | 2 | 1 | 20                   |
| Beneficial Effects of Iv       | BSP                                        | OR                                          | 31274829  | SG              | CA                | 4              | 1 | 1 | 1 | 1 | 2              | 1 | 1 | 0                  | 2 | 1 | 2              | 0 | 1 | 18                   |
| Biomechanical propert          | BSP                                        | OR                                          | 31726251  | SG              | CA                | 2              | 1 | 1 | 1 | 1 | 2              | 1 | 1 | 2                  | 2 | 1 | 0              | 0 | 1 | 16                   |
| Calcium/Calmodulin-I           | BSP                                        | OR                                          | 31520314  | SG              | JL                | 4              | 1 | 1 | 1 | 1 | 2              | 1 | 0 | 2                  | 2 | 1 | 0              | 0 | 1 | 17                   |
| Cerebral protection of         | BSP                                        | OR                                          | 31496652  | SG              | JL                | 3              | 1 | 1 | 1 | 0 | 2              | 1 | 1 | 2                  | 2 | 1 | 0              | 0 | 1 | 16                   |
| Cerebral protection of         | BSP                                        | OR                                          | 31496652  | SG              | TM                | 3              | 1 | 1 | 1 | 0 | 2              | 1 | 1 | 2                  | 2 | 1 | 0              | 0 | 1 | 16                   |
| Combined Treatment v           | BSP                                        | OR                                          | 31591692  | SG              | CA                | 3              | 1 | 1 | 1 | 1 | 2              | 1 | 1 | 2                  | 2 | 1 | 0              | 2 | 1 | 19                   |
| Comparative Regimen            | BSP                                        | OR                                          | 30113398  | SG              | CA                | 3              | 1 | 1 | 1 | 1 | 2              | 1 | 1 | 0                  | 2 | 1 | 0              | 2 | 1 | 17                   |
| Comparison of hemod            | BSP                                        | OR                                          | 31469891  | SG              | MC                | 4              | 0 | 1 | 1 | 1 | 2              | 1 | 1 | 2                  | 2 | 1 | 2              | 0 | 1 | 19                   |
| Conjunctival Microcin          | BSP                                        | OR                                          | 31876330  | SG              | MC                | 3              | 0 | 0 | 1 | 1 | 2              | 1 | 1 | 2                  | 2 | 1 | 2              | 2 | 0 | 18                   |
| CTL-derived granzyme           | BSP                                        | OR                                          | 31920929  | SG              | JL                | 4              | 1 | 1 | 1 | 1 | 2              | 1 | 0 | 2                  | 2 | 1 | 0              | 0 | 1 | 17                   |
| CTL-Derived Granzym            | BSP                                        | OR                                          | 31920929  | SG              | TM                | 3              | 1 | 1 | 1 | 1 | 2              | 1 | 1 | 2                  | 2 | 1 | 0              | 0 | 1 | 17                   |
| Cyclosporine A plus i          | BSP                                        | OR                                          | 31576483  | SG              | JL                | 4              | 1 | 1 | 1 | 0 | 2              | 1 | 1 | 2                  | 2 | 1 | 2              | 0 | 1 | 19                   |
| Differential effects of h      | BSP                                        | OR                                          | 30461327  | SG              | MC                | 4              | 1 | 1 | 1 | 1 | 2              | 1 | 1 | 2                  | 2 | 1 | 2              | 2 | 0 | 21                   |
| Differential effects on c      | BSP                                        | OR                                          | 31504369  | SG              | MC                | 2              | 0 | 0 | 1 | 1 | 2              | 0 | 1 | 0                  | 2 | 1 | 2              | 2 | 1 | 15                   |
| Dim light at night im          | BSP                                        | OR                                          | 30822422  | SG              | JL                | 4              | 1 | 1 | 1 | 1 | 2              | 1 | 1 | 0                  | 2 | 1 | 2              | 0 | 1 | 18                   |
| Dose-dependent Effects         | BSP                                        | OR                                          | 31258066  | SG              | SC                | 3              | 1 | 1 | 1 | 1 | 2              | 1 | 1 | 0                  | 2 | 1 | 0              | 0 | 1 | 15                   |
| Duration of cardiac arr        | BSP                                        | OR                                          | 31183772  | SG              | SC                | 3              | 1 | 1 | 1 | 1 | 2              | 1 | 1 | 0                  | 2 | 1 | 0              | 0 | 1 | 15                   |
| ECMO attenuates infla          | BSP                                        | OR                                          | 31253699  | SG              | CA                | 3              | 1 | 1 | 1 | 1 | 2              | 1 | 1 | 2                  | 2 | 1 | 2              | 0 | 1 | 19                   |
| Effect of Electrical vag       | BSP                                        | OR                                          | 30382532  | SG              | JL                | 4              | 1 | 1 | 1 | 1 | 2              | 1 | 1 | 0                  | 2 | 1 | 0              | 0 | 1 | 16                   |
| Effect of mild hypercap        | BSP                                        | OR                                          | 30612967  | SG              | CA                | 3              | 1 | 1 | 1 | 1 | 2              | 1 | 1 | 2                  | 2 | 1 | 2              | 0 | 1 | 19                   |
| Effect of mild hypothe         | BSP                                        | OR                                          | 31690318  | SG              | CA                | 3              | 1 | 1 | 1 | 1 | 2              | 1 | 1 | 2                  | 2 | 1 | 2              | 0 | 1 | 19                   |
| Effect of pralidoxime c        | BSP                                        | OR                                          | 31036784  | SG              | SC                | 3              | 1 | 1 | 1 | 1 | 2              | 1 | 1 | 0                  | 2 | 1 | 0              | 0 | 1 | 15                   |
| Electroacupuncture pre         | BSP                                        | OR                                          | 31476306  | SG              | MC                | 4              | 1 | 1 | 1 | 0 | 2              | 1 | 1 | 2                  | 2 | 1 | 0              | 0 | 0 | 16                   |
| Endovascular hypother          | BSP                                        | OR                                          | 31283936  | SG              | SC                | 4              | 1 | 1 | 1 | 1 | 2              | 1 | 1 | 0                  | 2 | 1 | 0              | 0 | 1 | 16                   |
| Esmolol for cardioprot         | BSP                                        | OR                                          | 31802327  | SG              | TM                | 4              | 1 | 1 | 1 | 1 | 2              | 1 | 1 | 2                  | 2 | 1 | 2              | 0 | 1 | 20                   |
| Esmolol for cardioprot         | BSP                                        | OR                                          | 31802327  | SG              | CA                | 3              | 1 | 1 | 1 | 1 | 2              | 1 | 1 | 2                  | 2 | 1 | 0              | 0 | 1 | 17                   |
| Exploration of the opti        | BSP                                        | OR                                          | 30554120  | SG              | JL                | 3              | 1 | 1 | 0 | 0 | 2              | 1 | 1 | 2                  | 2 | 1 | 0              | 0 | 1 | 15                   |
| Extracorporeal resuscit        | BSP                                        | OR                                          | 31482730  | SG              | CA                | 3              | 1 | 1 | 1 | 1 | 2              | 1 | 1 | 2                  | 2 | 1 | 0              | 0 | 1 | 17                   |
| Fingolimod Plays Rol           | BSP                                        | OR                                          | 31835656  | SG              | MC                | 4              | 1 | 1 | 1 | 1 | 2              | 1 | 1 | 2                  | 2 | 1 | 2              | 0 | 1 | 20                   |
| First-in-Human study           | BSP                                        | OR                                          | 31625480  | SG              | MC                | 4              | 1 | 1 | 1 | 0 | 2              | 1 | 1 | 0                  | 2 | 0 | 2              | 0 | 0 | 15                   |
| Functional Reclassific         | BSP                                        | OR                                          | 30578647  | TM              | TM                | 3              | 1 | 1 | 1 | 0 | 0              | 0 | 0 | 0                  | 0 | 1 | 0              | 0 | 1 | 8                    |
| Genetic inhibition of F        | BSP                                        | OR                                          | 30488977  | SG              | TM                | 4              | 1 | 1 | 1 | 1 | 2              | 1 | 1 | 0                  | 2 | 1 | 0              | 0 | 1 | 16                   |

|                          |     |    |          |    |    |   |   |   |   |   |   |   |   |   |   |   |   |   |   |    |
|--------------------------|-----|----|----------|----|----|---|---|---|---|---|---|---|---|---|---|---|---|---|---|----|
| Genetic inhibition of I  | BSP | OR | 30488977 | SG | CA | 2 | 1 | 1 | 1 | 1 | 2 | 1 | 1 | 2 | 1 | 1 | 0 | 0 | 1 | 15 |
| Growth differentiation   | BSP | OR | 31394153 | SG | SC | 2 | 1 | 1 | 1 | 1 | 2 | 1 | 1 | 0 | 2 | 1 | 0 | 0 | 1 | 14 |
| Heterotopic Ossificati   | BSP | OR | 31108046 | SG | CA | 1 | 0 | 0 | 1 | 0 | 0 | 0 | 0 | 0 | 0 | 0 | 0 | 0 | 2 |    |
| Hippocampus and base     | BSP | OR | 31005590 | SG | SC | 2 | 1 | 1 | 1 | 1 | 2 | 1 | 1 | 2 | 2 | 1 | 0 | 0 | 1 | 16 |
| Hypothermia Inhibits t   | BSP | OR | 31330290 | SG | MC | 4 | 0 | 1 | 1 | 1 | 2 | 1 | 1 | 2 | 2 | 1 | 0 | 0 | 1 | 17 |
| Hypothermic proportie    | BSP | OR | 31258715 | SG | CA | 3 | 1 | 1 | 1 | 1 | 2 | 1 | 1 | 2 | 2 | 1 | 2 | 0 | 1 | 19 |
| Imbalance of angiotens   | BSP | OR | 30816437 | SG | CA | 3 | 1 | 1 | 1 | 1 | 2 | 1 | 1 | 0 | 2 | 1 | 0 | 0 | 1 | 15 |
| Improvement in Outco     | BSP | OR | 30586713 | SG | CA | 3 | 1 | 1 | 1 | 1 | 2 | 1 | 1 | 2 | 2 | 1 | 2 | 0 | 1 | 19 |
| Increased Survival Tim   | BSP | OR | 29503242 | SG | MC | 4 | 0 | 0 | 1 | 1 | 2 | 1 | 1 | 2 | 2 | 1 | 2 | 0 | 1 | 18 |
| Intra-Arrest Administr   | BSP | OR | 31309111 | DC | KY | 4 | 1 | 1 | 1 | 1 | 2 | 1 | 1 | 2 | 2 | 1 | 2 | 2 | 1 | 22 |
| Intracerebroventricular  | BSP | OR | 31946798 | SG | MC | 4 | 0 | 0 | 1 | 0 | 2 | 1 | 0 | 2 | 2 | 1 | 0 | 0 | 1 | 14 |
| Intravenous transplants  | BSP | OR | 30482485 | SG | JL | 4 | 1 | 1 | 1 | 0 | 2 | 1 | 1 | 0 | 2 | 1 | 0 | 0 | 0 | 14 |
| Intravenous Transplant   | BSP | OR | 30482485 | SG | TM | 3 | 1 | 1 | 1 | 0 | 2 | 1 | 1 | 2 | 2 | 1 | 0 | 0 | 1 | 16 |
| Involvement of sphing    | BSP | OR | 30604190 | SG | MC | 3 | 0 | 0 | 1 | 1 | 2 | 1 | 1 | 2 | 2 | 1 | 2 | 2 | 1 | 19 |
| Low dose iloprost effe   | BSP | OR | 31945586 | SG | TM | 4 | 1 | 1 | 1 | 1 | 2 | 1 | 1 | 2 | 0 | 1 | 2 | 0 | 1 | 18 |
| Low-dose iloprost effe   | BSP | OR | 31945586 | SG | JL | 4 | 1 | 1 | 1 | 1 | 2 | 1 | 1 | 2 | 2 | 1 | 0 | 0 | 1 | 18 |
| Mechanisms of early g    | BSP | OR | 30908518 | SG | MC | 2 | 0 | 1 | 1 | 1 | 2 | 1 | 1 | 0 | 2 | 1 | 0 | 0 | 1 | 13 |
| Melatonin alleviates as  | BSP | OR | 31251935 | SG | MC | 4 | 0 | 1 | 1 | 0 | 2 | 1 | 1 | 2 | 2 | 1 | 0 | 0 | 0 | 15 |
| Mesenchymal stem cel     | BSP | OR | 31201814 | SG | SC | 3 | 1 | 1 | 1 | 1 | 2 | 1 | 1 | 0 | 2 | 1 | 0 | 0 | 1 | 15 |
| Mild hypothermia imp     | BSP | OR | 31428461 | SG | MC | 4 | 1 | 1 | 1 | 0 | 2 | 1 | 1 | 2 | 2 | 1 | 0 | 0 | 1 | 17 |
| Minocycline fails to ir  | BSP | OR | 31853446 | SG | TM | 4 | 1 | 1 | 1 | 1 | 2 | 1 | 1 | 2 | 2 | 1 | 2 | 0 | 1 | 20 |
| Minocycline fails to ir  | BSP | OR | 31853446 | SG | CA | 3 | 1 | 1 | 1 | 1 | 2 | 1 | 1 | 2 | 2 | 1 | 0 | 0 | 1 | 17 |
| miR-26a prevents neur    | BSP | OR | 30992390 | SG | CA | 3 | 1 | 1 | 1 | 1 | 2 | 1 | 1 | 0 | 2 | 1 | 0 | 0 | 1 | 15 |
| Mitochondrial dysfunc    | BSP | OR | 30854867 | SG | CA | 2 | 1 | 1 | 1 | 1 | 2 | 1 | 1 | 0 | 2 | 1 | 0 | 0 | 1 | 14 |
| Mitophagy in the Hipr    | BSP | OR | 31773373 | SG | CA | 2 | 1 | 1 | 1 | 1 | 2 | 1 | 1 | 2 | 2 | 1 | 0 | 0 | 1 | 16 |
| Monoacylglycerol Lip     | BSP | OR | 30431495 | SG | CA | 3 | 1 | 1 | 1 | 1 | 2 | 1 | 1 | 2 | 2 | 1 | 0 | 0 | 1 | 17 |
| Neuroprotection of Gli   | BSP | OR | 31946797 | SG | MC | 4 | 1 | 1 | 1 | 0 | 2 | 1 | 0 | 2 | 2 | 1 | 2 | 2 | 0 | 19 |
| Nitrite pharmacokineti   | BSP | OR | 31526855 | SG | JL | 4 | 1 | 1 | 1 | 1 | 2 | 1 | 1 | 2 | 2 | 1 | 0 | 0 | 1 | 18 |
| Noble gas neuroprotect   | BSP | OR | 31470983 | SG | MC | 4 | 1 | 1 | 1 | 1 | 2 | 1 | 1 | 2 | 2 | 1 | 2 | 2 | 1 | 22 |
| Novel Role of Carbon     | BSP | OR | 31030597 | SG | MC | 4 | 0 | 1 | 1 | 1 | 2 | 1 | 1 | 2 | 2 | 1 | 2 | 0 | 0 | 18 |
| Oxygen saturation and    | BSP | OR | 30792759 | SG | MC | 2 | 0 | 1 | 0 | 1 | 2 | 1 | 1 | 0 | 2 | 1 | 0 | 0 | 1 | 12 |
| Palmitic acid methyl e   | BSP | OR | 30514597 | SG | JL | 4 | 1 | 1 | 0 | 0 | 2 | 1 | 0 | 2 | 2 | 1 | 0 | 0 | 1 | 15 |
| PD98059 protects the     | BSP | OR | 31265854 | SG | SC | 3 | 1 | 1 | 1 | 1 | 2 | 1 | 1 | 0 | 2 | 1 | 0 | 0 | 1 | 15 |
| Perioperatively Inhaled  | BSP | OR | 31061920 | SG | CA | 3 | 1 | 1 | 1 | 1 | 2 | 1 | 1 | 2 | 2 | 1 | 2 | 0 | 1 | 19 |
| Pharmacokinetic effect   | BSP | OR | 30853153 | SG | MC | 4 | 1 | 1 | 1 | 1 | 2 | 1 | 1 | 2 | 2 | 1 | 2 | 0 | 1 | 20 |
| Pharmacokinetic effect   | BSP | OR | 30853153 | SG | MC | 4 | 1 | 1 | 1 | 1 | 2 | 1 | 1 | 2 | 2 | 1 | 2 | 0 | 0 | 19 |
| Post-TTM Rebound P       | BSP | OR | 31871429 | SG | CA | 2 | 1 | 1 | 1 | 1 | 2 | 1 | 1 | 2 | 2 | 1 | 2 | 0 | 1 | 18 |
| Pre-arrest hypothermia   | BSP | OR | 31530020 | SG | JL | 4 | 1 | 1 | 1 | 1 | 2 | 1 | 1 | 0 | 2 | 1 | 2 | 2 | 1 | 20 |
| Propofol does not affe   | BSP | OR | 31163372 | SG | CA | 2 | 1 | 1 | 1 | 1 | 2 | 1 | 1 | 2 | 2 | 1 | 2 | 0 | 1 | 18 |
| Protective effect of ext | BSP | OR | 31777541 | SG | CA | 3 | 1 | 1 | 1 | 1 | 2 | 1 | 1 | 2 | 2 | 1 | 2 | 0 | 1 | 19 |
| Protective effects of gh | BSP | OR | 31155149 | SG | MC | 4 | 1 | 1 | 1 | 0 | 2 | 1 | 1 | 2 | 2 | 1 | 0 | 0 | 1 | 17 |
| Relative Resilience of   | BSP | OR | 31396839 | SG | MC | 4 | 1 | 1 | 1 | 0 | 2 | 1 | 1 | 2 | 2 | 1 | 0 | 0 | 1 | 17 |
| Repetitive anodal trans  | BSP | OR | 30611705 | SG | MC | 4 | 1 | 1 | 1 | 1 | 2 | 1 | 1 | 2 | 2 | 1 | 0 | 0 | 1 | 18 |
| Search for Therapeutic   | BSP | OR | 31780928 | SG | MC | 2 | 0 | 0 | 1 | 1 | 2 | 1 | 1 | 2 | 2 | 1 | 2 | 2 | 1 | 18 |
| Selective aortic arch pe | BSP | OR | 31348400 | SG | MC | 4 | 1 | 1 | 1 | 1 | 2 | 1 | 1 | 2 | 2 | 1 | 2 | 2 | 1 | 22 |
| Selective beta-blocker   | BSP | OR | 30321461 | SG | MC | 4 | 1 | 1 | 1 | 1 | 2 | 1 | 0 | 2 | 2 | 1 | 2 | 2 | 1 | 21 |
| Semaphorin 3F Promc      | BSP | OR | 30877507 | SG | SC | 1 | 1 | 1 | 1 | 0 | 2 | 1 | 1 | 0 | 2 | 1 | 0 | 0 | 1 | 12 |
| Simultaneous cardiac ε   | BSP | OR | 31634345 | SG | MC | 3 | 0 | 0 | 1 | 0 | 2 | 1 | 1 | 2 | 2 | 1 | 0 | 0 | 1 | 14 |
| Single dose of 17B-est   | BSP | OR | 30471325 | SG | JL | 4 | 1 | 1 | 1 | 1 | 2 | 1 | 0 | 0 | 0 | 1 | 0 | 0 | 0 | 12 |
| Study of the effects of  | BSP | OR | 30747772 | SG | JL | 4 | 1 | 1 | 1 | 1 | 2 | 1 | 0 | 2 | 2 | 1 | 2 | 0 | 1 | 19 |
| Study of the Effects of  | BSP | OR | 30747772 | SG | SC | 4 | 1 | 1 | 1 | 1 | 2 | 1 | 1 | 0 | 2 | 1 | 0 | 0 | 1 | 16 |
| Suppression of Supero    | BSP | OR | 31725436 | SG | CA | 3 | 1 | 1 | 1 | 1 | 2 | 1 | 1 | 2 | 2 | 1 | 2 | 0 | 1 | 19 |
| The Effects of Pharma    | BSP | OR | 30986796 | SG | MC | 4 | 1 | 1 | 1 | 1 | 2 | 1 | 1 | 2 | 2 | 1 | 0 | 0 | 1 | 18 |

|                          |     |    |          |           |      |   |   |   |   |   |   |   |   |   |   |   |   |   |   |    |
|--------------------------|-----|----|----------|-----------|------|---|---|---|---|---|---|---|---|---|---|---|---|---|---|----|
| The incidence of acute   | BSP | OR | 31014141 | SG        | TM   | 3 | 1 | 1 | 1 | 1 | 2 | 1 | 1 | 2 | 0 | 1 | 0 | 0 | 1 | 15 |
| The influence of low-e   | BSP | OR | 31019122 | SG        | JL   | 3 | 1 | 1 | 1 | 0 | 2 | 1 | 1 | 2 | 2 | 1 | 0 | 0 | 0 | 15 |
| The influences of morp   | BSP | OR | 31747898 | SG        | JL   | 4 | 1 | 1 | 1 | 1 | 2 | 1 | 1 | 0 | 2 | 1 | 0 | 0 | 1 | 16 |
| The potassium channel    | BSP | OR | 29390872 | SG        | CA   | 2 | 1 | 1 | 1 | 1 | 2 | 1 | 1 | 0 | 2 | 0 | 0 | 0 | 1 | 13 |
| The roles of oxidative   | BSP | OR | 30951836 | SG        | CA   | 3 | 1 | 1 | 1 | 1 | 2 | 1 | 0 | 0 | 2 | 1 | 0 | 0 | 1 | 14 |
| Therapeutic hypotherm    | BSP | OR | 31331507 | SG        | CA   | 3 | 1 | 1 | 1 | 1 | 2 | 1 | 1 | 0 | 2 | 1 | 2 | 0 | 1 | 17 |
| Therapeutic hypotherm    | BSP | OR | 29739265 | SG        | TM   | 4 | 1 | 1 | 1 | 1 | 2 | 1 | 1 | 2 | 0 | 1 | 2 | 0 | 1 | 18 |
| Therapeutic hypotherm    | BSP | OR | 29739265 | SG        | JL   | 3 | 1 | 1 | 1 | 1 | 2 | 1 | 1 | 0 | 2 | 1 | 0 | 0 | 1 | 15 |
| Three-Dimensional Sh     | BSP | OR | 31737367 | SG        | TM   | 3 | 1 | 1 | 1 | 1 | 2 | 1 | 1 | 2 | 0 | 1 | 0 | 0 | 1 | 15 |
| Three-Dimensional Sh     | BSP | OR | 31737367 | SG        | CA   | 2 | 1 | 1 | 1 | 1 | 2 | 1 | 1 | 0 | 2 | 1 | 0 | 0 | 1 | 14 |
| Tissue damage in the l   | BSP | OR | 31336381 | SG        | SC   | 2 | 1 | 1 | 1 | 0 | 2 | 1 | 1 | 0 | 2 | 1 | 0 | 0 | 0 | 12 |
| Toll-like receptor 4 del | BSP | OR | 31369614 | SG        | CA   | 3 | 1 | 1 | 1 | 1 | 2 | 1 | 1 | 0 | 2 | 1 | 0 | 0 | 1 | 15 |
| Towards long-acting a    | BSP | OR | 30586629 | SG        | CA   | 3 | 1 | 1 | 1 | 1 | 2 | 1 | 1 | 2 | 2 | 1 | 0 | 0 | 1 | 17 |
| Towards personalized c   | BSP | OR | 31403405 | SG        | CA   | 3 | 1 | 1 | 1 | 1 | 2 | 1 | 0 | 0 | 2 | 1 | 0 | 0 | 1 | 14 |
| Transient hyperthermic   | BSP | OR | 31627241 | SG        | MC   | 3 | 0 | 0 | 1 | 1 | 0 | 1 | 1 | 2 | 2 | 1 | 0 | 0 | 1 | 13 |
| Two-site regional oxy    | BSP | OR | 30820870 | SG        | SC   | 3 | 1 | 1 | 1 | 1 | 2 | 1 | 1 | 0 | 2 | 1 | 0 | 0 | 0 | 14 |
| Ultrastructural Charact  | BSP | OR | 31631775 | SG        | JL   | 3 | 1 | 1 | 1 | 1 | 2 | 1 | 1 | 0 | 0 | 0 | 0 | 0 | 1 | 12 |
| Use of resuscitative ba  | BSP | OR | 31121206 | SG        | MC   | 3 | 1 | 1 | 1 | 1 | 2 | 1 | 1 | 2 | 2 | 1 | 2 | 2 | 1 | 21 |
| Validation of spectral c | BSP | OR | 31656658 | SG        | CA   | 2 | 1 | 1 | 1 | 1 | 2 | 1 | 1 | 2 | 2 | 1 | 0 | 0 | 1 | 16 |
| Xuezhikang improves      | BSP | OR | 30953818 | SG        | SC   | 3 | 1 | 1 | 1 | 0 | 2 | 1 | 1 | 2 | 2 | 1 | 0 | 0 | 1 | 16 |
| 1A Lethal Blow to the    | EPH | OR | 31277792 | MPB/MABC  | EM   | 1 | 1 | 1 | 1 | 1 | 0 | 1 | 1 | 0 | 2 | 1 | 2 | 0 | 1 | 13 |
| A 5-year change of kno   | EPH | OR | 30730932 | MPB, MABC | SB   | 2 | 1 | 1 | 1 | 1 | 2 | 1 | 1 | 0 | 2 | 1 | 2 | 0 | 1 | 16 |
| A common indel poly      | EPH | OR | 31220685 | MPB/MABC  | EM   | 2 | 1 | 1 | 1 | 1 | 2 | 1 | 1 | 0 | 2 | 1 | 2 | 0 | 0 | 15 |
| A comparative study o    | EPH | OR | 31623585 | MPB/MABC  | YE   | 2 | 1 | 1 | 1 | 1 | 2 | 1 | 1 | 0 | 2 | 1 | 0 | 0 | 1 | 14 |
| A five-year retrospectiv | EPH | OR | 29932346 | MPB/MABC  | JW   | 2 | 1 | 1 | 1 | 1 | 2 | 0 | 1 | 0 | 2 | 1 | 2 | 0 | 0 | 14 |
| A Hybrid Risk Assess     | EPH | OR | 31491657 | MPB/MABC  | MPB  | 1 | 1 | 1 | 1 | 0 | 0 | 0 | 1 | 0 | 2 | 1 | 0 | 0 | 1 | 9  |
| A laboratory-derived e   | EPH | OR | 31424605 | MPB/MABC  | EM   | 2 | 1 | 1 | 1 | 1 | 2 | 1 | 0 | 0 | 0 | 1 | 0 | 0 | 1 | 11 |
| A local neighborhood     | EPH | OR | 31580910 | MABC      | MABC | 2 | 1 | 1 | 1 | 1 | 2 | 1 | 1 | 0 | 2 | 1 | 2 | 2 | 1 | 18 |
| A mediation analysis c   | EPH | OR | 31034486 | MBC/MABC  | SB   | 2 | 1 | 1 | 1 | 1 | 2 | 1 | 1 | 0 | 2 | 1 | 2 | 2 | 1 | 18 |
| A multidisciplinary ap   | EPH | OR | 31166220 | MPB/MABC  | EM   | 2 | 1 | 1 | 1 | 1 | 2 | 1 | 1 | 0 | 2 | 1 | 2 | 2 | 1 | 18 |
| A Nationwide Investig    | EPH | OR | 30385384 | MPB/MABC  | EM   | 2 | 1 | 1 | 1 | 1 | 2 | 1 | 1 | 0 | 0 | 1 | 0 | 0 | 1 | 12 |
| A new approach to pre    | EPH | OR | 31320952 | MPB/MABC  | YE   | 2 | 1 | 1 | 1 | 1 | 2 | 1 | 1 | 0 | 2 | 1 | 0 | 0 | 1 | 14 |
| A novel DPP6 variant     | EPH | OR | 31476289 | MPB/MABC  | JW   | 3 | 1 | 1 | 1 | 1 | 2 | 1 | 1 | 0 | 2 | 1 | 0 | 0 | 1 | 15 |
| A novel familial trunc   | EPH | OR | 30118858 | MPB/MABC  | MPB  | 1 | 1 | 0 | 1 | 0 | 0 | 0 | 1 | 0 | 2 | 1 | 0 | 0 | 1 | 8  |
| A randomised controll    | EPH | OR | 30988532 | MPB/MABC  | JW   | 3 | 1 | 1 | 1 | 1 | 0 | 1 | 1 | 0 | 2 | 1 | 2 | 2 | 0 | 16 |
| A randomised controll    | EPH | OR | 31151481 | MABC      | MABC | 4 | 1 | 1 | 1 | 1 | 2 | 1 | 1 | 0 | 2 | 1 | 2 | 2 | 1 | 20 |
| A video-based training   | EPH | OR | 30209672 | MBC/MABC  | SB   | 1 | 1 | 1 | 1 | 1 | 2 | 1 | 1 | 0 | 2 | 1 | 0 | 0 | 0 | 12 |
| Accuracy of Automatic    | EPH | OR | 31706968 | MPB/MABC  | EM   | 1 | 1 | 1 | 1 | 1 | 2 | 1 | 1 | 0 | 2 | 1 | 0 | 0 | 1 | 13 |
| Actual resuscitation ac  | EPH | OR | 31201883 | MPB/MABC  | JW   | 1 | 1 | 1 | 1 | 1 | 2 | 1 | 1 | 0 | 2 | 1 | 2 | 2 | 1 | 17 |
| Adult in-hospital cardi  | EPH | OR | 31075290 | MPB/MABC  | EM   | 1 | 1 | 1 | 1 | 1 | 2 | 1 | 1 | 0 | 2 | 1 | 0 | 0 | 1 | 13 |
| Age-associated outcom    | EPH | OR | 31206587 | MPB, MABC | SB   | 2 | 1 | 1 | 1 | 1 | 2 | 1 | 1 | 0 | 2 | 1 | 2 | 0 | 1 | 16 |
| An association between   | EPH | OR | 31634617 | MABC      | MABC | 2 | 1 | 1 | 1 | 1 | 2 | 1 | 1 | 0 | 2 | 1 | 2 | 2 | 1 | 18 |
| An audio-visual review   | EPH | OR | 31734218 | MABC      | MABC | 4 | 1 | 1 | 1 | 1 | 2 | 1 | 1 | 0 | 2 | 1 | 2 | 2 | 1 | 20 |
| An intelligent warning   | EPH | OR | 31416562 | MPB/MABC  | YE   | 2 | 1 | 1 | 1 | 1 | 0 | 1 | 1 | 2 | 2 | 1 | 0 | 0 | 1 | 14 |
| Analysis of a sustainec  | EPH | OR | 31210452 | MPB/MABC  | EM   | 1 | 1 | 1 | 1 | 1 | 2 | 1 | 1 | 0 | 2 | 1 | 2 | 0 | 1 | 15 |
| Antipsychotics and the   | EPH | OR | 31743435 | MBC/MABC  | SB   | 2 | 1 | 1 | 1 | 1 | 0 | 0 | 0 | 0 | 2 | 1 | 2 | 2 | 1 | 14 |
| App-based Learning as    | EPH | OR | 30105946 | MPB/MABC  | EM   | 1 | 1 | 1 | 0 | 0 | 2 | 1 | 1 | 2 | 0 | 0 | 0 | 0 | 1 | 10 |
| Association between a    | EPH | OR | 31578416 | MPB/MABC  | YE   | 2 | 1 | 1 | 1 | 1 | 2 | 1 | 1 | 0 | 2 | 1 | 0 | 0 | 1 | 14 |
| Association between c    | EPH | OR | 30677440 | MPB, MABC | SC   | 2 | 1 | 1 | 1 | 1 | 2 | 1 | 1 | 2 | 2 | 1 | 0 | 0 | 1 | 16 |
| Association Between I    | EPH | OR | 31822122 | MPB/MABC  | JW   | 2 | 1 | 1 | 1 | 1 | 2 | 1 | 1 | 2 | 2 | 1 | 2 | 2 | 1 | 20 |
| Association of ambien    | EPH | OR | 31527786 | MPB/MABC  | MPB  | 2 | 1 | 1 | 1 | 1 | 2 | 1 | 1 | 0 | 2 | 1 | 2 | 0 | 1 | 16 |
| Association of health i  | EPH | OR | 30639790 | MPB/MABC  | YE   | 2 | 1 | 1 | 1 | 1 | 2 | 1 | 1 | 0 | 2 | 1 | 0 | 0 | 1 | 14 |
| Association of hemogl    | EPH | OR | 31296079 | MPB/MABC  | EM   | 2 | 1 | 1 | 1 | 1 | 2 | 1 | 1 | 0 | 2 | 1 | 0 | 0 | 1 | 14 |

|                          |     |    |          |           |      |   |   |   |   |   |   |   |   |   |   |   |   |   |   |    |
|--------------------------|-----|----|----------|-----------|------|---|---|---|---|---|---|---|---|---|---|---|---|---|---|----|
| Associations between c   | EPH | OR | 31217990 | MPB, MABC | SB   | 2 | 1 | 1 | 1 | 1 | 2 | 1 | 1 | 0 | 2 | 1 | 2 | 0 | 1 | 16 |
| Attitudes to Cardiopul   | EPH | OR | 30917733 | MPB/MABC  | YE   | 1 | 1 | 1 | 1 | 1 | 2 | 1 | 1 | 2 | 2 | 1 | 2 | 2 | 1 | 19 |
| Automated External D     | EPH | OR | 30111222 | MBC/MABC  | SB   | 4 | 1 | 1 | 1 | 1 | 2 | 1 | 1 | 0 | 2 | 1 | 2 | 2 | 1 | 20 |
| Automated external de    | EPH | OR | 31658139 | MABC      | MABC | 2 | 1 | 1 | 1 | 1 | 2 | 1 | 1 | 0 | 2 | 1 | 2 | 2 | 1 | 18 |
| Automated extraction c   | EPH | OR | 31160009 | MPB/MABC  | EM   | 2 | 1 | 1 | 1 | 1 | 2 | 1 | 1 | 0 | 2 | 1 | 2 | 0 | 0 | 15 |
| Avalanche victims in c   | EPH | OR | 31185258 | MPB/MABC  | EM   | 2 | 1 | 1 | 1 | 1 | 2 | 1 | 1 | 0 | 2 | 1 | 0 | 0 | 1 | 14 |
| Basic life support by c  | EPH | OR | 30976436 | MPB/MABC  | EM   | 2 | 1 | 1 | 1 | 1 | 2 | 1 | 1 | 0 | 0 | 1 | 0 | 0 | 1 | 12 |
| Basic life support train | EPH | OR | 31189497 | MPB/MABC  | YE   | 4 | 1 | 1 | 1 | 1 | 2 | 1 | 1 | 0 | 2 | 1 | 2 | 0 | 1 | 18 |
| Basic life support train | EPH | OR | 31189497 | MBC/MABC  | SB   | 4 | 1 | 1 | 1 | 1 | 2 | 1 | 1 | 0 | 2 | 1 | 2 | 2 | 1 | 20 |
| Bystander automated e    | EPH | OR | 30790694 | MPB, MABC | SC   | 2 | 1 | 1 | 1 | 1 | 2 | 1 | 1 | 2 | 2 | 1 | 0 | 0 | 1 | 16 |
| Bystander cardiopulmc    | EPH | OR | 30380021 | MBC/MABC  | SB   | 2 | 1 | 1 | 1 | 1 | 2 | 1 | 1 | 0 | 2 | 1 | 2 | 2 | 1 | 18 |
| Bystander-initiated Co   | EPH | OR | 31639461 | MPB/MABC  | EM   | 2 | 1 | 1 | 1 | 1 | 2 | 1 | 1 | 0 | 2 | 1 | 0 | 0 | 1 | 14 |
| Cardiac arrest as an ag  | EPH | OR | 29856229 | MPB/MABC  | YE   | 2 | 1 | 1 | 1 | 1 | 2 | 0 | 1 | 0 | 2 | 1 | 2 | 0 | 1 | 15 |
| Cardiopulmonary resu:    | EPH | OR | 30134008 | MPB/MABC  | YE   | 1 | 1 | 1 | 1 | 1 | 2 | 1 | 1 | 0 | 2 | 1 | 2 | 2 | 1 | 17 |
| Cardiopulmonary Rest     | EPH | OR | 31840239 | MPB/MABC  | JW   | 1 | 1 | 1 | 1 | 1 | 2 | 0 | 1 | 0 | 2 | 1 | 0 | 0 | 1 | 12 |
| Cardiopulmonary resu:    | EPH | OR | 30639787 | MPB/MABC  | JW   | 2 | 1 | 1 | 1 | 1 | 2 | 1 | 1 | 0 | 2 | 1 | 0 | 0 | 0 | 13 |
| Cardiorespiratory fitne  | EPH | OR | 31422363 | MPB, MABC | SB   | 2 | 1 | 1 | 1 | 1 | 2 | 1 | 1 | 0 | 2 | 1 | 2 | 0 | 1 | 16 |
| Cardiovascular effects   | EPH | OR | 30772188 | MPB/MABC  | JW   | 1 | 1 | 0 | 1 | 0 | 0 | 1 | 0 | 0 | 2 | 1 | 2 | 0 | 0 | 9  |
| Cardiovascular Outcon    | EPH | OR | 31581860 | MPB/MABC  | MPB  | 2 | 1 | 1 | 1 | 1 | 2 | 1 | 1 | 0 | 2 | 1 | 0 | 2 | 1 | 16 |
| Certified Basic Life St  | EPH | OR | 31490866 | MPB/MABC  | MPB  | 1 | 1 | 1 | 1 | 1 | 2 | 0 | 1 | 0 | 2 | 1 | 0 | 2 | 1 | 14 |
| Characteristics of neigl | EPH | OR | 29961881 | MPB/MABC  | MPB  | 2 | 1 | 1 | 1 | 1 | 2 | 1 | 1 | 0 | 2 | 1 | 0 | 2 | 1 | 16 |
| Characteristics of Out   | EPH | OR | 31803370 | MABC      | MABC | 2 | 1 | 1 | 1 | 1 | 2 | 1 | 1 | 0 | 2 | 1 | 2 | 2 | 1 | 18 |
| Characteristics of Subj  | EPH | OR | 31551291 | MPB/MABC  | EM   | 2 | 1 | 1 | 1 | 1 | 2 | 1 | 0 | 0 | 2 | 1 | 0 | 0 | 1 | 13 |
| Clinical characteristics | EPH | OR | 30190239 | MPB/MABC  | YE   | 2 | 1 | 1 | 1 | 1 | 2 | 0 | 1 | 0 | 2 | 1 | 2 | 0 | 1 | 15 |
| Clinical risk predictor  | EPH | OR | 31888507 | MBC/MABC  | SB   | 1 | 1 | 1 | 1 | 1 | 2 | 1 | 1 | 0 | 2 | 1 | 2 | 0 | 1 | 15 |
| Clinician Perspectives   | EPH | OR | 30624280 | MPB/MABC  | YE   | 1 | 1 | 1 | 1 | 1 | 2 | 1 | 1 | 2 | 2 | 1 | 2 | 0 | 1 | 17 |
| Combination of probl     | EPH | OR | 31151450 | MPB/MABC  | JW   | 4 | 1 | 1 | 1 | 1 | 2 | 1 | 1 | 0 | 2 | 1 | 2 | 2 | 1 | 20 |
| Community-Wide Dis       | EPH | OR | 30612478 | MPB/MABC  | JW   | 2 | 1 | 1 | 1 | 1 | 2 | 0 | 1 | 0 | 2 | 1 | 2 | 2 | 1 | 17 |
| Comparable Survival i    | EPH | OR | 30896453 | MPB/MABC  | EM   | 2 | 1 | 1 | 1 | 1 | 2 | 0 | 1 | 0 | 2 | 1 | 0 | 0 | 1 | 13 |
| Comparative evaluatio    | EPH | OR | 30958836 | MABC      | MABC | 4 | 1 | 1 | 1 | 1 | 2 | 1 | 1 | 0 | 2 | 1 | 2 | 2 | 1 | 20 |
| Comparative evaluatio    | EPH | OR | 30958836 | MPB, MABC | SB   | 4 | 1 | 1 | 1 | 1 | 2 | 1 | 1 | 0 | 2 | 1 | 2 | 0 | 1 | 18 |
| Comparison of Long-T     | EPH | OR | 31103131 | MPB/MABC  | EM   | 2 | 1 | 1 | 1 | 1 | 2 | 1 | 1 | 2 | 2 | 1 | 0 | 0 | 1 | 16 |
| Contactless cardiac arr  | EPH | OR | 31304398 | MPB/MABC  | YE   | 3 | 1 | 1 | 1 | 1 | 2 | 1 | 1 | 0 | 2 | 1 | 0 | 0 | 1 | 15 |
| Cost effectiveness and   | EPH | OR | 30922936 | MPB/MABC  | YE   | 2 | 1 | 1 | 1 | 1 | 2 | 0 | 1 | 0 | 2 | 1 | 2 | 0 | 1 | 15 |
| Cost-effectiveness of a  | EPH | OR | 31345972 | MPB/MABC  | EM   | 1 | 1 | 1 | 1 | 1 | 2 | 1 | 1 | 0 | 0 | 1 | 0 | 0 | 1 | 11 |
| Cost-utility of extracor | EPH | OR | 30716427 | MPB/MABC  | YE   | 2 | 1 | 1 | 1 | 1 | 2 | 0 | 1 | 2 | 2 | 1 | 0 | 0 | 1 | 15 |
| CPRrural                 | EPH | OR | 30638192 | MPB, MABC | SB   | 2 | 1 | 1 | 1 | 1 | 2 | 1 | 1 | 0 | 2 | 1 | 2 | 0 | 1 | 16 |
| Culture and personal it  | EPH | OR | 31878920 | MBC/MABC  | SB   | 1 | 1 | 1 | 1 | 1 | 2 | 1 | 1 | 0 | 2 | 1 | 2 | 0 | 1 | 15 |
| Current state of knowl   | EPH | OR | 31752855 | MABC      | MABC | 1 | 1 | 1 | 1 | 1 | 2 | 1 | 1 | 0 | 2 | 1 | 2 | 2 | 1 | 17 |
| Data concerning AED      | EPH | OR | 31193077 | MPB, MABC | SB   | 1 | 1 | 1 | 1 | 1 | 0 | 0 | 0 | 0 | 2 | 1 | 2 | 0 | 0 | 10 |
| Depression and anxiety   | EPH | OR | 30745287 | MPB/MABC  | JW   | 2 | 1 | 1 | 1 | 1 | 2 | 1 | 1 | 0 | 2 | 1 | 0 | 0 | 1 | 14 |
| Determining the Motiv    | EPH | OR | 30536860 | MPB/MABC  | EM   | 1 | 1 | 1 | 1 | 1 | 2 | 1 | 1 | 0 | 2 | 1 | 0 | 0 | 1 | 13 |
| Development of a Med     | EPH | OR | 31249769 | MPB, MABC | SB   | 1 | 1 | 1 | 1 | 1 | 0 | 0 | 0 | 0 | 2 | 1 | 2 | 0 | 0 | 10 |
| Development, validati    | EPH | OR | 31870420 | MPB/MABC  | JW   | 3 | 1 | 1 | 1 | 1 | 2 | 1 | 1 | 0 | 2 | 1 | 2 | 0 | 1 | 17 |
| Differences in duration  | EPH | OR | 30708073 | MPB/MABC  | EM   | 2 | 1 | 1 | 1 | 1 | 2 | 1 | 1 | 0 | 2 | 1 | 2 | 0 | 1 | 16 |
| Differential outcomes i  | EPH | OR | 30965094 | MPB/MABC  | EM   | 2 | 1 | 1 | 1 | 1 | 2 | 1 | 1 | 0 | 2 | 1 | 0 | 0 | 1 | 14 |
| Do Patients Suffering    | EPH | OR | 31584640 | MPB/MABC  | JW   | 2 | 1 | 1 | 1 | 1 | 2 | 0 | 1 | 2 | 2 | 1 | 2 | 2 | 1 | 19 |
| Does occurrence during   | EPH | OR | 31238153 | MPB, MABC | SC   | 2 | 1 | 1 | 1 | 1 | 2 | 1 | 1 | 0 | 2 | 1 | 0 | 0 | 1 | 14 |
| Dyadic effects of type   | EPH | OR | 31752502 | MPB/MABC  | MPB  | 2 | 1 | 1 | 1 | 1 | 2 | 1 | 1 | 0 | 2 | 1 | 0 | 0 | 1 | 14 |
| Early warning score ad   | EPH | OR | 30588704 | MABC      | MABC | 2 | 1 | 1 | 1 | 1 | 2 | 1 | 1 | 0 | 2 | 1 | 2 | 2 | 1 | 18 |
| ECG derived Cheyne-St    | EPH | OR | 30340809 | MPB/MABC  | MPB  | 2 | 1 | 1 | 1 | 1 | 2 | 1 | 1 | 0 | 2 | 1 | 0 | 0 | 1 | 14 |
| ECG left ventricular h   | EPH | OR | 30293667 | MPB/MABC  | MPB  | 2 | 1 | 1 | 1 | 1 | 2 | 1 | 1 | 0 | 2 | 1 | 0 | 2 | 1 | 16 |
| Effect of cancer history | EPH | OR | 30771449 | MPB/MABC  | YE   | 2 | 1 | 1 | 1 | 1 | 2 | 0 | 1 | 0 | 2 | 1 | 2 | 0 | 1 | 15 |

|                           |     |    |          |           |      |   |   |   |   |   |   |   |   |   |   |   |   |   |   |    |
|---------------------------|-----|----|----------|-----------|------|---|---|---|---|---|---|---|---|---|---|---|---|---|---|----|
| Effect of estimated glo   | EPH | OR | 31299221 | MPB/MABC  | JW   | 2 | 1 | 1 | 1 | 1 | 2 | 0 | 1 | 2 | 2 | 1 | 2 | 2 | 1 | 19 |
| Effect of Face-to-Face    | EPH | OR | 31734702 | MBC/MABC  | SB   | 4 | 1 | 1 | 1 | 1 | 2 | 1 | 1 | 0 | 2 | 1 | 2 | 2 | 1 | 20 |
| Effect of hypertension    | EPH | OR | 30025949 | MBC/MABC  | SB   | 1 | 1 | 1 | 1 | 1 | 2 | 1 | 1 | 0 | 2 | 1 | 2 | 2 | 1 | 17 |
| Effect of Prophylactic    | EPH | OR | 30781870 | MPB/MABC  | EM   | 2 | 1 | 1 | 1 | 1 | 2 | 1 | 1 | 0 | 0 | 1 | 0 | 0 | 1 | 12 |
| Effect of Public Repor    | EPH | OR | 30998398 | MPB/MABC  | YE   | 2 | 1 | 1 | 1 | 1 | 0 | 0 | 1 | 0 | 2 | 1 | 0 | 0 | 1 | 11 |
| Effect of real-time visu  | EPH | OR | 31189674 | MPB/MABC  | YE   | 4 | 1 | 1 | 1 | 1 | 2 | 1 | 1 | 0 | 2 | 1 | 2 | 0 | 1 | 18 |
| Effect of vertical locati | EPH | OR | 30953711 | MPB, MABC | SC   | 2 | 1 | 1 | 1 | 1 | 2 | 1 | 1 | 2 | 2 | 1 | 0 | 2 | 1 | 18 |
| Effectiveness of Basic    | EPH | OR | 29361872 | MPB/MABC  | EM   | 1 | 1 | 1 | 1 | 1 | 2 | 1 | 1 | 2 | 2 | 1 | 0 | 0 | 1 | 15 |
| Effects of native langu   | EPH | OR | 31061026 | MPB/MABC  | JW   | 3 | 1 | 1 | 1 | 1 | 2 | 1 | 1 | 0 | 2 | 1 | 0 | 0 | 1 | 15 |
| Emergency response fa     | EPH | OR | 28615216 | MABC      | MABC | 1 | 1 | 1 | 1 | 1 | 2 | 1 | 1 | 0 | 2 | 1 | 2 | 2 | 1 | 17 |
| Epidemiological inves     | EPH | OR | 30691418 | MBC/MABC  | SB   | 2 | 1 | 1 | 1 | 1 | 2 | 1 | 1 | 0 | 2 | 1 | 2 | 2 | 1 | 18 |
| Epidemiological inves     | EPH | OR | 30691418 | MPB, MABC | SB   | 2 | 1 | 1 | 1 | 1 | 2 | 1 | 1 | 0 | 2 | 1 | 2 | 0 | 0 | 15 |
| Epidemiology of Out-t     | EPH | OR | 29684654 | MPB/MABC  | EM   | 1 | 1 | 1 | 1 | 1 | 2 | 1 | 1 | 0 | 2 | 1 | 0 | 0 | 1 | 13 |
| Epidemiology of pre-h     | EPH | OR | 31352680 | MPB/MABC  | JW   | 2 | 1 | 1 | 1 | 1 | 2 | 1 | 1 | 0 | 2 | 1 | 2 | 2 | 1 | 18 |
| Epidemiology, etiolog     | EPH | OR | 31502289 | MPB/MABC  | YE   | 2 | 1 | 1 | 1 | 1 | 2 | 0 | 1 | 0 | 2 | 1 | 2 | 0 | 1 | 15 |
| Establishment of a pre    | EPH | OR | 30628955 | MPB/MABC  | YE   | 2 | 1 | 1 | 1 | 1 | 2 | 1 | 1 | 0 | 2 | 1 | 2 | 0 | 1 | 16 |
| Ethnic and Neighborhc     | EPH | OR | 30582395 | MPB/MABC  | JW   | 2 | 1 | 1 | 1 | 1 | 2 | 1 | 1 | 0 | 2 | 1 | 0 | 2 | 1 | 16 |
| Ethnic disparities in th  | EPH | OR | 31585186 | MPB/MABC  | MPB  | 2 | 1 | 1 | 1 | 1 | 2 | 0 | 1 | 0 | 2 | 1 | 2 | 2 | 1 | 17 |
| Evaluating the awarenc    | EPH | OR | 31463249 | MPB/MABC  | YE   | 1 | 1 | 1 | 1 | 0 | 2 | 0 | 1 | 0 | 2 | 1 | 0 | 0 | 2 | 12 |
| Evaluation of a Stand     | EPH | OR | 31539339 | MPB/MABC  | YE   | 2 | 1 | 1 | 1 | 1 | 2 | 1 | 1 | 0 | 2 | 1 | 2 | 0 | 1 | 16 |
| Exercise Related Sudd     | EPH | OR | 31560990 | MPB/MABC  | EM   | 1 | 1 | 1 | 1 | 1 | 2 | 1 | 1 | 0 | 2 | 1 | 0 | 0 | 1 | 13 |
| Exercise-related out-of   | EPH | OR | 30981883 | MPB/MABC  | JW   | 2 | 1 | 1 | 1 | 1 | 2 | 0 | 1 | 2 | 2 | 1 | 2 | 0 | 1 | 17 |
| External validation of    | EPH | OR | 31256916 | MPB/MABC  | JW   | 2 | 1 | 1 | 1 | 1 | 2 | 1 | 1 | 0 | 2 | 1 | 2 | 2 | 1 | 18 |
| Factors associated with   | EPH | OR | 31539607 | MBC/MABC  | SB   | 2 | 1 | 1 | 1 | 1 | 2 | 1 | 1 | 0 | 2 | 1 | 2 | 2 | 1 | 18 |
| Final-year medical stu    | EPH | OR | 31375334 | MPB, MABC | SB   | 1 | 1 | 1 | 1 | 1 | 0 | 0 | 0 | 0 | 2 | 1 | 2 | 0 | 0 | 10 |
| Future projections of t   | EPH | OR | 31125746 | MPB/MABC  | YE   | 2 | 1 | 1 | 1 | 1 | 2 | 1 | 1 | 0 | 2 | 1 | 0 | 0 | 1 | 14 |
| Gender Differences in t   | EPH | OR | 30545703 | MPB/MABC  | EM   | 1 | 1 | 1 | 1 | 1 | 0 | 0 | 1 | 0 | 2 | 1 | 0 | 0 | 1 | 10 |
| Gender differences in u   | EPH | OR | 31330199 | MPB, MABC | SB   | 2 | 1 | 1 | 1 | 1 | 2 | 1 | 1 | 0 | 2 | 1 | 2 | 0 | 0 | 15 |
| General Public's Know     | EPH | OR | 30896391 | MPB/MABC  | JW   | 1 | 1 | 1 | 1 | 1 | 2 | 1 | 1 | 0 | 2 | 1 | 2 | 0 | 0 | 14 |
| Geographical Differenc    | EPH | OR | 31888125 | MPB/MABC  | YE   | 2 | 1 | 1 | 1 | 1 | 2 | 1 | 1 | 0 | 2 | 1 | 0 | 0 | 1 | 14 |
| Hands-Only Cardiopul      | EPH | OR | 30442510 | MPB/MABC  | YE   | 3 | 1 | 1 | 1 | 1 | 2 | 1 | 1 | 2 | 2 | 1 | 2 | 2 | 1 | 21 |
| Healthcare professional   | EPH | OR | 29887282 | MABC      | MABC | 1 | 1 | 1 | 1 | 1 | 2 | 1 | 1 | 0 | 2 | 1 | 0 | 0 | 1 | 13 |
| High Incidence and M      | EPH | OR | 31165598 | MPB/MABC  | YE   | 2 | 1 | 1 | 1 | 1 | 2 | 1 | 1 | 0 | 2 | 1 | 0 | 0 | 1 | 14 |
| Hong Kong needs a te      | EPH | OR | 31178443 | MPB, MABC | SB   | 1 | 1 | 1 | 1 | 1 | 0 | 0 | 0 | 0 | 2 | 0 | 0 | 0 | 1 | 8  |
| Human factors influenc    | EPH | OR | 30759497 | MPB/MABC  | EM   | 1 | 1 | 0 | 1 | 1 | 2 | 1 | 1 | 0 | 2 | 1 | 0 | 0 | 1 | 12 |
| Hypertrophic Cardiom      | EPH | OR | 31630535 | MPB/MABC  | JW   | 2 | 1 | 1 | 1 | 1 | 2 | 0 | 1 | 0 | 2 | 1 | 0 | 2 | 1 | 15 |
| Hypoglycaemic episod      | EPH | OR | 31655001 | MPB/MABC  | JW   | 2 | 1 | 1 | 1 | 1 | 2 | 1 | 1 | 2 | 2 | 1 | 2 | 2 | 1 | 20 |
| Identifying patients at   | EPH | OR | 31530553 | MPB/MABC  | MPB  | 1 | 1 | 1 | 1 | 1 | 2 | 1 | 1 | 0 | 2 | 1 | 0 | 2 | 1 | 15 |
| Impact of population a    | EPH | OR | 31988755 | MABC      | MABC | 2 | 1 | 1 | 1 | 1 | 2 | 1 | 1 | 0 | 2 | 1 | 2 | 2 | 1 | 18 |
| Impact of Sex on Surv     | EPH | OR | 31791546 | MBC/MABC  | SB   | 2 | 1 | 1 | 1 | 1 | 0 | 0 | 0 | 0 | 2 | 1 | 2 | 0 | 1 | 12 |
| Impact of the consump     | EPH | OR | 31209087 | MPB/MABC  | JW   | 2 | 1 | 1 | 1 | 1 | 2 | 1 | 1 | 0 | 2 | 1 | 2 | 2 | 1 | 18 |
| Implementing automat      | EPH | OR | 31275605 | MPB/MABC  | JW   | 1 | 1 | 1 | 1 | 1 | 2 | 1 | 1 | 0 | 2 | 1 | 2 | 0 | 0 | 14 |
| In Hospitals With Mo      | EPH | OR | 31260358 | MPB/MABC  | EM   | 2 | 1 | 1 | 1 | 1 | 2 | 1 | 0 | 0 | 2 | 1 | 0 | 0 | 1 | 13 |
| In Silico Trial of Opti   | EPH | OR | 31537265 | MABC      | MABC | 2 | 1 | 1 | 1 | 1 | 2 | 1 | 1 | 0 | 2 | 1 | 2 | 2 | 1 | 18 |
| Incidence, Mortality, a   | EPH | OR | 30608874 | MPB, MABC | SB   | 1 | 1 | 1 | 1 | 1 | 2 | 0 | 1 | 0 | 2 | 1 | 2 | 0 | 1 | 14 |
| Informed consent and t    | EPH | OR | 28443357 | MPB/MABC  | JW   | 1 | 0 | 0 | 0 | 0 | 0 | 0 | 1 | 2 | 2 | 1 | 2 | 0 | 1 | 10 |
| Integration of 12-Lead    | EPH | OR | 30361038 | MBC/MABC  | SB   | 2 | 1 | 1 | 1 | 1 | 2 | 1 | 1 | 0 | 2 | 1 | 2 | 0 | 1 | 16 |
| International variation   | EPH | OR | 30898569 | MPB/MABC  | YE   | 2 | 1 | 1 | 1 | 1 | 2 | 1 | 1 | 2 | 2 | 1 | 0 | 0 | 1 | 16 |
| Interprofessional Educ    | EPH | OR | 28438106 | MPB/MABC  | EM   | 2 | 1 | 1 | 1 | 1 | 2 | 1 | 1 | 2 | 2 | 1 | 0 | 0 | 1 | 16 |
| Keeping Bystanders A      | EPH | OR | 31316962 | MPB/MABC  | MPB  | 3 | 1 | 1 | 1 | 0 | 2 | 1 | 1 | 0 | 2 | 1 | 0 | 2 | 1 | 16 |
| Knowledge and Attitu      | EPH | OR | 30941220 | MPB/MABC  | YE   | 1 | 1 | 1 | 1 | 1 | 2 | 1 | 1 | 0 | 2 | 1 | 0 | 0 | 1 | 13 |
| Knowledge and Attitu      | EPH | OR | 31106082 | MPB, MABC | SB   | 1 | 1 | 1 | 1 | 1 | 2 | 1 | 1 | 0 | 2 | 1 | 2 | 0 | 1 | 15 |
| Knowledge of and will     | EPH | OR | 31861024 | MABC      | MABC | 1 | 1 | 1 | 1 | 1 | 2 | 1 | 1 | 0 | 2 | 1 | 2 | 2 | 1 | 17 |

|                          |     |    |          |           |      |   |   |   |   |   |   |   |   |   |   |   |   |   |   |    |
|--------------------------|-----|----|----------|-----------|------|---|---|---|---|---|---|---|---|---|---|---|---|---|---|----|
| Knowledge of cardiop     | EPH | OR | 31711281 | MBC/MABC  | SB   | 1 | 1 | 1 | 1 | 1 | 2 | 1 | 1 | 0 | 2 | 1 | 2 | 0 | 0 | 14 |
| Knowledge of Nonmex      | EPH | OR | 30792927 | MPB, MABC | SB   | 1 | 1 | 1 | 1 | 1 | 2 | 1 | 1 | 0 | 2 | 1 | 2 | 0 | 1 | 15 |
| Laparoscopic Sleeve G    | EPH | OR | 31872338 | MPB/MABC  | JW   | 2 | 1 | 1 | 1 | 1 | 2 | 0 | 1 | 0 | 2 | 1 | 2 | 2 | 1 | 17 |
| Large urban center imp   | EPH | OR | 31009693 | MPB, MABC | SB   | 2 | 1 | 1 | 1 | 1 | 2 | 1 | 1 | 0 | 2 | 1 | 2 | 0 | 1 | 16 |
| Lay People training in   | EPH | OR | 31405209 | DC        | TM   | 1 | 1 | 1 | 1 | 0 | 0 | 0 | 1 | 2 | 2 | 1 | 2 | 2 | 1 | 15 |
| Lay People Training ir   | EPH | OR | 31405209 | DC        | RC   | 2 | 1 | 1 | 1 | 0 | 0 | 0 | 1 | 2 | 2 | 1 | 2 | 2 | 0 | 15 |
| Learning by teaching b   | EPH | OR | 30823878 | MPB/MABC  | YE   | 3 | 1 | 1 | 1 | 1 | 2 | 1 | 1 | 2 | 2 | 1 | 0 | 0 | 1 | 17 |
| Learning by teaching b   | EPH | OR | 30823878 | MPB/MABC  | MPB  | 3 | 1 | 1 | 1 | 1 | 2 | 1 | 1 | 0 | 2 | 1 | 2 | 0 | 1 | 17 |
| Lived Experiences of S   | EPH | OR | 30329171 | MPB/MABC  | EM   | 1 | 1 | 1 | 1 | 1 | 2 | 1 | 1 | 0 | 2 | 1 | 0 | 0 | 1 | 13 |
| Logistic early warning   | EPH | OR | 31270799 | MPB/MABC  | YE   | 2 | 1 | 1 | 1 | 0 | 2 | 1 | 0 | 2 | 0 | 0 | 0 | 0 | 0 | 10 |
| LONG-TERM SURVI          | EPH | OR | 31262547 | MPB, MABC | SB   | 2 | 1 | 1 | 1 | 1 | 2 | 1 | 1 | 0 | 2 | 1 | 2 | 0 | 1 | 16 |
| Long-term Trends in tl   | EPH | OR | 31513862 | MPB/MABC  | EM   | 1 | 1 | 1 | 1 | 1 | 2 | 1 | 1 | 0 | 2 | 1 | 0 | 0 | 1 | 13 |
| Lower Proportion of F    | EPH | OR | 31607503 | MPB/MABC  | MPB  | 2 | 1 | 1 | 1 | 1 | 2 | 1 | 1 | 0 | 2 | 1 | 0 | 0 | 1 | 14 |
| Lower socioeconomic      | EPH | OR | 31165498 | MPB, MABC | SC   | 2 | 1 | 1 | 1 | 1 | 2 | 1 | 1 | 2 | 2 | 1 | 0 | 0 | 1 | 16 |
| Management and outco     | EPH | OR | 31129228 | MPB/MABC  | YE   | 2 | 1 | 1 | 1 | 1 | 2 | 1 | 1 | 0 | 2 | 1 | 0 | 0 | 1 | 14 |
| Marriage Dissatisfacti   | EPH | OR | 30352663 | MBC/MABC  | SB   | 2 | 1 | 1 | 1 | 1 | 2 | 1 | 1 | 0 | 0 | 1 | 0 | 0 | 1 | 12 |
| Maternal cardiac arrest  | EPH | OR | 31051417 | MPB/MABC  | EM   | 1 | 1 | 1 | 1 | 1 | 2 | 1 | 1 | 0 | 2 | 1 | 0 | 0 | 1 | 13 |
| Maternal out-of-hospit   | EPH | OR | 30562597 | MABC      | MABC | 2 | 1 | 1 | 1 | 1 | 2 | 1 | 1 | 0 | 2 | 1 | 2 | 2 | 1 | 18 |
| Measuring Health Car     | EPH | OR | 31783966 | MPB/MABC  | EM   | 2 | 1 | 1 | 1 | 1 | 2 | 1 | 1 | 2 | 2 | 1 | 0 | 0 | 1 | 16 |
| Medical encounters, ca   | EPH | OR | 31371337 | MPB/MABC  | EM   | 1 | 1 | 1 | 1 | 1 | 2 | 1 | 1 | 0 | 0 | 0 | 0 | 0 | 1 | 10 |
| Neurological outcomes    | EPH | OR | 31714474 | MBC/MABC  | SB   | 2 | 1 | 1 | 1 | 1 | 2 | 1 | 1 | 0 | 2 | 1 | 2 | 2 | 1 | 18 |
| Nurse Vigilance: A Th    | EPH | OR | 31206418 | MPB/MABC  | EM   | 1 | 1 | 0 | 1 | 1 | 2 | 1 | 1 | 0 | 2 | 1 | 0 | 0 | 1 | 12 |
| Nursing knowledge of     | EPH | OR | 30746310 | MPB/MABC  | JW   | 2 | 1 | 1 | 1 | 1 | 2 | 0 | 1 | 0 | 2 | 1 | 2 | 2 | 1 | 17 |
| Out of hospital cardiac  | EPH | OR | 31401136 | MPB/MABC  | JW   | 2 | 1 | 1 | 1 | 1 | 2 | 1 | 1 | 2 | 2 | 1 | 0 | 2 | 1 | 18 |
| Out-of-hospital cardiac  | EPH | OR | 31517891 | MPB/MABC  | YE   | 2 | 1 | 1 | 1 | 1 | 0 | 0 | 1 | 0 | 2 | 1 | 2 | 0 | 1 | 13 |
| Out-of-Hospital Cardiz   | EPH | OR | 30654927 | MPB/MABC  | YE   | 2 | 1 | 1 | 1 | 1 | 2 | 1 | 1 | 0 | 2 | 1 | 0 | 0 | 1 | 14 |
| Out-of-hospital cardiac  | EPH | OR | 30481998 | MPB/MABC  | JW   | 2 | 1 | 1 | 1 | 1 | 2 | 1 | 1 | 2 | 2 | 1 | 0 | 0 | 1 | 16 |
| Out-of-hospital cardiac  | EPH | OR | 31504477 | MPB/MABC  | MPB  | 2 | 1 | 1 | 1 | 1 | 2 | 0 | 1 | 2 | 2 | 1 | 0 | 0 | 1 | 15 |
| Out-of-hospital cardiac  | EPH | OR | 31325557 | MABC      | MABC | 2 | 1 | 1 | 1 | 1 | 2 | 1 | 1 | 0 | 2 | 1 | 2 | 2 | 1 | 18 |
| Out-of-hospital cardiac  | EPH | OR | 31325557 | MPB, MABC | SB   | 2 | 1 | 1 | 1 | 1 | 2 | 1 | 1 | 0 | 2 | 1 | 2 | 0 | 1 | 16 |
| Out-of-hospital cardiac  | EPH | OR | 31311316 | MPB/MABC  | JW   | 2 | 1 | 1 | 1 | 1 | 0 | 0 | 1 | 0 | 2 | 1 | 2 | 2 | 1 | 15 |
| Outcome after pre-hosp   | EPH | OR | 30831217 | MPB/MABC  | JW   | 2 | 1 | 1 | 1 | 1 | 2 | 0 | 1 | 2 | 2 | 1 | 2 | 0 | 1 | 17 |
| Outcome of exercise-re   | EPH | OR | 30707745 | MPB/MABC  | YE   | 2 | 1 | 1 | 1 | 1 | 2 | 0 | 1 | 2 | 2 | 1 | 0 | 0 | 1 | 15 |
| Outcomes and modifia     | EPH | OR | 30855446 | MPB, MABC | SC   | 2 | 1 | 1 | 1 | 1 | 2 | 1 | 1 | 2 | 2 | 1 | 0 | 0 | 1 | 16 |
| Outcomes of Patients (   | EPH | OR | 30924892 | MPB/MABC  | EM   | 1 | 1 | 1 | 1 | 1 | 1 | 1 | 1 | 0 | 2 | 2 | 0 | 0 | 1 | 13 |
| Outcomes of Patients (   | EPH | OR | 30924892 | MPB, MABC | SB   | 2 | 1 | 1 | 1 | 1 | 2 | 1 | 1 | 0 | 2 | 1 | 2 | 0 | 1 | 16 |
| Outcomes of patients &   | EPH | OR | 30236610 | MPB/MABC  | YE   | 2 | 1 | 1 | 1 | 1 | 0 | 0 | 1 | 2 | 2 | 1 | 2 | 0 | 1 | 15 |
| Ozone and cardiac arre   | EPH | OR | 30399483 | MBC/MABC  | SB   | 1 | 1 | 1 | 1 | 1 | 2 | 1 | 1 | 0 | 2 | 1 | 2 | 2 | 1 | 17 |
| Patient, Neighborhood    | EPH | OR | 31287347 | MPB/MABC  | YE   | 2 | 1 | 1 | 1 | 1 | 2 | 1 | 1 | 0 | 2 | 1 | 2 | 2 | 1 | 18 |
| Patients' knowledge an   | EPH | OR | 30969861 | MPB/MABC  | JW   | 2 | 1 | 1 | 1 | 1 | 2 | 0 | 1 | 0 | 2 | 1 | 2 | 2 | 1 | 17 |
| Perceptions of Risk of   | EPH | OR | 31501048 | MPB/MABC  | YE   | 1 | 1 | 1 | 1 | 1 | 2 | 0 | 1 | 0 | 2 | 1 | 2 | 2 | 1 | 16 |
| Plakophilin-2 Truncati   | EPH | OR | 30678776 | MPB/MABC  | MPB  | 1 | 1 | 1 | 1 | 1 | 2 | 1 | 1 | 0 | 2 | 1 | 0 | 0 | 1 | 13 |
| Post-Mortem Imaging      | EPH | OR | 30340963 | MPB/MABC  | EM   | 1 | 1 | 1 | 1 | 1 | 0 | 0 | 0 | 0 | 2 | 1 | 0 | 0 | 1 | 9  |
| Postconvulsive central   | EPH | OR | 30568003 | MPB/MABC  | MPB  | 2 | 1 | 1 | 1 | 1 | 2 | 1 | 1 | 0 | 2 | 1 | 0 | 0 | 1 | 14 |
| Postmortem Interrogat    | EPH | OR | 30238160 | MPB/MABC  | EM   | 2 | 1 | 1 | 1 | 1 | 2 | 1 | 0 | 0 | 2 | 1 | 0 | 0 | 1 | 13 |
| Postoperative high-sen   | EPH | OR | 30701514 | MPB/MABC  | JW   | 2 | 0 | 1 | 1 | 0 | 2 | 0 | 1 | 2 | 2 | 1 | 2 | 0 | 1 | 15 |
| Pre-hospital outcomes    | EPH | OR | 31352690 | MPB/MABC  | YE   | 2 | 1 | 1 | 1 | 1 | 2 | 1 | 1 | 0 | 2 | 1 | 0 | 0 | 1 | 14 |
| Predicting Cardiac Arr   | EPH | OR | 31470543 | MPB/MABC  | JW   | 2 | 1 | 1 | 1 | 1 | 2 | 0 | 1 | 0 | 2 | 1 | 2 | 0 | 1 | 15 |
| Prediction and Prevent   | EPH | OR | 31586529 | MABC      | MABC | 2 | 1 | 1 | 1 | 1 | 2 | 1 | 1 | 0 | 2 | 1 | 2 | 2 | 1 | 18 |
| Predictors of in-hospit  | EPH | OR | 30887710 | MPB, MABC | SB   | 2 | 1 | 1 | 1 | 1 | 2 | 1 | 1 | 0 | 2 | 1 | 2 | 0 | 0 | 15 |
| Preferences of patients' | EPH | OR | 29699912 | MPB/MABC  | JW   | 1 | 1 | 1 | 1 | 1 | 2 | 1 | 1 | 0 | 2 | 1 | 2 | 0 | 1 | 15 |
| Prehospital Death Afte   | EPH | OR | 30898288 | MPB/MABC  | JW   | 1 | 1 | 1 | 1 | 1 | 2 | 0 | 0 | 0 | 2 | 1 | 2 | 0 | 0 | 12 |
| Prevalence of spontane   | EPH | OR | 30569504 | MPB/MABC  | MPB  | 2 | 1 | 1 | 1 | 1 | 0 | 0 | 1 | 0 | 2 | 1 | 0 | 0 | 1 | 11 |

|                          |     |    |          |           |      |   |   |   |   |   |   |   |   |   |   |   |   |   |   |    |
|--------------------------|-----|----|----------|-----------|------|---|---|---|---|---|---|---|---|---|---|---|---|---|---|----|
| Primary Prevention of    | EPH | OR | 30678832 | MBC/MABC  | SB   | 1 | 1 | 1 | 1 | 1 | 2 | 1 | 1 | 0 | 2 | 1 | 2 | 2 | 1 | 17 |
| Public knowledge, atti   | EPH | OR | 30190091 | MPB/MABC  | MPB  | 1 | 1 | 1 | 1 | 1 | 2 | 1 | 1 | 0 | 2 | 1 | 0 | 2 | 1 | 15 |
| Public location and su   | EPH | OR | 31350130 | MPB, MABC | SB   | 2 | 1 | 1 | 1 | 1 | 2 | 1 | 1 | 0 | 2 | 1 | 2 | 0 | 1 | 16 |
| Public perception towæ   | EPH | OR | 31473603 | MABC      | MABC | 1 | 1 | 1 | 1 | 1 | 2 | 1 | 1 | 0 | 2 | 1 | 2 | 2 | 1 | 17 |
| Public Perceptions on    | EPH | OR | 30779655 | MPB/MABC  | YE   | 1 | 1 | 1 | 1 | 1 | 2 | 0 | 1 | 2 | 2 | 1 | 2 | 2 | 1 | 18 |
| Public-access automata   | EPH | OR | 30500911 | MBC/MABC  | SB   | 2 | 1 | 1 | 1 | 1 | 2 | 1 | 1 | 0 | 2 | 1 | 2 | 2 | 1 | 18 |
| Public-access automata   | EPH | OR | 31400888 | MPB/MABC  | EM   | 2 | 1 | 1 | 1 | 1 | 2 | 1 | 1 | 0 | 2 | 1 | 0 | 0 | 1 | 14 |
| Public-Access Defibril   | EPH | OR | 31204367 | MPB/MABC  | YE   | 2 | 1 | 1 | 1 | 1 | 2 | 1 | 1 | 2 | 2 | 1 | 2 | 0 | 1 | 18 |
| Quantification of Vent   | EPH | OR | 29994685 | MABC      | MABC | 1 | 1 | 1 | 1 | 1 | 2 | 1 | 1 | 0 | 2 | 1 | 2 | 2 | 1 | 17 |
| Racial and ethnic diffe  | EPH | OR | 30753852 | MPB, MABC | SB   | 2 | 1 | 1 | 1 | 1 | 2 | 1 | 1 | 0 | 2 | 1 | 2 | 0 | 0 | 15 |
| Racial Differences in S  | EPH | OR | 30712378 | MPB/MABC  | EM   | 2 | 1 | 1 | 1 | 1 | 2 | 1 | 1 | 2 | 2 | 1 | 2 | 0 | 1 | 18 |
| Randomised controllex    | EPH | OR | 31015214 | MPB/MABC  | JW   | 4 | 1 | 1 | 1 | 1 | 2 | 1 | 1 | 0 | 2 | 1 | 2 | 2 | 1 | 20 |
| Randomized Controlle     | EPH | OR | 30643596 | MPB/MABC  | EM   | 2 | 1 | 1 | 1 | 1 | 2 | 1 | 1 | 2 | 2 | 1 | 2 | 2 | 1 | 20 |
| Rationale and Design     | EPH | OR | 31753903 | MPB/MABC  | EM   | 1 | 1 | 1 | 1 | 1 | 2 | 1 | 0 | 2 | 2 | 1 | 0 | 0 | 1 | 14 |
| Regional trends in In-l  | EPH | OR | 31408680 | MPB, MABC | SB   | 2 | 1 | 1 | 1 | 1 | 2 | 1 | 1 | 0 | 2 | 1 | 2 | 0 | 1 | 16 |
| Relationship between :   | EPH | OR | 30802556 | MPB/MABC  | EM   | 1 | 1 | 1 | 1 | 1 | 2 | 1 | 1 | 0 | 2 | 1 | 2 | 0 | 1 | 15 |
| Resuscitation for out-c  | EPH | OR | 30414749 | MABC      | MABC | 1 | 1 | 1 | 1 | 1 | 2 | 1 | 1 | 0 | 2 | 1 | 2 | 2 | 1 | 17 |
| Revised Cardiac Risk     | EPH | OR | 30005044 | MABC      | MABC | 2 | 1 | 1 | 1 | 1 | 2 | 1 | 1 | 0 | 2 | 1 | 2 | 2 | 1 | 18 |
| Risk factors associated  | EPH | OR | 31723930 | MBC/MABC  | SB   | 2 | 1 | 1 | 1 | 1 | 2 | 1 | 1 | 0 | 2 | 1 | 2 | 2 | 1 | 18 |
| Risk of Out-of-Hospit:   | EPH | OR | 31801927 | MPB/MABC  | EM   | 2 | 1 | 1 | 1 | 1 | 2 | 1 | 1 | 0 | 2 | 1 | 0 | 0 | 1 | 14 |
| Risk prediction of futu  | EPH | OR | 31759070 | MPB/MABC  | YE   | 2 | 1 | 1 | 1 | 1 | 2 | 0 | 1 | 0 | 2 | 1 | 0 | 0 | 1 | 13 |
| RNA sequencing revea     | EPH | OR | 31419596 | MBC/MABC  | SB   | 2 | 1 | 1 | 1 | 1 | 2 | 1 | 1 | 0 | 2 | 1 | 2 | 2 | 1 | 18 |
| Role of Angiotensin-C    | EPH | OR | 30242890 | MPB/MABC  | EM   | 2 | 1 | 1 | 1 | 1 | 2 | 1 | 1 | 0 | 2 | 1 | 2 | 0 | 1 | 16 |
| Self-learning training v | EPH | OR | 30926451 | MPB/MABC  | EM   | 4 | 1 | 1 | 1 | 1 | 2 | 1 | 1 | 2 | 2 | 1 | 2 | 2 | 1 | 22 |
| Sex Differences in "Dc   | EPH | OR | 31047712 | MPB/MABC  | YE   | 2 | 1 | 1 | 1 | 1 | 2 | 1 | 1 | 2 | 2 | 1 | 2 | 0 | 1 | 18 |
| Sex Differences in Ele   | EPH | OR | 31558356 | MPB/MABC  | JW   | 2 | 1 | 1 | 1 | 1 | 2 | 1 | 0 | 2 | 2 | 1 | 2 | 0 | 1 | 17 |
| Sex differences in the   | EPH | OR | 30735739 | MPB/MABC  | EM   | 2 | 1 | 1 | 1 | 1 | 2 | 1 | 1 | 2 | 2 | 1 | 2 | 0 | 1 | 18 |
| Sex Disparities in Rec   | EPH | OR | 31150086 | MPB, MABC | SB   | 2 | 1 | 1 | 1 | 1 | 2 | 1 | 1 | 0 | 2 | 1 | 2 | 0 | 1 | 16 |
| Sex Disparities in R     | EPH | OR | 31150086 | MPB/MABC  | MPB  | 2 | 1 | 1 | 1 | 1 | 2 | 1 | 1 | 0 | 2 | 1 | 2 | 2 | 1 | 18 |
| Sex-Based Disparities    | EPH | OR | 30922691 | MPB/MABC  | YE   | 2 | 1 | 1 | 1 | 1 | 2 | 1 | 1 | 0 | 2 | 1 | 2 | 2 | 1 | 18 |
| Sex-specific difference: | EPH | OR | 31345244 | MABC      | MABC | 1 | 1 | 1 | 1 | 1 | 2 | 1 | 1 | 0 | 2 | 1 | 2 | 2 | 1 | 17 |
| Sex-specific difference: | EPH | OR | 31345244 | MPB/MABC  | YE   | 2 | 1 | 1 | 1 | 1 | 2 | 1 | 1 | 0 | 2 | 1 | 0 | 0 | 1 | 14 |
| Simulating blood pres    | EPH | OR | 31437806 | MPB, MABC | SB   | 2 | 1 | 1 | 1 | 1 | 2 | 1 | 1 | 0 | 2 | 1 | 2 | 2 | 1 | 18 |
| Socioeconomic status     | EPH | OR | 29303842 | MBC/MABC  | SB   | 1 | 1 | 1 | 1 | 1 | 2 | 1 | 1 | 0 | 2 | 1 | 0 | 0 | 1 | 13 |
| Sudden Cardiac Arrest    | EPH | OR | 31618064 | MPB/MABC  | YE   | 2 | 1 | 1 | 1 | 1 | 2 | 1 | 1 | 2 | 2 | 1 | 2 | 0 | 1 | 18 |
| Sudden Cardiac Arrest    | EPH | OR | 31588605 | MPB/MABC  | EM   | 2 | 1 | 1 | 1 | 1 | 2 | 1 | 1 | 0 | 2 | 1 | 2 | 0 | 1 | 16 |
| Sudden cardiac arrest i  | EPH | OR | 30425046 | MPB/MABC  | JW   | 1 | 1 | 1 | 1 | 1 | 2 | 1 | 1 | 0 | 2 | 1 | 2 | 0 | 1 | 15 |
| Sudden Cardiac Arrest    | EPH | OR | 31705910 | MPB/MABC  | EM   | 2 | 1 | 1 | 1 | 1 | 2 | 1 | 1 | 0 | 2 | 1 | 0 | 0 | 1 | 14 |
| Sudden Cardiac Death     | EPH | OR | 30827144 | MPB/MABC  | JW   | 2 | 0 | 1 | 1 | 1 | 2 | 1 | 1 | 0 | 2 | 1 | 2 | 2 | 1 | 17 |
| Sudden cardiac death i   | EPH | OR | 31852072 | MPB/MABC  | YE   | 2 | 1 | 1 | 1 | 1 | 2 | 0 | 1 | 0 | 2 | 1 | 2 | 0 | 1 | 15 |
| Sudden Cardiac Death     | EPH | OR | 30779638 | MPB/MABC  | JW   | 2 | 1 | 1 | 1 | 1 | 2 | 1 | 1 | 2 | 2 | 1 | 2 | 2 | 1 | 20 |
| Sudden Cardiac Death     | EPH | OR | 30808515 | MPB/MABC  | MPB  | 2 | 1 | 1 | 1 | 1 | 0 | 1 | 1 | 0 | 2 | 1 | 0 | 0 | 1 | 12 |
| Survival after cardiopu  | EPH | OR | 30905924 | MPB, MABC | SB   | 2 | 1 | 1 | 1 | 1 | 2 | 1 | 1 | 0 | 2 | 1 | 2 | 0 | 1 | 16 |
| Survival After Exercis   | EPH | OR | 30204540 | MPB/MABC  | MPB  | 2 | 1 | 1 | 1 | 1 | 2 | 1 | 1 | 0 | 2 | 1 | 2 | 2 | 1 | 18 |
| Survival after out-of-h  | EPH | OR | 30327393 | MPB/MABC  | JW   | 2 | 1 | 1 | 1 | 1 | 2 | 1 | 1 | 0 | 2 | 1 | 2 | 2 | 1 | 18 |
| Survival of patients wi  | EPH | OR | 30632777 | MPB/MABC  | EM   | 2 | 1 | 1 | 1 | 1 | 2 | 1 | 1 | 0 | 2 | 1 | 2 | 0 | 1 | 16 |
| Teaching Cardiopulmc     | EPH | OR | 30879607 | MPB/MABC  | EM   | 2 | 1 | 1 | 0 | 0 | 0 | 0 | 0 | 0 | 2 | 1 | 0 | 2 | 0 | 9  |
| Temporal Trends in th    | EPH | OR | 31512958 | MPB/MABC  | JW   | 2 | 1 | 1 | 1 | 1 | 2 | 0 | 1 | 0 | 2 | 1 | 0 | 0 | 1 | 13 |
| The association betwe    | EPH | OR | 31129227 | MPB/MABC  | JW   | 2 | 1 | 1 | 1 | 1 | 2 | 1 | 1 | 2 | 2 | 1 | 2 | 0 | 0 | 17 |
| The congenital disorde   | EPH | OR | 31563034 | MPB/MABC  | JW   | 1 | 1 | 1 | 1 | 0 | 2 | 1 | 1 | 0 | 2 | 1 | 2 | 0 | 1 | 14 |
| The Effect of Rurality   | EPH | OR | 28842929 | MPB/MABC  | MPB  | 2 | 1 | 1 | 1 | 1 | 0 | 0 | 1 | 0 | 2 | 1 | 0 | 2 | 1 | 13 |
| The effectiveness of te  | EPH | OR | 30921176 | MPB/MABC  | EM   | 1 | 1 | 1 | 1 | 1 | 2 | 1 | 1 | 2 | 2 | 1 | 2 | 2 | 1 | 19 |
| The epidemiology of i    | EPH | OR | 31462205 | MPB/MABC  | JW   | 2 | 1 | 1 | 1 | 1 | 2 | 0 | 1 | 2 | 2 | 1 | 2 | 0 | 0 | 16 |

|                          |     |    |          |           |      |   |   |   |   |   |   |   |   |   |   |   |   |   |   |    |
|--------------------------|-----|----|----------|-----------|------|---|---|---|---|---|---|---|---|---|---|---|---|---|---|----|
| The Feasibility of a N   | EPH | OR | 31757671 | MPB/MABC  | EM   | 1 | 1 | 1 | 1 | 0 | 2 | 0 | 0 | 2 | 2 | 1 | 2 | 0 | 1 | 14 |
| The impact of psychol    | EPH | OR | 30586654 | MABC      | MABC | 1 | 1 | 1 | 1 | 1 | 2 | 1 | 1 | 0 | 2 | 1 | 2 | 2 | 1 | 17 |
| The influence of past e  | EPH | OR | 31830912 | MABC      | MABC | 2 | 1 | 1 | 1 | 1 | 2 | 1 | 1 | 0 | 2 | 1 | 2 | 2 | 1 | 18 |
| The narrow-sense and c   | EPH | OR | 30297186 | MPB/MABC  | YE   | 2 | 1 | 1 | 1 | 1 | 2 | 0 | 1 | 0 | 2 | 1 | 0 | 0 | 1 | 13 |
| The Relation of Emerg    | EPH | OR | 30567633 | MPB/MABC  | JW   | 2 | 0 | 1 | 1 | 1 | 2 | 1 | 1 | 0 | 2 | 1 | 2 | 2 | 1 | 17 |
| The role of heart rate v | EPH | OR | 30476644 | MPB/MABC  | MPB  | 2 | 1 | 1 | 1 | 1 | 2 | 1 | 1 | 0 | 2 | 1 | 0 | 0 | 1 | 14 |
| The timing of testing i  | EPH | OR | 31801502 | MABC      | MABC | 2 | 1 | 1 | 1 | 1 | 2 | 1 | 1 | 0 | 2 | 1 | 2 | 2 | 1 | 18 |
| The utilization of auto  | EPH | OR | 29588095 | MBC/MABC  | SB   | 1 | 1 | 1 | 1 | 1 | 2 | 1 | 1 | 0 | 2 | 1 | 0 | 2 | 1 | 15 |
| Thrombolysis During      | EPH | OR | 31381884 | MPB/MABC  | YE   | 2 | 1 | 1 | 1 | 1 | 2 | 1 | 1 | 2 | 2 | 1 | 0 | 0 | 1 | 16 |
| Time of out-of-hospita   | EPH | OR | 31326405 | MPB/MABC  | EM   | 2 | 1 | 1 | 1 | 1 | 2 | 1 | 1 | 0 | 2 | 1 | 2 | 2 | 1 | 18 |
| To Enhance the Qualit    | EPH | OR | 31590653 | MPB/MABC  | EM   | 2 | 1 | 1 | 1 | 1 | 2 | 1 | 1 | 2 | 2 | 1 | 0 | 0 | 1 | 16 |
| TrpTe and TpTe/QT: no    | EPH | OR | 30118535 | MPB/MABC  | JW   | 2 | 1 | 1 | 1 | 1 | 2 | 0 | 0 | 0 | 2 | 1 | 0 | 0 | 1 | 12 |
| Trapped in a disrupted   | EPH | OR | 31887365 | MPB/MABC  | MPB  | 1 | 1 | 1 | 1 | 1 | 2 | 1 | 1 | 0 | 2 | 1 | 2 | 2 | 1 | 17 |
| Trends in overdose-rel   | EPH | OR | 30352247 | MBC/MABC  | SB   | 1 | 1 | 1 | 1 | 1 | 2 | 1 | 1 | 0 | 2 | 1 | 2 | 2 | 1 | 17 |
| Two major earthquakes    | EPH | OR | 31051009 | MABC      | MABC | 2 | 1 | 1 | 1 | 1 | 2 | 1 | 1 | 0 | 2 | 1 | 2 | 2 | 1 | 18 |
| Unexpected High Prev     | EPH | OR | 30661423 | MPB, MABC | SB   | 1 | 1 | 1 | 1 | 1 | 2 | 1 | 1 | 0 | 2 | 1 | 2 | 0 | 1 | 15 |
| Unexpected shift in cir  | EPH | OR | 30193852 | MPB/MABC  | MPB  | 2 | 1 | 1 | 1 | 1 | 2 | 0 | 1 | 0 | 2 | 1 | 0 | 0 | 1 | 13 |
| Use of a Virtual Realit  | EPH | OR | 31490865 | MBC/MABC  | SB   | 1 | 1 | 1 | 1 | 1 | 2 | 1 | 1 | 0 | 2 | 1 | 2 | 0 | 1 | 15 |
| Usefulness of Focused    | EPH | OR | 30348435 | MPB/MABC  | EM   | 2 | 1 | 1 | 1 | 1 | 2 | 1 | 1 | 0 | 0 | 0 | 0 | 0 | 1 | 11 |
| Usefulness of Genetic    | EPH | OR | 30975432 | MPB/MABC  | YE   | 2 | 1 | 1 | 1 | 1 | 2 | 0 | 1 | 0 | 2 | 1 | 0 | 0 | 1 | 13 |
| Utilization of implanta  | EPH | OR | 31561030 | MPB/MABC  | YE   | 2 | 1 | 1 | 1 | 1 | 2 | 1 | 1 | 0 | 2 | 1 | 0 | 0 | 1 | 14 |
| Variability in survival  | EPH | OR | 30771450 | MPB, MABC | SB   | 2 | 1 | 1 | 1 | 1 | 2 | 1 | 1 | 0 | 2 | 1 | 2 | 0 | 0 | 15 |
| Variation in Bystander   | EPH | OR | 31887076 | MPB/MABC  | JW   | 2 | 1 | 1 | 1 | 1 | 2 | 1 | 1 | 0 | 2 | 1 | 2 | 0 | 1 | 16 |
| Variation in Survival /  | EPH | OR | 31767599 | MPB/MABC  | EM   | 1 | 1 | 1 | 1 | 1 | 2 | 1 | 1 | 0 | 2 | 1 | 2 | 0 | 1 | 15 |
| Vulnerability to cardia  | EPH | OR | 31452398 | MPB, MABC | SB   | 2 | 1 | 1 | 1 | 1 | 0 | 0 | 0 | 0 | 2 | 1 | 2 | 0 | 0 | 11 |
| What Do Adolescents      | EPH | OR | 30909545 | MBC/MABC  | SB   | 3 | 1 | 1 | 1 | 1 | 2 | 1 | 1 | 0 | 2 | 1 | 2 | 2 | 1 | 19 |
| What Do Adolescents      | EPH | OR | 30909545 | MPB/MABC  | JW   | 2 | 1 | 1 | 0 | 1 | 2 | 0 | 1 | 0 | 2 | 1 | 2 | 0 | 0 | 13 |
| When is a bystander no   | EPH | OR | 30572073 | MPB/MABC  | MPB  | 1 | 1 | 1 | 1 | 1 | 2 | 0 | 1 | 2 | 2 | 1 | 0 | 2 | 1 | 16 |
| When the Female Hear     | EPH | OR | 31053294 | MPB, MABC | SB   | 2 | 1 | 1 | 1 | 1 | 2 | 1 | 1 | 0 | 2 | 1 | 2 | 0 | 1 | 16 |
| Willingness and Obsta    | EPH | OR | 31494073 | MPB/MABC  | EM   | 1 | 1 | 1 | 1 | 1 | 2 | 1 | 1 | 2 | 0 | 1 | 0 | 0 | 1 | 13 |
| Women have lower chi     | EPH | OR | 31112998 | MPB, MABC | SC   | 2 | 1 | 1 | 1 | 1 | 2 | 1 | 1 | 2 | 2 | 1 | 0 | 0 | 1 | 16 |
| Prevalence and Outcon    | EPM | OR | 31543736 | MPB/MABC  | JW   | 1 | 1 | 1 | 1 | 1 | 2 | 1 | 1 | 0 | 2 | 1 | 0 | 0 | 1 | 13 |
| Amplitude-Integrated I   | IN  | OR | 31381485 | KD        | CH   | 2 | 1 | 1 | 1 | 1 | 2 | 1 | 1 | 2 | 2 | 1 | 2 | 2 | 1 | 20 |
| A comparison of intrav   | IN  | OR | 31348276 | CH        | DB   | 2 | 1 | 1 | 1 | 1 | 2 | 1 | 1 | 2 | 2 | 1 | 2 | 2 | 1 | 20 |
| A comparison of the al   | IN  | OR | 30287355 | CH        | KD   | 2 | 1 | 1 | 1 | 1 | 0 | 0 | 1 | 2 | 2 | 1 | 2 | 2 | 1 | 17 |
| A new paradigm for lu    | IN  | OR | 31447395 | CH        | RL   | 3 | 1 | 1 | 1 | 1 | 2 | 1 | 1 | 0 | 2 | 1 | 0 | 0 | 1 | 15 |
| A Population-Based A     | IN  | OR | 31651456 | CH        | DC   | 2 | 1 | 1 | 1 | 1 | 2 | 1 | 1 | 2 | 2 | 1 | 0 | 0 | 1 | 16 |
| A review of Code Blu     | IN  | OR | 31633855 | CH        | DB   | 1 | 0 | 0 | 1 | 1 | 2 | 0 | 1 | 2 | 2 | 1 | 2 | 0 | 1 | 14 |
| A survey of ventilator   | IN  | OR | 31534596 | CH        | DB   | 1 | 0 | 1 | 1 | 1 | 2 | 1 | 1 | 2 | 2 | 1 | 0 | 0 | 1 | 14 |
| Adaptation of global h   | IN  | OR | 28695976 | CH        | GS   | 2 | 1 | 1 | 1 | 1 | 2 | 1 | 1 | 2 | 2 | 1 | 2 | 2 | 1 | 20 |
| Admission Society for    | IN  | OR | 31710843 | CH        | KD   | 2 | 1 | 1 | 1 | 1 | 2 | 1 | 1 | 2 | 2 | 1 | 2 | 2 | 1 | 20 |
| Adrenaline, ROSC and     | IN  | OR | 31125581 | KD        | CH   | 2 | 1 | 1 | 1 | 1 | 2 | 0 | 1 | 2 | 2 | 1 | 2 | 0 | 1 | 17 |
| After COACT trial-nev    | IN  | OR | 31660312 | CH        | RL   | 4 | 1 | 1 | 0 | 1 | 0 | 0 | 1 | 2 | 2 | 1 | 2 | 2 | 1 | 18 |
| An Analysis Using Mo     | IN  | OR | 31198281 | CH        | DC   | 2 | 1 | 1 | 1 | 1 | 2 | 1 | 1 | 2 | 2 | 1 | 0 | 0 | 1 | 16 |
| An outcome study of ε    | IN  | OR | 31864867 | CH        | DC   | 2 | 1 | 1 | 1 | 1 | 2 | 1 | 1 | 2 | 2 | 1 | 0 | 0 | 1 | 16 |
| Assessment of cardiop    | IN  | OR | 31714118 | CH        | KD   | 1 | 1 | 1 | 1 | 1 | 2 | 1 | 0 | 0 | 0 | 0 | 2 | 0 | 1 | 11 |
| Association between e    | IN  | OR | 31466139 | CH        | DB   | 2 | 1 | 1 | 1 | 1 | 2 | 1 | 1 | 2 | 2 | 1 | 2 | 0 | 1 | 18 |
| Association between h    | IN  | OR | 30871337 | CH        | DB   | 2 | 0 | 1 | 1 | 1 | 2 | 1 | 1 | 2 | 2 | 1 | 2 | 2 | 1 | 19 |
| Association Between F    | IN  | OR | 30871337 | CH        | GS   | 2 | 1 | 1 | 1 | 1 | 2 | 1 | 1 | 2 | 2 | 1 | 0 | 0 | 1 | 16 |
| Association between h    | IN  | OR | 31303537 | CH        | RL   | 2 | 1 | 1 | 0 | 1 | 0 | 0 | 1 | 0 | 2 | 1 | 2 | 2 | 1 | 14 |
| Association Between F    | IN  | OR | 31526205 | CH        | GS   | 2 | 1 | 1 | 1 | 1 | 2 | 1 | 1 | 2 | 2 | 1 | 2 | 0 | 1 | 18 |
| Association between r    | IN  | OR | 31394154 | CH        | DC   | 2 | 1 | 1 | 1 | 1 | 2 | 1 | 1 | 2 | 2 | 1 | 2 | 2 | 1 | 20 |
| Association between sl   | IN  | OR | 31377392 | CH        | GS   | 2 | 1 | 1 | 1 | 1 | 2 | 0 | 1 | 2 | 2 | 1 | 2 | 0 | 1 | 17 |



|                                 |    |    |          |    |    |   |   |   |   |   |   |   |   |   |   |   |   |   |   |    |
|---------------------------------|----|----|----------|----|----|---|---|---|---|---|---|---|---|---|---|---|---|---|---|----|
| Association Between 1           | IN | OR | 30276614 | CH | KD | 2 | 1 | 1 | 1 | 1 | 2 | 1 | 1 | 2 | 2 | 1 | 2 | 2 | 1 | 20 |
| Association Between 1           | IN | OR | 31200920 | CH | RL | 2 | 1 | 1 | 1 | 1 | 2 | 1 | 1 | 2 | 2 | 1 | 2 | 2 | 1 | 20 |
| Association of acute m          | IN | OR | 30597584 | CH | DC | 2 | 1 | 1 | 1 | 1 | 2 | 0 | 1 | 2 | 2 | 1 | 0 | 0 | 1 | 15 |
| Association of acute m          | IN | OR | 30597584 | CH | GS | 2 | 1 | 1 | 1 | 1 | 2 | 0 | 1 | 0 | 0 | 1 | 0 | 0 | 0 | 10 |
| Association of antiepileptic    | IN | OR | 31325554 | CH | DC | 2 | 1 | 1 | 1 | 1 | 2 | 1 | 1 | 2 | 2 | 1 | 2 | 0 | 1 | 18 |
| Association of extracranial     | IN | OR | 30819234 | CH | RL | 2 | 1 | 1 | 0 | 1 | 2 | 1 | 1 | 0 | 2 | 1 | 0 | 2 | 1 | 15 |
| Association of sudden cardiac   | IN | OR | 30862425 | CH | DB | 2 | 0 | 1 | 1 | 1 | 2 | 0 | 1 | 2 | 2 | 1 | 0 | 0 | 1 | 14 |
| Association of Vitamin D        | IN | OR | 31490356 | CH | GS | 2 | 1 | 1 | 1 | 1 | 2 | 1 | 1 | 2 | 2 | 1 | 2 | 2 | 1 | 20 |
| Automated detection of          | IN | OR | 31627019 | CH | DB | 1 | 0 | 1 | 1 | 0 | 0 | 0 | 0 | 2 | 2 | 1 | 2 | 2 | 1 | 13 |
| Basic life support training     | IN | OR | 31505232 | CH | DB | 4 | 1 | 1 | 1 | 1 | 2 | 1 | 1 | 2 | 2 | 1 | 2 | 2 | 1 | 22 |
| Bedside Interpretation          | IN | OR | 31465539 | CH | SC | 1 | 1 | 1 | 1 | 1 | 2 | 1 | 1 | 2 | 2 | 1 | 0 | 0 | 1 | 15 |
| Better Cardiac Arrest Care      | IN | OR | 31567258 | CH | KD | 2 | 1 | 0 | 0 | 0 | 0 | 0 | 0 | 0 | 2 | 1 | 2 | 2 | 1 | 11 |
| Bleeding Complications          | IN | OR | 30523732 | CH | RL | 2 | 1 | 1 | 1 | 1 | 2 | 1 | 1 | 2 | 2 | 1 | 2 | 2 | 1 | 20 |
| Cangrelor in cardiogenic        | IN | OR | 30790690 | CH | DC | 2 | 1 | 1 | 1 | 1 | 2 | 1 | 1 | 2 | 2 | 1 | 0 | 0 | 1 | 16 |
| Capnography: A Supportive       | IN | OR | 31005583 | CH | DB | 2 | 0 | 1 | 1 | 1 | 0 | 0 | 1 | 2 | 2 | 1 | 2 | 2 | 0 | 15 |
| Cardiac arrest and subsequent   | IN | OR | 30889030 | CH | DB | 2 | 0 | 1 | 1 | 1 | 2 | 1 | 1 | 0 | 2 | 1 | 0 | 0 | 1 | 13 |
| Cardiac Arrest in the Community | IN | OR | 31537284 | CH | DC | 4 | 1 | 1 | 1 | 1 | 2 | 1 | 1 | 0 | 2 | 1 | 2 | 0 | 1 | 18 |
| Cardiac arrest in the intensive | IN | OR | 31521775 | CH | DB | 1 | 1 | 1 | 1 | 1 | 2 | 0 | 1 | 2 | 2 | 1 | 0 | 0 | 1 | 14 |
| Cardiopulmonary resuscitation   | IN | OR | 31126275 | CH | DB | 1 | 0 | 1 | 1 | 1 | 2 | 1 | 1 | 2 | 2 | 1 | 0 | 0 | 1 | 14 |
| Care After Resuscitation        | IN | OR | 31287385 | KD | CH | 2 | 1 | 1 | 1 | 1 | 0 | 0 | 1 | 2 | 2 | 1 | 2 | 0 | 1 | 15 |
| Challenges in the development   | IN | OR | 31887368 | CH | GS | 1 | 1 | 1 | 1 | 0 | 2 | 1 | 1 | 0 | 2 | 1 | 0 | 0 | 1 | 12 |
| Change in myocardial perfusion  | IN | OR | 31022454 | CH | GS | 2 | 1 | 1 | 1 | 1 | 2 | 0 | 0 | 2 | 2 | 1 | 2 | 2 | 1 | 18 |
| Characteristics and outcomes    | IN | OR | 30401593 | CH | KD | 2 | 1 | 1 | 1 | 1 | 2 | 1 | 1 | 0 | 2 | 1 | 0 | 0 | 1 | 14 |
| Characteristics and Outcomes    | IN | OR | 31819835 | CH | RL | 2 | 1 | 1 | 1 | 0 | 2 | 1 | 1 | 2 | 2 | 1 | 2 | 2 | 1 | 19 |
| Clinical Factors Associated     | IN | OR | 31172695 | CH | GS | 2 | 1 | 1 | 1 | 1 | 2 | 1 | 1 | 2 | 2 | 1 | 2 | 2 | 1 | 20 |
| Cluster randomised controlled   | IN | OR | 30683057 | KD | CH | 2 | 1 | 1 | 1 | 1 | 2 | 1 | 1 | 0 | 2 | 1 | 2 | 0 | 1 | 16 |
| Cluster randomised controlled   | IN | OR | 30683057 | CH | CH | 3 | 1 | 1 | 1 | 1 | 2 | 1 | 1 | 0 | 2 | 1 | 0 | 0 | 1 | 15 |
| Coagulation Derangements        | IN | OR | 30655200 | CH | RL | 2 | 1 | 1 | 1 | 1 | 2 | 0 | 0 | 0 | 2 | 1 | 2 | 2 | 0 | 15 |
| Code blue pit crew members      | IN | OR | 31299222 | CH | GS | 1 | 1 | 1 | 1 | 1 | 2 | 1 | 1 | 2 | 2 | 1 | 2 | 2 | 1 | 19 |
| Comparing in-patient care       | IN | OR | 31296118 | CH | GS | 2 | 1 | 1 | 1 | 1 | 2 | 0 | 1 | 0 | 2 | 1 | 0 | 0 | 1 | 13 |
| Comparison of clinical practice | IN | OR | 31371275 | CH | RL | 2 | 1 | 1 | 1 | 1 | 2 | 1 | 1 | 0 | 2 | 1 | 2 | 2 | 0 | 17 |
| Comparison of in-hospital       | IN | OR | 31702660 | CH | DC | 2 | 1 | 1 | 0 | 1 | 2 | 1 | 1 | 2 | 2 | 1 | 2 | 0 | 1 | 17 |
| Controlled automated external   | IN | OR | 31293795 | CH | DB | 1 | 0 | 0 | 1 | 0 | 2 | 1 | 1 | 2 | 2 | 1 | 2 | 0 | 1 | 14 |
| COOL-ARREST: Resuscitation      | IN | OR | 29883298 | CH | DB | 2 | 0 | 1 | 1 | 1 | 2 | 1 | 1 | 2 | 2 | 1 | 2 | 0 | 1 | 17 |
| Coronary angiographic           | IN | OR | 31560991 | CH | GS | 2 | 1 | 1 | 1 | 1 | 2 | 1 | 1 | 2 | 2 | 1 | 2 | 2 | 1 | 20 |
| Coronary angiography            | IN | OR | 30883057 | CH | DB | 4 | 1 | 1 | 1 | 1 | 2 | 1 | 1 | 2 | 2 | 1 | 0 | 0 | 0 | 17 |
| Cost-effectiveness of           | IN | OR | 31473264 | CH | KD | 0 | 1 | 1 | 1 | 1 | 0 | 1 | 1 | 2 | 2 | 1 | 2 | 0 | 1 | 14 |
| Cut-off values of serum         | IN | OR | 31022496 | CH | DC | 2 | 1 | 1 | 1 | 1 | 2 | 1 | 1 | 0 | 2 | 1 | 2 | 0 | 1 | 16 |
| Data and methods to             | IN | OR | 31890782 | CH | RL | 2 | 1 | 1 | 0 | 1 | 0 | 0 | 1 | 0 | 2 | 1 | 0 | 2 | 1 | 12 |
| Death after awakening           | IN | OR | 30944013 | KD | CH | 2 | 1 | 1 | 1 | 1 | 2 | 1 | 1 | 2 | 0 | 0 | 0 | 0 | 1 | 13 |
| Decision tree model for         | IN | OR | 31509271 | CH | DC | 2 | 1 | 1 | 1 | 1 | 2 | 1 | 1 | 2 | 2 | 1 | 2 | 2 | 1 | 20 |
| Decision-making in cardiac      | IN | OR | 30588135 | CH | DB | 1 | 0 | 1 | 1 | 1 | 2 | 1 | 1 | 2 | 2 | 1 | 2 | 2 | 0 | 17 |
| Diagnostic value of             | IN | OR | 31330201 | CH | GS | 2 | 1 | 1 | 1 | 1 | 2 | 1 | 1 | 2 | 2 | 1 | 2 | 2 | 1 | 20 |
| Dimensional structure           | IN | OR | 30927582 | CH | CH | 2 | 1 | 1 | 1 | 1 | 2 | 1 | 1 | 2 | 2 | 1 | 0 | 2 | 1 | 18 |
| Dimensional structure           | IN | OR | 30927582 | CH | RL | 2 | 1 | 1 | 1 | 1 | 2 | 1 | 1 | 2 | 2 | 1 | 0 | 0 | 1 | 16 |
| Direct or subacute              | IN | OR | 31028826 | CH | RL | 4 | 1 | 1 | 1 | 1 | 2 | 1 | 1 | 0 | 2 | 1 | 2 | 2 | 1 | 20 |
| Disability-Adjusted Life        | IN | OR | 30859852 | KD | CH | 2 | 1 | 1 | 1 | 1 | 2 | 1 | 1 | 2 | 2 | 1 | 0 | 0 | 1 | 16 |
| Does Point-of-care Ultrasound   | IN | OR | 31205842 | CH | RL | 2 | 1 | 1 | 1 | 1 | 2 | 1 | 1 | 0 | 2 | 1 | 2 | 2 | 1 | 18 |
| Door-to-targeted temperature    | IN | OR | 31955981 | CH | DB | 2 | 1 | 1 | 1 | 1 | 2 | 1 | 1 | 2 | 2 | 1 | 2 | 2 | 1 | 20 |
| Door-to-Targeted Temperature    | IN | OR | 31055981 | CH | GS | 2 | 1 | 1 | 1 | 1 | 2 | 1 | 1 | 2 | 2 | 1 | 2 | 0 | 1 | 18 |
| Door-to-Targeted Temperature    | IN | OR | 31055981 | CH | KD | 2 | 1 | 1 | 1 | 1 | 2 | 1 | 1 | 0 | 2 | 1 | 2 | 2 | 1 | 18 |
| Duration of in-hospital         | IN | OR | 31779859 | CH | RL | 2 | 1 | 1 | 1 | 1 | 2 | 1 | 1 | 2 | 2 | 1 | 2 | 2 | 1 | 20 |
| Dynamic determination           | IN | OR | 31828754 | CH | RL | 2 | 1 | 1 | 1 | 1 | 2 | 1 | 1 | 2 | 2 | 1 | 2 | 2 | 1 | 20 |

|                          |    |    |          |    |    |   |   |   |   |   |   |   |   |   |   |   |   |   |   |    |
|--------------------------|----|----|----------|----|----|---|---|---|---|---|---|---|---|---|---|---|---|---|---|----|
| Early full-body compu    | IN | OR | 31811881 | CH | DC | 2 | 1 | 1 | 1 | 1 | 0 | 0 | 1 | 2 | 2 | 1 | 2 | 2 | 0 | 16 |
| Early goal-directed hae  | IN | OR | 30895296 | CH | DC | 4 | 1 | 1 | 1 | 1 | 2 | 1 | 1 | 2 | 2 | 1 | 2 | 0 | 1 | 20 |
| Early goal-directed hae  | IN | OR | 30895296 | CH | DC | 4 | 1 | 1 | 1 | 1 | 2 | 1 | 1 | 2 | 2 | 1 | 2 | 0 | 1 | 20 |
| Early initiation of cont | IN | OR | 30335673 | CH | DB | 4 | 1 | 1 | 1 | 1 | 2 | 1 | 1 | 2 | 2 | 1 | 2 | 2 | 0 | 21 |
| Early termination of re  | IN | OR | 31328251 | CH | GS | 2 | 1 | 1 | 1 | 1 | 2 | 1 | 1 | 2 | 0 | 1 | 0 | 0 | 1 | 14 |
| Early termination of re  | IN | OR | 31328251 | CH | GS | 2 | 1 | 1 | 1 | 1 | 2 | 1 | 1 | 0 | 2 | 1 | 0 | 0 | 1 | 14 |
| Early vs. delayed in-hc  | IN | OR | 31759071 | CH | KD | 2 | 1 | 1 | 1 | 1 | 0 | 0 | 1 | 2 | 2 | 1 | 2 | 2 | 1 | 17 |
| Early whole-body CT      | IN | OR | 31468207 | CH | DC | 2 | 1 | 1 | 0 | 0 | 2 | 0 | 1 | 2 | 2 | 1 | 2 | 0 | 0 | 14 |
| Early withdrawal of lif  | IN | OR | 30836171 | KD | CH | 2 | 1 | 1 | 1 | 1 | 2 | 1 | 1 | 2 | 2 | 1 | 2 | 2 | 1 | 20 |
| Early withdrawal of lif  | IN | OR | 30836171 | CH | RL | 2 | 1 | 1 | 1 | 1 | 2 | 0 | 1 | 2 | 2 | 1 | 2 | 2 | 1 | 19 |
| Effect of interplay betv | IN | OR | 30547322 | CH | GS | 2 | 1 | 1 | 1 | 1 | 2 | 1 | 1 | 2 | 2 | 1 | 2 | 2 | 1 | 20 |
| Effect of Mean Blood     | IN | OR | 31080955 | CH | DC | 2 | 1 | 1 | 1 | 1 | 2 | 1 | 1 | 2 | 2 | 1 | 0 | 0 | 1 | 16 |
| Effect of Public Repor   | IN | OR | 30998398 | CH | DC | 2 | 1 | 1 | 1 | 1 | 0 | 0 | 1 | 2 | 2 | 1 | 0 | 0 | 1 | 13 |
| Effect of selenium on c  | IN | OR | 29556681 | CH | DB | 2 | 1 | 1 | 1 | 1 | 2 | 1 | 1 | 2 | 2 | 1 | 2 | 0 | 1 | 18 |
| Effect of selenium on c  | IN | OR | 29556681 | CH | CH | 2 | 1 | 1 | 1 | 1 | 2 | 1 | 1 | 0 | 2 | 1 | 2 | 2 | 1 | 18 |
| Effect of the floor leve | IN | OR | 31737368 | CH | DB | 2 | 0 | 1 | 1 | 1 | 2 | 0 | 1 | 2 | 2 | 1 | 0 | 0 | 0 | 13 |
| Effect of Trans-Nasal E  | IN | OR | 31063573 | KD | CH | 4 | 1 | 1 | 1 | 1 | 2 | 1 | 1 | 2 | 2 | 1 | 2 | 0 | 1 | 20 |
| Effect of ulinastatin co | IN | OR | 31616513 | CH | GS | 3 | 1 | 1 | 1 | 1 | 2 | 1 | 1 | 2 | 2 | 1 | 0 | 0 | 1 | 17 |
| Effect of Using a Card   | IN | OR | 31772537 | CH | KD | 3 | 1 | 1 | 1 | 1 | 2 | 1 | 1 | 0 | 0 | 1 | 2 | 2 | 1 | 17 |
| Effectiveness of the he  | IN | OR | 31988762 | CH | GS | 2 | 1 | 1 | 1 | 1 | 2 | 1 | 1 | 2 | 2 | 1 | 2 | 2 | 1 | 20 |
| Elimination of glutam    | IN | OR | 31557520 | CH | KD | 4 | 1 | 1 | 1 | 1 | 2 | 1 | 1 | 0 | 2 | 1 | 2 | 0 | 1 | 18 |
| EMERGENCY PHYS           | IN | OR | 31031069 | KD | CH | 2 | 1 | 1 | 1 | 1 | 2 | 1 | 1 | 2 | 2 | 1 | 2 | 0 | 1 | 18 |
| Emergent airway mana     | IN | OR | 31795993 | CH | KD | 2 | 1 | 1 | 1 | 1 | 2 | 1 | 1 | 0 | 2 | 1 | 2 | 0 | 1 | 16 |
| End stage renal diseas   | IN | OR | 31796232 | CH | RL | 2 | 1 | 1 | 1 | 1 | 2 | 1 | 1 | 2 | 2 | 1 | 2 | 2 | 1 | 20 |
| Endothelial Dysfuncti    | IN | OR | 31710844 | CH | DC | 4 | 1 | 1 | 1 | 1 | 2 | 1 | 1 | 2 | 2 | 1 | 0 | 0 | 1 | 18 |
| Epinephrine, inodilato   | IN | OR | 31533785 | CH | CH | 2 | 1 | 1 | 1 | 1 | 2 | 1 | 1 | 2 | 2 | 1 | 2 | 2 | 1 | 20 |
| Epinephrine, inodilato   | IN | OR | 31533785 | CH | RL | 2 | 1 | 1 | 1 | 1 | 2 | 1 | 1 | 2 | 2 | 1 | 2 | 2 | 1 | 20 |
| Establishing extracorp   | IN | OR | 30774958 | CH | DC | 2 | 1 | 1 | 1 | 1 | 2 | 0 | 1 | 2 | 0 | 0 | 0 | 0 | 1 | 12 |
| Evaluation of out-of-hc  | IN | OR | 30779977 | CH | DC | 2 | 1 | 1 | 1 | 1 | 2 | 0 | 1 | 2 | 2 | 1 | 2 | 0 | 1 | 17 |
| Evaluation of self-repo  | IN | OR | 31824739 | CH | RL | 2 | 1 | 1 | 1 | 0 | 2 | 1 | 1 | 0 | 0 | 1 | 0 | 0 | 1 | 11 |
| Experience of extracorp  | IN | OR | 30820972 | KD | CH | 2 | 1 | 1 | 1 | 1 | 2 | 1 | 1 | 2 | 2 | 1 | 2 | 0 | 1 | 18 |
| ExtraCorporeal life sup  | IN | OR | 30612896 | CH | RL | 2 | 1 | 1 | 1 | 1 | 2 | 0 | 1 | 0 | 2 | 1 | 2 | 0 | 1 | 15 |
| Extracorporeal membr     | IN | OR | 31462264 | CH | GS | 4 | 1 | 1 | 1 | 1 | 2 | 1 | 1 | 2 | 2 | 1 | 0 | 0 | 1 | 18 |
| Extracorporeal membr     | IN | OR | 31826642 | CH | DB | 2 | 0 | 1 | 1 | 1 | 0 | 0 | 1 | 2 | 2 | 1 | 0 | 0 | 1 | 12 |
| Extracorporeal rewarmi   | IN | OR | 31219201 | CH | DC | 3 | 1 | 1 | 1 | 1 | 2 | 1 | 1 | 2 | 2 | 1 | 0 | 0 | 1 | 17 |
| Extracorporeal rewarmi   | IN | OR | 31219201 | CH | DC | 3 | 1 | 1 | 1 | 1 | 2 | 1 | 1 | 2 | 2 | 1 | 0 | 0 | 1 | 17 |
| Extubation of patients   | IN | OR | 30044174 | CH | DB | 2 | 0 | 1 | 1 | 1 | 0 | 1 | 1 | 2 | 2 | 1 | 2 | 0 | 1 | 15 |
| Factors associated with  | IN | OR | 30845157 | CH | RL | 2 | 1 | 1 | 1 | 1 | 2 | 1 | 1 | 0 | 2 | 1 | 2 | 2 | 1 | 18 |
| Factors associated with  | IN | OR | 30711387 | CH | DB | 1 | 1 | 1 | 1 | 1 | 2 | 1 | 1 | 2 | 2 | 1 | 0 | 0 | 1 | 15 |
| Factors for modifying    | IN | OR | 31129440 | CH | DC | 2 | 1 | 1 | 1 | 1 | 2 | 0 | 1 | 2 | 2 | 1 | 2 | 2 | 1 | 19 |
| Factors Predicting Bac   | IN | OR | 30575443 | CH | GS | 2 | 1 | 1 | 1 | 1 | 2 | 1 | 1 | 2 | 2 | 1 | 2 | 0 | 1 | 18 |
| Female Physician Leac    | IN | OR | 30303843 | CH | RL | 2 | 1 | 1 | 1 | 1 | 0 | 0 | 1 | 0 | 2 | 1 | 0 | 0 | 1 | 11 |
| Forehead electrodes su   | IN | OR | 30788811 | CH | CH | 2 | 1 | 1 | 1 | 1 | 2 | 1 | 1 | 2 | 2 | 1 | 2 | 0 | 1 | 18 |
| Forehead electrodes su   | IN | OR | 30788811 | CH | GS | 2 | 1 | 1 | 1 | 1 | 2 | 1 | 1 | 2 | 2 | 1 | 2 | 0 | 1 | 18 |
| Frailty is associated w  | IN | OR | 31369792 | CH | DB | 2 | 0 | 1 | 1 | 1 | 2 | 1 | 1 | 0 | 2 | 1 | 2 | 2 | 1 | 17 |
| Functional outcomes a    | IN | OR | 31706964 | CH | KD | 2 | 1 | 1 | 1 | 1 | 2 | 1 | 1 | 2 | 2 | 1 | 2 | 0 | 1 | 18 |
| Gender disparities in p  | IN | OR | 30563798 | CH | RL | 2 | 1 | 1 | 1 | 1 | 2 | 0 | 0 | 2 | 2 | 1 | 2 | 2 | 1 | 18 |
| Guideline removal of z   | IN | OR | 30771452 | KD | CH | 2 | 1 | 1 | 1 | 1 | 0 | 0 | 1 | 2 | 2 | 1 | 2 | 2 | 1 | 17 |
| Hospitals' extracorpore  | IN | OR | 30668963 | CH | DB | 2 | 0 | 1 | 1 | 1 | 2 | 1 | 1 | 2 | 2 | 1 | 2 | 2 | 1 | 19 |
| How Feasible is Extra    | IN | OR | 31938615 | CH | DC | 1 | 1 | 1 | 1 | 1 | 2 | 1 | 1 | 2 | 2 | 1 | 0 | 0 | 1 | 15 |
| Hypothermic to ischen    | IN | OR | 31830304 | CH | DC | 4 | 1 | 1 | 1 | 1 | 2 | 1 | 1 | 2 | 2 | 1 | 2 | 0 | 1 | 20 |
| Identification of a pote | IN | OR | 31684934 | CH | DC | 2 | 1 | 1 | 1 | 1 | 2 | 1 | 1 | 0 | 2 | 1 | 2 | 2 | 0 | 17 |
| Impact of Extracorpore   | IN | OR | 31679644 | CH | KD | 2 | 1 | 1 | 1 | 1 | 2 | 1 | 1 | 2 | 2 | 1 | 2 | 2 | 1 | 20 |

|                           |    |    |          |    |    |   |   |   |   |   |   |   |   |   |   |   |   |   |   |    |
|---------------------------|----|----|----------|----|----|---|---|---|---|---|---|---|---|---|---|---|---|---|---|----|
| Impact of Extracorpore    | IN | OR | 31679644 | CH | CH | 2 | 1 | 1 | 1 | 1 | 2 | 1 | 1 | 2 | 2 | 1 | 2 | 0 | 1 | 18 |
| Impact of first docume    | IN | OR | 31108120 | CH | GS | 2 | 1 | 1 | 1 | 1 | 2 | 0 | 1 | 2 | 2 | 1 | 0 | 0 | 1 | 15 |
| Impact of mild therapu    | IN | OR | 30799546 | KD | CH | 3 | 1 | 1 | 1 | 1 | 2 | 1 | 1 | 2 | 2 | 1 | 2 | 2 | 1 | 21 |
| Impact of right ventric   | IN | OR | 30769125 | CH | DB | 2 | 0 | 1 | 1 | 1 | 2 | 1 | 1 | 2 | 2 | 1 | 0 | 0 | 0 | 14 |
| Impact of targeted tem    | IN | OR | 30411236 | CH | DB | 2 | 1 | 1 | 1 | 1 | 2 | 1 | 1 | 0 | 2 | 1 | 2 | 2 | 1 | 18 |
| Implantable cardiovert    | IN | OR | 31145795 | CH | GS | 2 | 1 | 1 | 1 | 1 | 2 | 1 | 1 | 0 | 2 | 1 | 2 | 0 | 1 | 16 |
| Implementation of a L     | IN | OR | 31630977 | CH | DB | 1 | 0 | 1 | 1 | 1 | 2 | 0 | 1 | 2 | 2 | 1 | 2 | 2 | 1 | 17 |
| Implementation of an l    | IN | OR | 31335519 | CH | DC | 2 | 1 | 0 | 0 | 0 | 2 | 1 | 1 | 2 | 2 | 1 | 0 | 0 | 1 | 13 |
| Implementation of an l    | IN | OR | 31335519 | CH | GS | 1 | 1 | 1 | 1 | 1 | 0 | 0 | 1 | 0 | 0 | 1 | 2 | 0 | 0 | 9  |
| Implications of Neurol    | IN | OR | 31320013 | CH | KD | 2 | 1 | 1 | 1 | 1 | 2 | 1 | 1 | 0 | 2 | 1 | 2 | 2 | 1 | 18 |
| In-Hospital Cardiac Ar    | IN | OR | 31772514 | CH | GS | 2 | 1 | 1 | 1 | 1 | 0 | 0 | 1 | 0 | 0 | 1 | 2 | 0 | 0 | 10 |
| In-hospital survival an   | IN | OR | 31080922 | CH | DB | 2 | 0 | 1 | 1 | 1 | 2 | 0 | 1 | 0 | 2 | 1 | 0 | 0 | 1 | 12 |
| Independent risk factor   | IN | OR | 29762083 | CH | DB | 2 | 0 | 1 | 1 | 1 | 2 | 1 | 1 | 0 | 2 | 1 | 2 | 2 | 1 | 17 |
| Influence of glycoprote   | IN | OR | 31300835 | CH | RL | 2 | 1 | 1 | 1 | 1 | 2 | 0 | 1 | 2 | 2 | 1 | 2 | 2 | 0 | 18 |
| Initiation of Extracorp   | IN | OR | 31841997 | CH | CH | 1 | 1 | 1 | 1 | 1 | 2 | 0 | 1 | 0 | 2 | 1 | 2 | 2 | 1 | 16 |
| Initiation of Extracorp   | IN | OR | 31841997 | CH | GS | 2 | 0 | 1 | 1 | 1 | 2 | 0 | 1 | 0 | 2 | 1 | 2 | 2 | 1 | 16 |
| Interaction Effects Bet   | IN | OR | 31414970 | CH | DC | 2 | 1 | 1 | 1 | 1 | 0 | 0 | 1 | 2 | 2 | 1 | 2 | 2 | 0 | 16 |
| Interhospital transfer ir | IN | OR | 30974187 | CH | GS | 2 | 1 | 1 | 1 | 1 | 2 | 1 | 1 | 2 | 2 | 1 | 2 | 0 | 1 | 18 |
| Interventions to reduce   | IN | OR | 30676710 | CH | GS | 1 | 1 | 1 | 1 | 1 | 2 | 1 | 1 | 2 | 2 | 1 | 0 | 0 | 1 | 15 |
| Intra-aortic balloon pu   | IN | OR | 31302105 | CH | RL | 2 | 1 | 1 | 1 | 1 | 2 | 0 | 1 | 0 | 2 | 1 | 2 | 0 | 0 | 14 |
| Intra-hospital transport  | IN | OR | 30835759 | CH | DB | 2 | 0 | 1 | 1 | 1 | 2 | 1 | 1 | 2 | 2 | 1 | 2 | 2 | 1 | 19 |
| Intra-patient potassium   | IN | OR | 31842931 | CH | DB | 2 | 1 | 1 | 1 | 1 | 2 | 1 | 1 | 0 | 2 | 1 | 2 | 2 | 0 | 17 |
| Intracranial pressure an  | IN | OR | 31185256 | KD | CH | 2 | 1 | 1 | 1 | 1 | 2 | 1 | 1 | 0 | 2 | 1 | 2 | 0 | 1 | 16 |
| Intravascular Cooling l   | IN | OR | 30418241 | CH | DC | 3 | 1 | 1 | 1 | 1 | 2 | 1 | 1 | 2 | 2 | 1 | 2 | 0 | 0 | 18 |
| Intravascular Cooling l   | IN | OR | 30418241 | CH | CH | 3 | 1 | 1 | 1 | 1 | 2 | 1 | 1 | 0 | 2 | 0 | 2 | 0 | 1 | 16 |
| Intravascular versus su   | IN | OR | 30795782 | CH | DB | 2 | 0 | 1 | 1 | 1 | 2 | 1 | 1 | 2 | 2 | 1 | 2 | 0 | 1 | 17 |
| Invasive Hemodynami       | IN | OR | 30770091 | CH | DB | 2 | 0 | 1 | 1 | 1 | 2 | 1 | 1 | 2 | 2 | 1 | 0 | 0 | 1 | 15 |
| Laparotomy following      | IN | OR | 30949739 | CH | CH | 2 | 1 | 1 | 1 | 1 | 2 | 1 | 1 | 2 | 2 | 1 | 0 | 0 | 1 | 16 |
| Laparotomy following      | IN | OR | 30949739 | CH | GS | 2 | 1 | 1 | 1 | 1 | 2 | 1 | 1 | 0 | 2 | 1 | 0 | 0 | 1 | 14 |
| Left ventricular wall fi  | IN | OR | 31727121 | CH | DB | 2 | 0 | 1 | 1 | 1 | 2 | 1 | 1 | 2 | 2 | 1 | 2 | 0 | 1 | 17 |
| Left ventricular wall fi  | IN | OR | 31727121 | CH | CH | 2 | 1 | 1 | 1 | 1 | 2 | 1 | 1 | 2 | 2 | 1 | 0 | 0 | 1 | 16 |
| Long-term survival in     | IN | OR | 31470100 | CH | DB | 2 | 0 | 1 | 1 | 1 | 2 | 0 | 1 | 2 | 2 | 1 | 2 | 2 | 1 | 18 |
| Longitudinal explorati    | IN | OR | 30555719 | CH | KD | 2 | 1 | 1 | 0 | 0 | 2 | 0 | 0 | 2 | 2 | 1 | 2 | 0 | 1 | 14 |
| Low rates of immediat     | IN | OR | 31857140 | CH | KD | 2 | 1 | 1 | 1 | 1 | 2 | 1 | 1 | 0 | 2 | 1 | 2 | 2 | 1 | 18 |
| Malignant Arrhythmia      | IN | OR | 31560612 | CH | RL | 3 | 1 | 0 | 1 | 1 | 2 | 1 | 1 | 0 | 2 | 1 | 2 | 2 | 1 | 18 |
| Mechanical chest comf     | IN | OR | 31159737 | KD | CH | 2 | 1 | 1 | 1 | 1 | 2 | 1 | 1 | 2 | 2 | 1 | 0 | 0 | 1 | 16 |
| Mechanism and extent      | IN | OR | 30826528 | CH | RL | 2 | 1 | 1 | 0 | 1 | 2 | 0 | 1 | 2 | 0 | 1 | 2 | 0 | 0 | 13 |
| Mechanisms of early g     | IN | OR | 30908518 | CH | DC | 2 | 1 | 1 | 1 | 1 | 2 | 1 | 1 | 2 | 2 | 1 | 0 | 0 | 1 | 16 |
| Mid-term clinical oute    | IN | OR | 30553557 | CH | RL | 2 | 1 | 1 | 1 | 1 | 2 | 1 | 1 | 2 | 2 | 1 | 2 | 2 | 1 | 20 |
| Mild therapeutic hypot    | IN | OR | 30799547 | CH | DC | 2 | 1 | 1 | 1 | 1 | 2 | 0 | 1 | 2 | 2 | 1 | 0 | 0 | 1 | 15 |
| Mild Therapeutic Hyp      | IN | OR | 30016204 | CH | DC | 2 | 1 | 1 | 1 | 1 | 2 | 1 | 1 | 2 | 2 | 1 | 2 | 0 | 1 | 18 |
| Mortality and costs fol   | IN | OR | 31529353 | CH | KD | 2 | 1 | 1 | 1 | 1 | 2 | 1 | 1 | 0 | 2 | 1 | 2 | 2 | 1 | 18 |
| Myocardial injury and     | IN | OR | 31286469 | CH | RL | 2 | 1 | 1 | 1 | 1 | 2 | 0 | 1 | 0 | 2 | 1 | 2 | 2 | 1 | 17 |
| Near-infrared spectros    | IN | OR | 31088512 | CH | RL | 2 | 1 | 1 | 1 | 1 | 2 | 1 | 1 | 2 | 2 | 1 | 2 | 2 | 0 | 19 |
| Near-infrared spectros    | IN | OR | 31088512 | CH | CH | 4 | 1 | 1 | 1 | 1 | 2 | 1 | 1 | 2 | 2 | 1 | 0 | 0 | 1 | 18 |
| Neurologic outcomes i     | IN | OR | 30981847 | CH | DB | 2 | 0 | 1 | 1 | 1 | 2 | 1 | 0 | 2 | 2 | 1 | 2 | 2 | 0 | 17 |
| Neurophysiological Fi     | IN | OR | 31823652 | CH | RL | 2 | 1 | 1 | 1 | 1 | 2 | 0 | 1 | 2 | 2 | 1 | 2 | 2 | 1 | 19 |
| New Termination-of-R      | IN | OR | 31050224 | CH | GS | 2 | 1 | 1 | 1 | 1 | 2 | 1 | 1 | 2 | 2 | 1 | 2 | 2 | 1 | 20 |
| Nursing roles for in-hc   | IN | OR | 31420410 | CH | RL | 2 | 1 | 0 | 0 | 1 | 2 | 1 | 1 | 2 | 2 | 1 | 2 | 2 | 1 | 18 |
| Nutrition During Targ     | IN | OR | 31006879 | KD | CH | 2 | 1 | 1 | 1 | 1 | 2 | 1 | 1 | 2 | 2 | 1 | 2 | 1 | 1 | 19 |
| Nutrition during target   | IN | OR | 31006879 | CH | DB | 2 | 1 | 1 | 1 | 1 | 2 | 1 | 1 | 2 | 2 | 1 | 2 | 0 | 1 | 18 |
| One-year longitudinal     | IN | OR | 31272987 | CH | DC | 2 | 1 | 1 | 1 | 1 | 2 | 1 | 1 | 2 | 0 | 0 | 0 | 0 | 1 | 13 |
| Optimal Arterial Bloo     | IN | OR | 31356478 | CH | GS | 2 | 1 | 1 | 1 | 1 | 2 | 1 | 1 | 2 | 2 | 1 | 2 | 2 | 1 | 20 |

|                          |    |    |          |    |    |   |   |   |   |   |   |   |   |   |   |   |   |   |   |    |
|--------------------------|----|----|----------|----|----|---|---|---|---|---|---|---|---|---|---|---|---|---|---|----|
| Optimal combination of   | IN | OR | 31411632 | CH | DB | 2 | 1 | 1 | 1 | 1 | 2 | 1 | 1 | 2 | 2 | 1 | 2 | 0 | 1 | 18 |
| Optimal extracorporeal   | IN | OR | 31988761 | CH | DC | 2 | 1 | 1 | 1 | 1 | 2 | 1 | 1 | 2 | 2 | 1 | 2 | 0 | 1 | 18 |
| Organ blood flow and     | IN | OR | 30375081 | CH | DC | 3 | 1 | 1 | 1 | 0 | 2 | 1 | 1 | 0 | 2 | 1 | 0 | 0 | 1 | 14 |
| Organ blood flow and     | IN | OR | 30375081 | CH | CH | 3 | 1 | 1 | 1 | 0 | 2 | 1 | 1 | 0 | 2 | 0 | 0 | 0 | 1 | 13 |
| Out of hospital cardiac  | IN | OR | 31815873 | CH | GS | 2 | 1 | 1 | 1 | 1 | 2 | 1 | 1 | 2 | 0 | 0 | 0 | 0 | 0 | 12 |
| Out-of-hospital transe   | IN | OR | 30957698 | CH | DB | 1 | 0 | 1 | 1 | 1 | 0 | 0 | 0 | 2 | 2 | 1 | 2 | 0 | 1 | 12 |
| Outcomes associated w    | IN | OR | 31255419 | CH | DB | 2 | 0 | 1 | 1 | 1 | 2 | 1 | 1 | 0 | 2 | 1 | 2 | 0 | 1 | 15 |
| Outcomes of Coronary     | IN | OR | 31089443 | KD | CH | 2 | 1 | 1 | 0 | 0 | 2 | 1 | 1 | 0 | 2 | 0 | 0 | 0 | 1 | 11 |
| Outcomes of extracorp    | IN | OR | 31486571 | CH | KD | 2 | 1 | 1 | 1 | 1 | 2 | 0 | 1 | 0 | 2 | 1 | 2 | 2 | 1 | 17 |
| Outcomes of Impella C    | IN | OR | 31891791 | CH | GS | 2 | 0 | 1 | 1 | 1 | 0 | 0 | 1 | 0 | 2 | 1 | 0 | 0 | 1 | 10 |
| Partial pressure of arte | IN | OR | 30452939 | CH | GS | 2 | 1 | 1 | 1 | 1 | 2 | 0 | 1 | 2 | 2 | 1 | 2 | 2 | 1 | 19 |
| Partial pressure of arte | IN | OR | 30452939 | CH | CH | 1 | 1 | 1 | 1 | 1 | 2 | 0 | 1 | 2 | 2 | 1 | 2 | 2 | 1 | 18 |
| Patient and hospital fa  | IN | OR | 30885828 | CH | KD | 2 | 1 | 1 | 1 | 1 | 2 | 0 | 1 | 2 | 2 | 1 | 2 | 0 | 1 | 17 |
| Patients With Refracto   | IN | OR | 30890669 | CH | DC | 2 | 1 | 1 | 1 | 1 | 2 | 0 | 1 | 2 | 2 | 1 | 2 | 2 | 1 | 19 |
| Pilot study on a rewan   | IN | OR | 30781943 | KD | CH | 2 | 1 | 1 | 1 | 1 | 2 | 1 | 1 | 2 | 2 | 1 | 2 | 0 | 1 | 18 |
| Plasma proteomic char    | IN | OR | 31316602 | CH | DC | 2 | 1 | 1 | 1 | 1 | 2 | 1 | 1 | 2 | 2 | 1 | 0 | 0 | 1 | 16 |
| Platelet dysfunction af  | IN | OR | 30716426 | CH | DC | 2 | 1 | 1 | 1 | 1 | 2 | 1 | 1 | 0 | 0 | 0 | 0 | 0 | 1 | 11 |
| Postarrest steroid use i | IN | OR | 30308548 | CH | DB | 2 | 1 | 1 | 1 | 1 | 2 | 1 | 1 | 2 | 2 | 1 | 2 | 0 | 1 | 18 |
| Predictors of Futility i | IN | OR | 30376419 | CH | RL | 2 | 1 | 1 | 1 | 1 | 2 | 1 | 1 | 2 | 2 | 1 | 2 | 2 | 1 | 20 |
| PREDICTORS OF SU         | IN | OR | 30080744 | CH | KD | 2 | 1 | 1 | 1 | 1 | 2 | 1 | 1 | 0 | 2 | 1 | 2 | 0 | 1 | 16 |
| Predictors of Survival   | IN | OR | 30312208 | CH | DC | 2 | 1 | 1 | 1 | 1 | 2 | 1 | 0 | 2 | 2 | 1 | 0 | 0 | 1 | 15 |
| Prevention of Early Ve   | IN | OR | 31693806 | CH | RL | 4 | 1 | 1 | 0 | 1 | 2 | 1 | 0 | 2 | 2 | 1 | 2 | 2 | 1 | 20 |
| Prognostic Factors for   | IN | OR | 31480615 | CH | DC | 2 | 1 | 1 | 1 | 1 | 2 | 0 | 1 | 2 | 2 | 1 | 0 | 0 | 1 | 15 |
| Prolonged targeted ter   | IN | OR | 30572070 | CH | GS | 2 | 1 | 1 | 1 | 1 | 2 | 1 | 1 | 2 | 2 | 1 | 2 | 2 | 1 | 20 |
| Questionnaire survey on  | IN | OR | 31178438 | CH | DB | 1 | 0 | 1 | 1 | 1 | 2 | 1 | 1 | 2 | 2 | 1 | 2 | 2 | 1 | 18 |
| RBM3 and CIRP expr       | IN | OR | 31821351 | CH | DB | 2 | 0 | 1 | 1 | 1 | 2 | 1 | 1 | 2 | 2 | 1 | 2 | 0 | 1 | 17 |
| Real-time compressor     | IN | OR | 30693086 | KD | CH | 4 | 1 | 1 | 1 | 1 | 2 | 1 | 1 | 2 | 2 | 1 | 2 | 2 | 1 | 22 |
| Real-time quantitative   | IN | OR | 29283290 | CH | GS | 4 | 1 | 1 | 1 | 1 | 2 | 1 | 1 | 2 | 2 | 1 | 2 | 0 | 1 | 20 |
| Real-world clinical exp  | IN | OR | 31028475 | CH | DC | 2 | 1 | 1 | 0 | 1 | 2 | 1 | 1 | 2 | 0 | 0 | 0 | 0 | 1 | 12 |
| Realistic Evaluation of  | IN | OR | 29768987 | CH | GS | 2 | 1 | 1 | 1 | 1 | 2 | 1 | 1 | 2 | 0 | 1 | 2 | 0 | 0 | 15 |
| Relationship between t   | IN | OR | 30359876 | CH | KD | 2 | 1 | 1 | 1 | 1 | 2 | 1 | 1 | 2 | 2 | 1 | 2 | 0 | 0 | 17 |
| Renal function after ou  | IN | OR | 31068215 | CH | GS | 3 | 1 | 1 | 1 | 1 | 2 | 1 | 1 | 2 | 2 | 1 | 2 | 0 | 1 | 19 |
| Reported practice of te  | IN | OR | 30857515 | CH | CH | 1 | 1 | 1 | 1 | 0 | 2 | 0 | 1 | 0 | 0 | 1 | 0 | 0 | 0 | 8  |
| Reported practice of te  | IN | OR | 30857515 | CH | GS | 1 | 1 | 1 | 1 | 0 | 2 | 0 | 1 | 0 | 0 | 1 | 0 | 0 | 0 | 8  |
| Resistin and Cardiac A   | IN | OR | 31881807 | CH | KD | 2 | 1 | 1 | 1 | 0 | 0 | 1 | 1 | 0 | 2 | 1 | 0 | 0 | 1 | 11 |
| Results of targeted ter  | IN | OR | 31736476 | CH | RL | 2 | 1 | 1 | 1 | 1 | 0 | 0 | 1 | 2 | 2 | 1 | 2 | 2 | 1 | 17 |
| Retrospective cohort st  | IN | OR | 31060580 | CH | RL | 2 | 1 | 1 | 1 | 1 | 2 | 1 | 1 | 2 | 2 | 1 | 2 | 2 | 1 | 20 |
| Revealed by degrees: F   | IN | OR | 30589946 | CH | RL | 2 | 1 | 0 | 1 | 1 | 2 | 1 | 0 | 2 | 2 | 1 | 2 | 2 | 1 | 18 |
| Risk of mortality asso   | IN | OR | 31296365 | CH | DB | 2 | 0 | 1 | 1 | 1 | 2 | 1 | 0 | 0 | 2 | 1 | 2 | 2 | 1 | 16 |
| Role of coronary angic   | IN | OR | 31237435 | CH | DB | 4 | 0 | 1 | 0 | 1 | 2 | 1 | 1 | 2 | 2 | 1 | 2 | 0 | 1 | 18 |
| Selective retrograde ce  | IN | OR | 31950100 | CH | DC | 3 | 1 | 1 | 1 | 0 | 0 | 0 | 1 | 2 | 2 | 0 | 2 | 0 | 1 | 14 |
| Short and long-term st   | IN | OR | 31470101 | CH | RL | 2 | 1 | 1 | 1 | 1 | 2 | 0 | 0 | 0 | 2 | 1 | 2 | 2 | 1 | 16 |
| Short and long-term st   | IN | OR | 31470101 | CH | CH | 2 | 1 | 1 | 1 | 1 | 2 | 0 | 0 | 2 | 2 | 1 | 0 | 0 | 1 | 14 |
| Shorter defibrillation i | IN | OR | 31442471 | CH | RL | 3 | 1 | 1 | 1 | 1 | 0 | 1 | 1 | 2 | 2 | 1 | 2 | 2 | 1 | 19 |
| Standardising commur     | IN | OR | 31891790 | CH | DB | 3 | 0 | 1 | 1 | 1 | 2 | 1 | 1 | 2 | 2 | 1 | 2 | 0 | 1 | 18 |
| Study on the timing o    | IN | OR | 30612965 | KD | CH | 2 | 1 | 1 | 1 | 1 | 2 | 1 | 1 | 0 | 0 | 1 | 0 | 0 | 1 | 12 |
| Subphenotypes of Can     | IN | OR | 31541172 | CH | CH | 1 | 1 | 1 | 1 | 1 | 2 | 1 | 1 | 2 | 2 | 1 | 0 | 0 | 1 | 15 |
| Subphenotypes of Can     | IN | OR | 31541172 | CH | RL | 2 | 1 | 1 | 1 | 0 | 2 | 1 | 1 | 2 | 2 | 1 | 0 | 0 | 1 | 15 |
| Surface Body Tempera     | IN | OR | 30566033 | CH | RL | 2 | 1 | 0 | 1 | 1 | 2 | 1 | 1 | 2 | 2 | 1 | 2 | 2 | 1 | 19 |
| Survival and neurologi   | IN | OR | 30572065 | CH | DC | 2 | 1 | 1 | 1 | 1 | 2 | 1 | 1 | 0 | 2 | 1 | 2 | 0 | 1 | 16 |
| Survival to hospital di  | IN | OR | 30708074 | KD | CH | 2 | 1 | 1 | 1 | 1 | 2 | 1 | 1 | 2 | 2 | 1 | 2 | 0 | 1 | 18 |
| Target Temperature Mi    | IN | OR | 30270729 | CH | KD | 2 | 1 | 1 | 1 | 1 | 2 | 1 | 1 | 2 | 2 | 1 | 2 | 0 | 1 | 18 |
| Targeted hypothermia     | IN | OR | 31473324 | CH | DB | 4 | 0 | 0 | 0 | 0 | 0 | 0 | 1 | 2 | 2 | 1 | 0 | 0 | 0 | 10 |

|                          |     |    |          |    |    |   |   |   |   |   |   |   |   |   |   |   |   |   |   |    |
|--------------------------|-----|----|----------|----|----|---|---|---|---|---|---|---|---|---|---|---|---|---|---|----|
| Targeted Temperature l   | IN  | OR | 31809279 | CH | GS | 2 | 0 | 1 | 1 | 1 | 2 | 0 | 1 | 2 | 2 | 1 | 2 | 0 | 0 | 15 |
| Targeted Temperature l   | IN  | OR | 31577396 | CH | GS | 3 | 1 | 1 | 1 | 1 | 2 | 1 | 1 | 2 | 2 | 1 | 2 | 2 | 1 | 21 |
| Targeted Temperature l   | IN  | OR | 31314693 | KD | CH | 2 | 1 | 1 | 1 | 1 | 2 | 1 | 1 | 2 | 2 | 1 | 2 | 0 | 1 | 18 |
| Targeted temperature n   | IN  | OR | 31745738 | CH | KD | 2 | 1 | 1 | 1 | 1 | 2 | 1 | 1 | 0 | 2 | 1 | 2 | 0 | 1 | 16 |
| Targeted temperature n   | IN  | OR | 31146629 | CH | DB | 1 | 0 | 0 | 1 | 1 | 0 | 1 | 1 | 2 | 2 | 1 | 0 | 0 | 1 | 11 |
| Targeted Temperature l   | IN  | OR | 31390319 | CH | GS | 2 | 1 | 1 | 1 | 1 | 2 | 1 | 1 | 2 | 2 | 1 | 2 | 2 | 1 | 20 |
| Temporal trends in the   | IN  | OR | 31796127 | CH | RL | 2 | 1 | 1 | 1 | 1 | 2 | 1 | 1 | 2 | 2 | 1 | 2 | 2 | 1 | 20 |
| Temporal trends of sur   | IN  | OR | 30790415 | CH | RL | 2 | 1 | 1 | 1 | 1 | 0 | 0 | 1 | 2 | 2 | 1 | 2 | 2 | 1 | 17 |
| The acute respiratory d  | IN  | OR | 30654012 | CH | GS | 2 | 1 | 1 | 1 | 1 | 2 | 0 | 1 | 2 | 2 | 1 | 2 | 0 | 1 | 17 |
| The advocacy role of n   | IN  | OR | 31113269 | CH | GS | 1 | 1 | 1 | 1 | 1 | 2 | 1 | 1 | 2 | 0 | 1 | 0 | 0 | 0 | 12 |
| The balance of thromb    | IN  | OR | 31682901 | CH | CH | 2 | 1 | 1 | 1 | 1 | 2 | 1 | 1 | 2 | 2 | 1 | 0 | 0 | 1 | 16 |
| The balance of thromb    | IN  | OR | 31682901 | CH | DC | 2 | 1 | 1 | 1 | 1 | 2 | 1 | 1 | 2 | 2 | 1 | 0 | 0 | 1 | 16 |
| The Burden of Brain F    | IN  | OR | 30889022 | CH | DB | 2 | 0 | 1 | 1 | 1 | 2 | 1 | 1 | 2 | 2 | 1 | 2 | 0 | 1 | 17 |
| The cardiac arrest survi | IN  | OR | 31539610 | CH | DC | 2 | 1 | 1 | 1 | 1 | 2 | 0 | 1 | 2 | 2 | 1 | 2 | 0 | 1 | 17 |
| The Early Initiation of  | IN  | OR | 30713299 | CH | DC | 2 | 1 | 1 | 1 | 1 | 2 | 0 | 1 | 2 | 2 | 1 | 2 | 2 | 1 | 19 |
| The effect of extracorp  | IN  | OR | 31146644 | CH | RL | 2 | 1 | 1 | 1 | 1 | 2 | 1 | 1 | 2 | 2 | 1 | 2 | 2 | 1 | 20 |
| The effects of thoracic  | IN  | OR | 31238036 | CH | SC | 2 | 1 | 1 | 1 | 1 | 2 | 1 | 1 | 0 | 0 | 1 | 2 | 0 | 1 | 14 |
| The Evolving Role of     | IN  | OR | 30760026 | KD | CH | 1 | 1 | 1 | 1 | 1 | 2 | 1 | 1 | 2 | 2 | 1 | 2 | 2 | 1 | 19 |
| The impact of double s   | IN  | OR | 31059670 | KD | CH | 2 | 1 | 1 | 1 | 1 | 2 | 1 | 1 | 2 | 2 | 1 | 2 | 2 | 1 | 20 |
| The Impact of Emerger    | IN  | OR | 31934452 | CH | KD | 2 | 1 | 1 | 1 | 1 | 2 | 1 | 1 | 2 | 2 | 1 | 2 | 2 | 1 | 20 |
| The impact of nurse st   | IN  | OR | 31752859 | CH | RL | 2 | 1 | 1 | 1 | 1 | 2 | 1 | 1 | 2 | 2 | 1 | 2 | 2 | 0 | 19 |
| The impact of proactiv   | IN  | OR | 30409047 | CH | DC | 2 | 1 | 1 | 1 | 1 | 0 | 0 | 1 | 2 | 2 | 1 | 2 | 2 | 1 | 17 |
| The impact of real-tim   | IN  | OR | 31446232 | KD | CH | 2 | 1 | 1 | 1 | 1 | 2 | 1 | 1 | 2 | 2 | 1 | 2 | 2 | 1 | 20 |
| The National Early We    | IN  | OR | 30516860 | CH | DB | 2 | 1 | 1 | 1 | 1 | 2 | 1 | 1 | 2 | 2 | 1 | 2 | 0 | 1 | 18 |
| The performance of a n   | IN  | OR | 31377393 | CH | DC | 2 | 1 | 1 | 1 | 1 | 2 | 1 | 1 | 2 | 2 | 1 | 2 | 2 | 1 | 20 |
| The prevalence of psyc   | IN  | OR | 30735740 | CH | GS | 2 | 1 | 1 | 1 | 1 | 2 | 1 | 1 | 2 | 2 | 1 | 2 | 2 | 1 | 20 |
| The related factors for  | IN  | OR | 30702602 | CH | DB | 2 | 0 | 1 | 1 | 1 | 2 | 0 | 1 | 2 | 2 | 1 | 0 | 0 | 0 | 13 |
| The urine biomarkers     | IN  | OR | 31216431 | CH | RL | 2 | 1 | 1 | 1 | 1 | 2 | 1 | 1 | 2 | 2 | 1 | 2 | 2 | 1 | 20 |
| The Use of ECMO for      | IN  | OR | 29303029 | CH | KD | 2 | 1 | 1 | 1 | 0 | 0 | 0 | 1 | 0 | 2 | 1 | 2 | 0 | 1 | 12 |
| Therapeutic Hypotherm    | IN  | OR | 30052584 | CH | RL | 2 | 1 | 1 | 1 | 0 | 2 | 1 | 1 | 0 | 2 | 1 | 0 | 0 | 1 | 13 |
| Therapeutic hypotherm    | IN  | OR | 31950096 | CH | KD | 2 | 1 | 1 | 1 | 0 | 0 | 0 | 1 | 2 | 2 | 1 | 2 | 0 | 1 | 14 |
| Therapeutic hypotherm    | IN  | OR | 31950096 | CH | CH | 2 | 1 | 1 | 1 | 0 | 0 | 0 | 1 | 2 | 2 | 1 | 2 | 0 | 1 | 14 |
| Therapeutic hypotherm    | IN  | OR | 31223012 | CH | GS | 2 | 1 | 1 | 1 | 0 | 2 | 1 | 1 | 2 | 2 | 1 | 2 | 0 | 0 | 16 |
| Transesophageal Echoc    | IN  | OR | 30773413 | CH | DC | 2 | 1 | 1 | 1 | 1 | 2 | 0 | 1 | 2 | 2 | 1 | 2 | 0 | 1 | 17 |
| Transesophageal echoc    | IN  | OR | 30862393 | CH | GS | 1 | 0 | 0 | 0 | 0 | 0 | 0 | 0 | 0 | 2 | 1 | 0 | 2 | 1 | 7  |
| Trends Over Time in I    | IN  | OR | 30407950 | CH | DC | 2 | 1 | 1 | 1 | 1 | 2 | 0 | 1 | 2 | 2 | 1 | 0 | 0 | 1 | 15 |
| Use of automated exte    | IN  | OR | 29116359 | CH | DB | 2 | 1 | 1 | 1 | 1 | 2 | 0 | 1 | 2 | 2 | 1 | 0 | 0 | 1 | 15 |
| Usefulness of Intra-aor  | IN  | OR | 30577950 | CH | GS | 2 | 1 | 1 | 1 | 1 | 2 | 0 | 1 | 2 | 2 | 1 | 0 | 0 | 1 | 15 |
| Usefulness of Therape    | IN  | OR | 31371900 | CH | RL | 2 | 1 | 1 | 1 | 1 | 0 | 0 | 1 | 0 | 2 | 1 | 2 | 2 | 1 | 15 |
| Validating the Electror  | IN  | OR | 31082902 | CH | RL | 2 | 1 | 1 | 1 | 1 | 2 | 0 | 1 | 2 | 2 | 1 | 2 | 2 | 1 | 19 |
| Validation of Early Wi   | IN  | OR | 31567342 | CH | KD | 2 | 1 | 1 | 1 | 1 | 2 | 1 | 1 | 2 | 0 | 0 | 2 | 2 | 1 | 17 |
| Variation in outcomes    | IN  | OR | 30590071 | CH | DC | 2 | 1 | 1 | 1 | 1 | 2 | 0 | 1 | 2 | 2 | 1 | 2 | 2 | 1 | 19 |
| Venous Pooling in Su     | IN  | OR | 31843349 | CH | RL | 3 | 1 | 0 | 0 | 1 | 0 | 0 | 0 | 0 | 0 | 0 | 0 | 0 | 1 | 6  |
| Venovenous Extracorp     | IN  | OR | 31182376 | CH | GS | 2 | 1 | 1 | 1 | 1 | 2 | 1 | 1 | 0 | 2 | 1 | 0 | 0 | 1 | 14 |
| Ventilator settings and  | IN  | OR | 31719587 | CH | DC | 2 | 1 | 1 | 1 | 1 | 0 | 0 | 1 | 0 | 0 | 0 | 0 | 0 | 1 | 8  |
| Vitamin K deficiency i   | IN  | OR | 30415179 | CH | DB | 2 | 0 | 1 | 1 | 1 | 2 | 0 | 1 | 2 | 2 | 1 | 0 | 0 | 1 | 14 |
| Vitamin K deficiency i   | IN  | OR | 30415179 | CH | CH | 2 | 1 | 1 | 1 | 1 | 2 | 0 | 1 | 2 | 2 | 1 | 0 | 0 | 1 | 15 |
| Yellow Means Caution     | IN  | OR | 30312207 | CH | GS | 2 | 1 | 1 | 1 | 1 | 2 | 0 | 1 | 0 | 2 | 0 | 0 | 0 | 1 | 12 |
| Patient and hospital fa  | IN  | OR | 30885828 | CH | RL | 2 | 1 | 1 | 1 | 1 | 2 | 0 | 1 | 2 | 2 | 1 | 0 | 0 | 1 | 15 |
| A descriptive analysis   | PED | OR | 31136809 | LA | MT | 2 | 1 | 1 | 1 | 1 | 2 | 0 | 1 | 2 | 2 | 1 | 2 | 2 | 1 | 19 |
| A mobile device app to   | PED | OR | 30797722 | LA | MT | 4 | 1 | 1 | 1 | 1 | 2 | 0 | 1 | 2 | 2 | 1 | 2 | 2 | 1 | 21 |
| A Pulse Check on Lea     | PED | OR | 31842200 | LA | ME | 2 | 1 | 1 | 1 | 1 | 2 | 1 | 1 | 0 | 0 | 1 | 2 | 2 | 1 | 16 |
| Arterial blood pressure  | PED | OR | 31246109 | LA | MT | 2 | 1 | 1 | 1 | 1 | 2 | 1 | 1 | 2 | 2 | 1 | 2 | 2 | 1 | 20 |

|                         |     |    |          |    |     |   |   |   |   |   |   |   |   |   |   |   |   |   |   |    |
|-------------------------|-----|----|----------|----|-----|---|---|---|---|---|---|---|---|---|---|---|---|---|---|----|
| Association of diastoli | PED | OR | 31390531 | LA | LA  | 3 | 1 | 1 | 1 | 1 | 2 | 1 | 1 | 2 | 2 | 1 | 0 | 0 | 1 | 17 |
| Association of diastoli | PED | OR | 31390531 | LA | EG  | 2 | 1 | 1 | 1 | 1 | 2 | 1 | 1 | 2 | 2 | 1 | 0 | 0 | 1 | 16 |
| Association of school   | PED | OR | 31565076 | LA | SRK | 2 | 1 | 1 | 1 | 1 | 2 | 1 | 1 | 0 | 2 | 1 | 0 | 0 | 1 | 14 |
| Avalidation study of tl | PED | OR | 31155643 | LA | MT  | 2 | 1 | 1 | 1 | 1 | 2 | 0 | 1 | 0 | 2 | 1 | 2 | 0 | 1 | 15 |
| Cardiac Arrest in the P | PED | OR | 30785870 | LA | ME  | 2 | 1 | 1 | 1 | 1 | 2 | 1 | 1 | 2 | 2 | 1 | 0 | 0 | 1 | 16 |
| Cardiac Arrest Outcom   | PED | OR | 30807545 | LA | ME  | 2 | 1 | 1 | 1 | 1 | 2 | 1 | 1 | 0 | 2 | 1 | 0 | 0 | 1 | 14 |
| Cardiopulmonary Rest    | PED | OR | 31232852 | LA | EG  | 2 | 1 | 1 | 1 | 1 | 2 | 1 | 1 | 2 | 0 | 1 | 0 | 0 | 1 | 14 |
| Catecholaminergic Pol   | PED | OR | 30640888 | LA | ME  | 1 | 0 | 0 | 0 | 0 | 2 | 1 | 1 | 2 | 2 | 1 | 2 | 2 | 1 | 15 |
| Cerebral microcirculatc | PED | OR | 29192562 | LA | ME  | 3 | 1 | 1 | 1 | 1 | 2 | 1 | 1 | 0 | 2 | 1 | 0 | 0 | 1 | 15 |
| Changing Risk of In-F   | PED | OR | 30591395 | LA | MT  | 2 | 1 | 1 | 1 | 1 | 2 | 0 | 1 | 2 | 2 | 1 | 0 | 0 | 1 | 15 |
| Characteristics and out | PED | OR | 31785372 | LA | MN  | 2 | 1 | 1 | 0 | 0 | 2 | 1 | 1 | 0 | 0 | 1 | 0 | 0 | 1 | 10 |
| Clinical Survey and P1  | PED | OR | 31065052 | LA | ME  | 2 | 1 | 1 | 1 | 1 | 2 | 1 | 1 | 2 | 2 | 1 | 0 | 0 | 1 | 16 |
| Combination of Early    | PED | OR | 31214555 | LA | SK  | 2 | 1 | 1 | 1 | 1 | 2 | 1 | 1 | 0 | 0 | 1 | 2 | 0 | 1 | 14 |
| Comparison between r    | PED | OR | 30854750 | LA | EG  | 3 | 1 | 1 | 1 | 1 | 2 | 1 | 1 | 0 | 2 | 1 | 2 | 0 | 1 | 17 |
| Comparison between s    | PED | OR | 31318890 | LA | MB  | 4 | 1 | 0 | 1 | 1 | 2 | 1 | 1 | 0 | 2 | 1 | 0 | 0 | 1 | 15 |
| Comparison of In-Hos    | PED | OR | 31703806 | LA | MB  | 2 | 1 | 1 | 1 | 1 | 0 | 0 | 1 | 0 | 2 | 1 | 0 | 2 | 1 | 13 |
| Contemporary Outcom     | PED | OR | 30542921 | LA | SRK | 2 | 1 | 1 | 1 | 1 | 2 | 1 | 1 | 0 | 0 | 0 | 2 | 0 | 1 | 13 |
| Creation of an empiric  | PED | OR | 30342418 | LA | EG  | 2 | 0 | 1 | 1 | 1 | 2 | 1 | 1 | 2 | 2 | 1 | 0 | 2 | 0 | 16 |
| Decline in incidence of | PED | OR | 30809645 | LA | MB  | 2 | 1 | 1 | 1 | 1 | 0 | 1 | 0 | 2 | 2 | 1 | 0 | 0 | 1 | 13 |
| Decline in incidence of | PED | OR | 30809645 | LA | LA  | 2 | 1 | 1 | 1 | 1 | 0 | 0 | 0 | 2 | 2 | 1 | 0 | 0 | 1 | 12 |
| Defining benefit thresh | PED | OR | 31888705 | LA | ME  | 2 | 1 | 1 | 1 | 1 | 2 | 1 | 1 | 2 | 0 | 0 | 0 | 0 | 1 | 13 |
| Development and Eval    | PED | OR | 31218374 | LA | MB  | 4 | 1 | 1 | 1 | 1 | 2 | 1 | 0 | 0 | 2 | 1 | 2 | 2 | 1 | 19 |
| Development of a Nov    | PED | OR | 31411652 | LA | MT  | 2 | 1 | 1 | 1 | 1 | 2 | 1 | 1 | 0 | 2 | 1 | 2 | 2 | 1 | 18 |
| Development of a Nov    | PED | OR | 31411652 | LA | LA  | 2 | 1 | 1 | 1 | 1 | 2 | 1 | 1 | 2 | 2 | 1 | 2 | 0 | 1 | 18 |
| Developmental Outcor    | PED | OR | 30850900 | LA | MT  | 2 | 1 | 1 | 1 | 1 | 2 | 1 | 1 | 2 | 2 | 1 | 2 | 2 | 1 | 20 |
| Dispatcher-assisted car | PED | OR | 30999084 | LA | MB  | 2 | 1 | 0 | 1 | 1 | 2 | 1 | 0 | 0 | 2 | 1 | 0 | 2 | 1 | 14 |
| Dispatcher-assisted car | PED | OR | 30999084 | LA | MN  | 2 | 1 | 1 | 1 | 1 | 2 | 1 | 0 | 2 | 2 | 1 | 0 | 0 | 1 | 15 |
| Dispatcher-Assisted C:  | PED | OR | 29200138 | LA | MB  | 2 | 1 | 1 | 1 | 1 | 2 | 0 | 0 | 0 | 2 | 1 | 0 | 0 | 1 | 12 |
| Early and long-term ot  | PED | OR | 31608760 | LA | SRK | 2 | 1 | 1 | 1 | 1 | 0 | 0 | 1 | 2 | 2 | 0 | 2 | 0 | 1 | 14 |
| Early EEG Features fo   | PED | OR | 31033654 | LA | LA  | 2 | 1 | 1 | 1 | 1 | 2 | 1 | 1 | 2 | 2 | 1 | 2 | 2 | 1 | 20 |
| Early EEG Features fo   | PED | OR | 31033654 | LA | MT  | 2 | 1 | 1 | 1 | 1 | 2 | 1 | 0 | 2 | 2 | 1 | 2 | 2 | 1 | 19 |
| Early Epinephrine Imp   | PED | OR | 31245334 | LA | MN  | 2 | 1 | 1 | 0 | 1 | 2 | 1 | 1 | 0 | 2 | 1 | 0 | 0 | 1 | 13 |
| Early identification of | PED | OR | 31496467 | LA | EG  | 2 | 1 | 1 | 1 | 1 | 2 | 1 | 1 | 0 | 2 | 1 | 0 | 0 | 1 | 14 |
| Early On-Scene Manag    | PED | OR | 30412719 | LA | ME  | 2 | 1 | 1 | 1 | 1 | 2 | 1 | 1 | 2 | 2 | 1 | 2 | 2 | 1 | 20 |
| Effect of metronome g   | PED | OR | 30850868 | LA | MT  | 4 | 1 | 1 | 1 | 1 | 2 | 1 | 1 | 2 | 2 | 1 | 2 | 2 | 1 | 22 |
| Effectiveness of a High | PED | OR | 27763955 | LA | MB  | 3 | 1 | 1 | 1 | 1 | 2 | 1 | 1 | 0 | 2 | 1 | 2 | 2 | 1 | 19 |
| Effectiveness of a High | PED | OR | 27763955 | LA | LA  | 3 | 1 | 1 | 1 | 1 | 2 | 1 | 1 | 2 | 2 | 1 | 0 | 0 | 1 | 17 |
| Electroencephalographi  | PED | OR | 31560988 | LA | SRK | 2 | 1 | 1 | 1 | 1 | 2 | 1 | 1 | 0 | 2 | 1 | 2 | 2 | 1 | 18 |
| Epidemiologic Trends    | PED | OR | 31246741 | LA | ME  | 2 | 1 | 1 | 0 | 1 | 2 | 1 | 1 | 2 | 2 | 1 | 2 | 2 | 1 | 19 |
| Epidemiology and aeti   | PED | OR | 30262513 | LA | EG  | 2 | 1 | 1 | 1 | 1 | 2 | 1 | 1 | 0 | 2 | 1 | 0 | 0 | 1 | 14 |
| Epidemiology of Brair   | PED | OR | 30882855 | LA | MN  | 2 | 1 | 1 | 1 | 1 | 2 | 1 | 1 | 0 | 0 | 1 | 0 | 0 | 0 | 11 |
| Epidemiology of Sudd    | PED | OR | 31013114 | LA | SC  | 1 | 1 | 1 | 1 | 1 | 2 | 1 | 1 | 2 | 0 | 1 | 0 | 0 | 1 | 13 |
| Exercise testing oversi | PED | OR | 30763784 | LA | MN  | 2 | 1 | 1 | 1 | 1 | 2 | 1 | 1 | 0 | 2 | 1 | 2 | 2 | 1 | 18 |
| Extracorporeal Cardiop  | PED | OR | 31496406 | LA | MT  | 2 | 1 | 1 | 1 | 1 | 2 | 1 | 1 | 2 | 2 | 1 | 2 | 2 | 1 | 20 |
| Extracorporeal cardiop  | PED | OR | 30515882 | LA | MN  | 2 | 1 | 1 | 1 | 1 | 2 | 1 | 1 | 0 | 2 | 1 | 2 | 2 | 1 | 18 |
| Extracorporeal cardiop  | PED | OR | 30515882 | LA | LA  | 2 | 1 | 1 | 1 | 1 | 0 | 0 | 1 | 0 | 2 | 1 | 0 | 0 | 1 | 11 |
| Five-year survival, per | PED | OR | 31296978 | LA | SK  | 2 | 1 | 1 | 1 | 1 | 2 | 0 | 1 | 0 | 2 | 1 | 2 | 0 | 1 | 15 |
| Functional outcomes a   | PED | OR | 31404636 | LA | MB  | 2 | 1 | 1 | 1 | 1 | 2 | 0 | 1 | 0 | 2 | 1 | 0 | 0 | 1 | 13 |
| Hemodynamic effects c   | PED | OR | 30946924 | LA | LA  | 2 | 1 | 1 | 1 | 1 | 2 | 1 | 1 | 2 | 2 | 1 | 2 | 0 | 1 | 18 |
| Hemodynamic effects c   | PED | OR | 30946924 | LA | ME  | 2 | 1 | 1 | 1 | 1 | 2 | 1 | 1 | 2 | 2 | 1 | 0 | 0 | 1 | 16 |
| Impact of an Extraglot  | PED | OR | 31738725 | LA | MB  | 2 | 1 | 1 | 1 | 1 | 2 | 1 | 1 | 0 | 2 | 1 | 2 | 0 | 1 | 16 |
| Improved outcomes in    | PED | OR | 31623516 | LA | SRK | 2 | 1 | 1 | 1 | 1 | 2 | 1 | 1 | 0 | 2 | 0 | 2 | 0 | 1 | 15 |
| In-Hospital Cardiac Ar  | PED | OR | 31545574 | LA | MN  | 2 | 1 | 1 | 1 | 1 | 2 | 1 | 1 | 2 | 2 | 1 | 0 | 0 | 1 | 16 |

|                           |     |    |          |    |     |   |   |   |   |   |   |   |   |   |   |   |   |   |   |    |
|---------------------------|-----|----|----------|----|-----|---|---|---|---|---|---|---|---|---|---|---|---|---|---|----|
| Inadequate oxygen deli    | PED | OR | 31325555 | LA | SK  | 2 | 1 | 1 | 1 | 1 | 2 | 1 | 1 | 0 | 2 | 1 | 2 | 2 | 1 | 18 |
| Incidence of peri-opera   | PED | OR | 30048261 | LA | EG  | 2 | 0 | 1 | 1 | 1 | 2 | 1 | 1 | 2 | 0 | 1 | 0 | 0 | 1 | 13 |
| Influence of Cardiopul    | PED | OR | 30951004 | LA | ME  | 3 | 1 | 1 | 1 | 1 | 2 | 1 | 1 | 2 | 0 | 1 | 0 | 2 | 1 | 17 |
| Is Supplemental Oxyg      | PED | OR | 31824899 | LA | ME  | 3 | 1 | 1 | 1 | 1 | 0 | 1 | 1 | 2 | 2 | 1 | 0 | 0 | 1 | 15 |
| Knocking-fingers' ches    | PED | OR | 29384754 | LA | MT  | 2 | 1 | 1 | 1 | 1 | 2 | 1 | 1 | 2 | 2 | 1 | 2 | 0 | 1 | 18 |
| Location of arrest and    | PED | OR | 31075289 | LA | MN  | 2 | 1 | 1 | 1 | 1 | 2 | 1 | 1 | 0 | 2 | 1 | 0 | 0 | 1 | 14 |
| Machine learning base     | PED | OR | 30264218 | LA | MN  | 2 | 1 | 1 | 1 | 1 | 2 | 1 | 1 | 0 | 2 | 1 | 0 | 0 | 1 | 14 |
| Medic One Pediatric (t    | PED | OR | 31523730 | LA | MB  | 2 | 1 | 1 | 1 | 1 | 2 | 0 | 1 | 0 | 2 | 1 | 2 | 0 | 1 | 15 |
| Methods Used to Max       | PED | OR | 31464818 | LA | EG  | 2 | 1 | 1 | 1 | 1 | 2 | 1 | 1 | 2 | 0 | 1 | 2 | 2 | 1 | 18 |
| Multimodal assessmen      | PED | OR | 30735742 | LA | MN  | 2 | 1 | 1 | 0 | 1 | 2 | 1 | 1 | 0 | 2 | 1 | 2 | 2 | 1 | 17 |
| One-year cognitive and    | PED | OR | 30818016 | LA | LA  | 3 | 1 | 1 | 1 | 1 | 2 | 1 | 1 | 2 | 2 | 1 | 0 | 0 | 1 | 17 |
| One-year cognitive and    | PED | OR | 30818016 | LA | ME  | 2 | 1 | 1 | 1 | 1 | 2 | 1 | 1 | 0 | 2 | 1 | 0 | 2 | 1 | 16 |
| Outcomes After Extrac     | PED | OR | 30747771 | LA | MB  | 2 | 1 | 1 | 0 | 1 | 2 | 1 | 0 | 0 | 2 | 1 | 0 | 2 | 1 | 14 |
| Outcomes of in-hospit     | PED | OR | 30714507 | LA | SK  | 2 | 1 | 1 | 1 | 1 | 0 | 0 | 1 | 0 | 0 | 1 | 0 | 0 | 1 | 9  |
| Oxygenation and Hem       | PED | OR | 30987091 | LA | MN  | 3 | 0 | 1 | 1 | 1 | 2 | 1 | 1 | 0 | 2 | 1 | 0 | 0 | 1 | 14 |
| Pauses in compression     | PED | OR | 31421191 | LA | MN  | 2 | 1 | 1 | 1 | 1 | 2 | 1 | 1 | 0 | 2 | 1 | 2 | 0 | 1 | 16 |
| Pediatric cardiac arrest  | PED | OR | 31489021 | LA | EG  | 2 | 1 | 1 | 1 | 1 | 2 | 0 | 1 | 2 | 2 | 1 | 0 | 0 | 1 | 15 |
| Pediatric in-hospital C   | PED | OR | 31734222 | LA | ME  | 2 | 1 | 1 | 1 | 1 | 2 | 1 | 1 | 2 | 2 | 1 | 0 | 0 | 1 | 16 |
| Pediatric Out-of-Hospi    | PED | OR | 30572071 | LA | MT  | 4 | 1 | 1 | 1 | 1 | 2 | 1 | 1 | 2 | 2 | 1 | 2 | 2 | 1 | 22 |
| Pediatric Out-of-Hospi    | PED | OR | 31327568 | LA | LA  | 2 | 1 | 1 | 1 | 1 | 2 | 1 | 1 | 2 | 2 | 1 | 2 | 0 | 1 | 18 |
| Pediatric Out-of-Hospi    | PED | OR | 31327568 | LA | MN  | 2 | 1 | 1 | 1 | 1 | 2 | 1 | 1 | 0 | 2 | 1 | 0 | 0 | 1 | 14 |
| Pediatric Out-of-Hospi    | PED | OR | 31327568 | LA | MN  | 2 | 1 | 1 | 1 | 1 | 2 | 1 | 1 | 0 | 2 | 1 | 0 | 0 | 1 | 14 |
| Practice Patterns after t | PED | OR | 31093458 | LA | EG  | 1 | 1 | 1 | 1 | 1 | 2 | 0 | 1 | 0 | 0 | 1 | 0 | 0 | 1 | 10 |
| Prevalence and Outcon     | PED | OR | 31688674 | LA | SRK | 2 | 1 | 1 | 1 | 1 | 2 | 1 | 1 | 0 | 2 | 1 | 2 | 2 | 1 | 18 |
| Pulseless electrical acti | PED | OR | 29895572 | LA | EG  | 4 | 1 | 1 | 1 | 0 | 2 | 1 | 1 | 0 | 2 | 1 | 0 | 0 | 1 | 15 |
| Pulselessness After Ini   | PED | OR | 31006260 | LA | LA  | 2 | 1 | 1 | 1 | 1 | 2 | 1 | 1 | 2 | 2 | 1 | 0 | 0 | 1 | 16 |
| Pulselessness After Ini   | PED | OR | 31006260 | LA | MN  | 2 | 1 | 1 | 1 | 1 | 2 | 1 | 1 | 0 | 2 | 1 | 0 | 0 | 1 | 14 |
| Quantitative EEG pred     | PED | OR | 30971485 | LA | EG  | 2 | 1 | 1 | 1 | 1 | 2 | 1 | 1 | 2 | 2 | 1 | 0 | 2 | 1 | 18 |
| Race/Ethnicity and Ne     | PED | OR | 31288613 | LA | SK  | 2 | 1 | 1 | 1 | 1 | 2 | 1 | 1 | 2 | 2 | 1 | 0 | 0 | 1 | 16 |
| Readmissions to the IC    | PED | OR | 30867193 | LA | MB  | 2 | 1 | 1 | 1 | 1 | 2 | 1 | 0 | 0 | 2 | 1 | 0 | 2 | 1 | 15 |
| Relationship between i    | PED | OR | 30802557 | LA | MT  | 2 | 1 | 1 | 1 | 1 | 2 | 1 | 1 | 2 | 2 | 1 | 0 | 0 | 1 | 16 |
| Relationship Between      | PED | OR | 30985609 | LA | SK  | 2 | 1 | 1 | 1 | 1 | 2 | 1 | 1 | 2 | 2 | 1 | 2 | 2 | 1 | 20 |
| Relationships between     | PED | OR | 30922934 | LA | EG  | 2 | 1 | 1 | 1 | 1 | 2 | 1 | 1 | 2 | 2 | 1 | 0 | 0 | 1 | 16 |
| Rhythm characteristics    | PED | OR | 30639791 | LA | MB  | 2 | 1 | 1 | 1 | 1 | 2 | 0 | 1 | 0 | 2 | 1 | 0 | 0 | 1 | 13 |
| Sex Differences in Rec    | PED | OR | 30587069 | LA | LA  | 2 | 1 | 1 | 1 | 1 | 2 | 1 | 1 | 2 | 2 | 1 | 0 | 0 | 1 | 16 |
| Sex Differences in Rec    | PED | OR | 30587069 | LA | ME  | 2 | 1 | 1 | 1 | 1 | 2 | 1 | 1 | 0 | 2 | 1 | 0 | 0 | 1 | 14 |
| Simulation for Clinica    | PED | OR | 30608314 | LA | MT  | 2 | 1 | 1 | 1 | 1 | 2 | 0 | 0 | 2 | 2 | 1 | 2 | 2 | 1 | 18 |
| Smartwatch feedback d     | PED | OR | 29369843 | LA | MT  | 4 | 1 | 1 | 1 | 1 | 2 | 1 | 1 | 2 | 2 | 1 | 2 | 0 | 1 | 20 |
| Sports activity and pac   | PED | OR | 30953710 | LA | MN  | 2 | 1 | 1 | 1 | 1 | 2 | 1 | 1 | 0 | 2 | 1 | 0 | 0 | 1 | 14 |
| Sports activity and pac   | PED | OR | 30953710 | LA | SK  | 2 | 1 | 1 | 1 | 1 | 2 | 1 | 1 | 0 | 0 | 1 | 0 | 0 | 1 | 12 |
| Survival and Cardiopu     | PED | OR | 31453988 | LA | ME  | 2 | 1 | 1 | 1 | 1 | 2 | 1 | 1 | 2 | 2 | 1 | 2 | 2 | 1 | 20 |
| The aquaporin-4 inhibi    | PED | OR | 30367162 | LA | LA  | 3 | 1 | 1 | 1 | 1 | 2 | 1 | 1 | 0 | 2 | 1 | 0 | 0 | 1 | 15 |
| The aquaporin-4 inhibi    | PED | OR | 30367162 | LA | SRK | 1 | 1 | 1 | 1 | 1 | 2 | 1 | 1 | 0 | 2 | 1 | 0 | 0 | 1 | 13 |
| The association of earl   | PED | OR | 31175965 | LA | ME  | 2 | 1 | 1 | 1 | 1 | 2 | 1 | 1 | 2 | 2 | 1 | 0 | 2 | 1 | 18 |
| The Association of Ho     | PED | OR | 30672841 | LA | EG  | 2 | 1 | 1 | 1 | 1 | 2 | 1 | 1 | 2 | 2 | 1 | 0 | 2 | 1 | 18 |
| The association of inm    | PED | OR | 31176666 | LA | EG  | 2 | 1 | 1 | 1 | 1 | 2 | 1 | 1 | 2 | 2 | 1 | 0 | 2 | 1 | 18 |
| The impact of a fellow    | PED | OR | 31331310 | LA | MT  | 1 | 1 | 1 | 1 | 1 | 0 | 0 | 1 | 2 | 2 | 1 | 2 | 0 | 1 | 14 |
| The Prognostic Value      | PED | OR | 31688714 | LA | EG  | 2 | 1 | 1 | 1 | 1 | 2 | 1 | 0 | 2 | 2 | 1 | 0 | 0 | 1 | 15 |
| The prognostic value c    | PED | OR | 30576784 | LA | ME  | 2 | 1 | 1 | 1 | 1 | 2 | 1 | 1 | 0 | 2 | 1 | 2 | 2 | 1 | 18 |
| The prognostic value c    | PED | OR | 30576784 | LA | LA  | 2 | 1 | 1 | 1 | 1 | 2 | 0 | 1 | 2 | 2 | 1 | 2 | 0 | 1 | 17 |
| The Prognostic Value      | PED | OR | 31702709 | LA | EG  | 2 | 1 | 1 | 1 | 1 | 2 | 0 | 1 | 2 | 2 | 1 | 2 | 2 | 1 | 19 |
| Time to epinephrine tr    | PED | OR | 30917838 | LA | MT  | 2 | 1 | 1 | 1 | 1 | 2 | 0 | 1 | 2 | 2 | 1 | 2 | 2 | 1 | 19 |
| Trends in Survival Aft    | PED | OR | 31542952 | LA | MT  | 2 | 1 | 1 | 1 | 1 | 2 | 1 | 1 | 2 | 2 | 1 | 2 | 2 | 1 | 20 |

|                          |     |    |          |    |       |   |   |   |   |   |   |   |   |   |   |   |   |   |   |    |
|--------------------------|-----|----|----------|----|-------|---|---|---|---|---|---|---|---|---|---|---|---|---|---|----|
| Trends in Survival Aft   | PED | OR | 31542952 | LA | LA    | 2 | 1 | 1 | 1 | 1 | 2 | 1 | 1 | 2 | 2 | 1 | 0 | 0 | 1 | 16 |
| Two-thumb-encircling     | PED | OR | 30007942 | LA | MN    | 3 | 1 | 1 | 1 | 1 | 2 | 1 | 1 | 0 | 0 | 1 | 0 | 0 | 0 | 12 |
| Use of Sodium Bicarb     | PED | OR | 31888123 | LA | LA    | 2 | 1 | 1 | 1 | 1 | 2 | 1 | 1 | 2 | 2 | 1 | 2 | 2 | 1 | 20 |
| Use of Sodium Bicarb     | PED | OR | 31888123 | LA | MB    | 2 | 1 | 1 | 1 | 1 | 0 | 1 | 1 | 0 | 2 | 1 | 2 | 2 | 1 | 16 |
| Vancomycin Prescribir    | PED | OR | 30864056 | LA | SK    | 2 | 1 | 1 | 1 | 1 | 2 | 1 | 1 | 2 | 2 | 1 | 2 | 0 | 1 | 18 |
| Ventilation Rates and    | PED | OR | 31369424 | LA | SRK   | 2 | 1 | 1 | 1 | 1 | 2 | 1 | 1 | 2 | 2 | 1 | 2 | 2 | 1 | 20 |
| Ventilation Rates and    | PED | OR | 31369424 | LA | LA    | 2 | 1 | 1 | 1 | 1 | 2 | 1 | 1 | 2 | 2 | 1 | 2 | 2 | 1 | 20 |
| Videographic Assessm     | PED | OR | 30118642 | LA | EG    | 2 | 1 | 1 | 1 | 1 | 2 | 0 | 1 | 2 | 2 | 0 | 0 | 2 | 1 | 16 |
| Wearable cardioverter-c  | PED | OR | 31476408 | LA | ME    | 2 | 1 | 1 | 1 | 0 | 0 | 1 | 0 | 0 | 2 | 1 | 2 | 2 | 1 | 14 |
| Wearable cardioverter-c  | PED | OR | 31476408 | LA | LA    | 3 | 1 | 1 | 1 | 1 | 0 | 0 | 0 | 0 | 2 | 1 | 0 | 0 | 1 | 11 |
| What is the best positi  | PED | OR | 30389590 | LA | MT    | 2 | 1 | 1 | 1 | 1 | 2 | 1 | 1 | 2 | 2 | 1 | 2 | 2 | 1 | 20 |
| What is the best positi  | PED | OR | 30389590 | LA | LA    | 2 | 1 | 1 | 1 | 1 | 2 | 1 | 1 | 2 | 2 | 1 | 0 | 2 | 1 | 18 |
| Association of Duratio   | PED | OR | 31568263 | LA | MB    | 2 | 1 | 1 | 1 | 1 | 2 | 1 | 1 | 0 | 2 | 1 | 0 | 0 | 1 | 14 |
| Efficacy and safety of i | PED | OR | 30255451 | LA | MB    | 2 | 1 | 1 | 1 | 1 | 2 | 1 | 1 | 0 | 2 | 1 | 0 | 0 | 1 | 14 |
| Prehospital advanced a   | PED | OR | 31539609 | LA | MB    | 2 | 1 | 1 | 1 | 1 | 2 | 1 | 1 | 0 | 2 | 1 | 0 | 0 | 1 | 14 |
| AMethod toDetect Pre     | PRE | OR | 31144648 | DC | KY    | 3 | 1 | 1 | 1 | 1 | 2 | 1 | 1 | 2 | 2 | 1 | 2 | 2 | 1 | 21 |
| A centralized system fi  | PRE | OR | 31323187 | DC | DR    | 2 | 1 | 1 | 1 | 1 | 2 | 1 | 1 | 2 | 2 | 1 | 2 | 2 | 1 | 20 |
| A History and Overvie    | PRE | OR | 31042339 | DC | DR    | 2 | 1 | 1 | 1 | 1 | 0 | 1 | 1 | 2 | 2 | 1 | 2 | 2 | 1 | 18 |
| A Machine Learning S     | PRE | OR | 30387719 | DC | KY    | 2 | 1 | 1 | 1 | 1 | 0 | 0 | 0 | 2 | 2 | 1 | 0 | 0 | 1 | 12 |
| A multistage algorithn   | PRE | OR | 29993407 | DC | TD    | 3 | 1 | 1 | 1 | 1 | 0 | 1 | 0 | 2 | 2 | 1 | 0 | 0 | 1 | 14 |
| A National Survey on     | PRE | OR | 30395025 | DC | DR    | 2 | 1 | 1 | 1 | 1 | 2 | 1 | 1 | 0 | 2 | 1 | 2 | 2 | 1 | 18 |
| A robust machine lear    | PRE | OR | 31946270 | DC | TD    | 3 | 1 | 1 | 1 | 0 | 0 | 1 | 0 | 2 | 2 | 1 | 0 | 0 | 1 | 13 |
| A Robust Machine Le      | PRE | OR | 31946270 | KH | TD/KH | 1 | 1 | 1 | 1 | 1 | 0 | 1 | 0 | 2 | 2 | 1 | 0 | 0 | 1 | 12 |
| A simple decision rule   | PRE | OR | 31228547 | DC | CU    | 2 | 1 | 1 | 1 | 1 | 0 | 0 | 1 | 2 | 2 | 1 | 2 | 2 | 1 | 17 |
| A simple decision rule   | PRE | OR | 31228547 | DC | DC    | 2 | 1 | 1 | 1 | 1 | 2 | 1 | 1 | 2 | 2 | 1 | 2 | 2 | 1 | 20 |
| Accuracy of nature of c  | PRE | OR | 30728188 | DC | TD    | 2 | 1 | 1 | 1 | 1 | 0 | 1 | 1 | 0 | 2 | 1 | 0 | 0 | 1 | 12 |
| Accuracy of ultrasound   | PRE | OR | 30890289 | DC | CU    | 4 | 1 | 1 | 1 | 1 | 2 | 1 | 1 | 2 | 0 | 0 | 2 | 2 | 1 | 19 |
| Activation of extracorp  | PRE | OR | 31618345 | DC | KY    | 2 | 1 | 1 | 1 | 1 | 2 | 1 | 1 | 2 | 2 | 1 | 2 | 2 | 1 | 20 |
| Advanced airway man      | PRE | OR | 31756361 | DC | TD    | 2 | 1 | 1 | 1 | 1 | 2 | 1 | 1 | 2 | 2 | 1 | 2 | 0 | 0 | 17 |
| Ambulance Density an     | PRE | OR | 30586753 | DC | DR    | 2 | 1 | 1 | 1 | 1 | 2 | 1 | 1 | 2 | 2 | 1 | 2 | 2 | 1 | 20 |
| An Analysis Using M      | PRE | OR | 31198281 | DC | RC    | 2 | 1 | 1 | 1 | 1 | 2 | 1 | 1 | 2 | 2 | 1 | 2 | 2 | 1 | 20 |
| An observational study   | PRE | OR | 31266839 | DC | KY    | 2 | 1 | 1 | 1 | 1 | 2 | 0 | 1 | 2 | 2 | 1 | 2 | 2 | 1 | 19 |
| Analyzing the Effectiv   | PRE | OR | 30709607 | DC | DR    | 3 | 1 | 1 | 1 | 1 | 0 | 1 | 0 | 2 | 2 | 1 | 2 | 2 | 1 | 18 |
| Application of a dual-c  | PRE | OR | 31456379 | DC | CU    | 2 | 1 | 1 | 1 | 1 | 2 | 1 | 0 | 2 | 2 | 1 | 2 | 2 | 1 | 19 |
| Application of mechan    | PRE | OR | 30601816 | DC | RC    | 2 | 1 | 1 | 1 | 1 | 2 | 1 | 1 | 2 | 2 | 1 | 2 | 2 | 1 | 20 |
| Assessment of Rapid I    | PRE | OR | 31355875 | DC | DR    | 2 | 1 | 1 | 1 | 1 | 2 | 1 | 1 | 2 | 2 | 1 | 2 | 2 | 1 | 20 |
| Associationofbystande    | PRE | OR | 31202824 | DC | KY    | 2 | 1 | 1 | 1 | 1 | 2 | 1 | 1 | 2 | 2 | 1 | 2 | 2 | 1 | 20 |
| Association between ar   | PRE | OR | 30795948 | DC | TD    | 2 | 1 | 1 | 1 | 1 | 2 | 0 | 1 | 2 | 2 | 1 | 0 | 0 | 0 | 14 |
| Association between le   | PRE | OR | 30825552 | DC | CU    | 2 | 1 | 1 | 1 | 1 | 0 | 0 | 1 | 0 | 2 | 1 | 2 | 0 | 1 | 13 |
| Association Between M    | PRE | OR | 31484867 | DC | KY    | 2 | 1 | 1 | 1 | 1 | 2 | 1 | 1 | 2 | 2 | 1 | 2 | 2 | 1 | 20 |
| Association between p    | PRE | OR | 31304028 | DC | TD    | 2 | 1 | 1 | 1 | 1 | 2 | 1 | 1 | 2 | 2 | 1 | 2 | 0 | 1 | 18 |
| Association between p    | PRE | OR | 31645507 | DC | TD    | 2 | 1 | 1 | 1 | 1 | 2 | 1 | 0 | 2 | 2 | 1 | 2 | 2 | 1 | 19 |
| Association between sl   | PRE | OR | 31377392 | DC | DR    | 2 | 1 | 1 | 1 | 1 | 2 | 1 | 1 | 2 | 2 | 1 | 2 | 2 | 1 | 20 |
| Association of chest c   | PRE | OR | 31369793 | DC | TD    | 2 | 1 | 1 | 1 | 1 | 2 | 1 | 1 | 2 | 2 | 1 | 2 | 0 | 1 | 18 |
| Association of Prehos    | PRE | OR | 31289342 | DC | DR    | 2 | 1 | 1 | 1 | 1 | 2 | 1 | 1 | 2 | 2 | 1 | 2 | 2 | 1 | 20 |
| Association of the tim   | PRE | OR | 29804789 | DC | RC    | 2 | 1 | 1 | 1 | 1 | 2 | 1 | 1 | 2 | 2 | 1 | 2 | 2 | 1 | 20 |
| Association of ventilat  | PRE | OR | 31112744 | DC | KY    | 2 | 1 | 1 | 1 | 1 | 2 | 0 | 1 | 2 | 2 | 1 | 2 | 2 | 1 | 19 |
| Automated external de    | PRE | OR | 30682401 | DC | DR    | 2 | 1 | 1 | 1 | 1 | 2 | 1 | 1 | 2 | 2 | 1 | 2 | 2 | 1 | 20 |
| Availability and Use o   | PRE | OR | 30572769 | DC | TD    | 1 | 1 | 1 | 1 | 1 | 2 | 1 | 0 | 0 | 2 | 1 | 0 | 0 | 0 | 11 |
| Avalanche victims in c   | PRE | OR | 31185258 | DC | CU    | 2 | 1 | 1 | 1 | 1 | 0 | 0 | 1 | 0 | 2 | 1 | 2 | 2 | 1 | 15 |
| Bayesian Analysis of t   | PRE | OR | 31272823 | DC | RC    | 2 | 1 | 1 | 1 | 1 | 2 | 1 | 1 | 2 | 2 | 1 | 2 | 2 | 1 | 20 |
| Benefits of adding a pl  | PRE | OR | 31772105 | DC | KY    | 2 | 1 | 1 | 1 | 1 | 2 | 1 | 1 | 2 | 2 | 1 | 2 | 2 | 1 | 20 |
| Bystander cardiopulmc    | PRE | OR | 31129226 | DC | RC    | 2 | 1 | 1 | 1 | 1 | 2 | 1 | 1 | 2 | 2 | 1 | 2 | 2 | 1 | 20 |



|                          |     |    |          |    |    |   |   |   |   |   |   |   |   |   |   |   |   |   |   |    |
|--------------------------|-----|----|----------|----|----|---|---|---|---|---|---|---|---|---|---|---|---|---|---|----|
| C-MAC Video Laryng       | PRE | OR | 31146497 | DC | KY | 2 | 1 | 1 | 1 | 1 | 2 | 1 | 1 | 2 | 2 | 1 | 2 | 2 | 1 | 20 |
| Can pulse check by th    | PRE | OR | 30782884 | DC | CU | 2 | 1 | 1 | 1 | 1 | 2 | 1 | 1 | 2 | 2 | 1 | 2 | 0 | 1 | 18 |
| Capnography: A supp      | PRE | OR | 31005583 | DC | TD | 2 | 1 | 1 | 1 | 1 | 0 | 0 | 1 | 2 | 2 | 1 | 2 | 0 | 1 | 15 |
| Cardiac arrest prior to  | PRE | OR | 31094743 | DC | CU | 2 | 1 | 1 | 1 | 0 | 2 | 0 | 0 | 2 | 2 | 1 | 2 | 2 | 1 | 17 |
| Cardiopulmonary resu     | PRE | OR | 31483118 | DC | DR | 2 | 1 | 1 | 1 | 1 | 2 | 1 | 1 | 2 | 2 | 1 | 2 | 2 | 1 | 20 |
| Characterising variatio  | PRE | OR | 30852537 | DC | RC | 1 | 1 | 1 | 1 | 1 | 2 | 1 | 1 | 2 | 2 | 1 | 0 | 0 | 1 | 15 |
| Characteristics Associ   | PRE | OR | 30968817 | DC | RC | 1 | 1 | 1 | 1 | 1 | 2 | 1 | 1 | 2 | 2 | 1 | 2 | 2 | 1 | 19 |
| Characteristics of aÅ n  | PRE | OR | 30560444 | DC | DR | 2 | 1 | 1 | 1 | 1 | 2 | 1 | 1 | 2 | 2 | 1 | 2 | 2 | 1 | 20 |
| Chest compression rel    | PRE | OR | 31560989 | DC | KY | 2 | 1 | 1 | 1 | 1 | 2 | 1 | 1 | 2 | 2 | 1 | 2 | 2 | 1 | 20 |
| Circumstances, outcon    | PRE | OR | 31351088 | DC | CU | 2 | 1 | 1 | 1 | 1 | 2 | 1 | 1 | 0 | 2 | 1 | 2 | 2 | 1 | 18 |
| Circumstances, outcon    | PRE | OR | 31351088 | DC | CU | 2 | 1 | 1 | 1 | 1 | 2 | 0 | 1 | 0 | 0 | 1 | 0 | 0 | 1 | 11 |
| Citizen bystander-patic  | PRE | OR | 31350237 | DC | RC | 2 | 1 | 1 | 1 | 1 | 2 | 1 | 1 | 2 | 2 | 1 | 2 | 2 | 1 | 20 |
| Closed chest compress    | PRE | OR | 31077754 | DC | DR | 4 | 1 | 1 | 1 | 1 | 2 | 1 | 1 | 2 | 2 | 1 | 2 | 2 | 1 | 22 |
| Closed chest compress    | PRE | OR | 31077754 | DC | DC | 4 | 1 | 1 | 1 | 1 | 2 | 1 | 1 | 0 | 2 | 1 | 2 | 0 | 1 | 18 |
| Cluster randomised co    | PRE | OR | 30683057 | DC | RC | 3 | 1 | 1 | 1 | 1 | 2 | 1 | 1 | 2 | 2 | 1 | 2 | 0 | 1 | 19 |
| Coles and woolworths     | PRE | OR | 31820576 | DC | CU | 2 | 1 | 0 | 0 | 0 | 0 | 0 | 1 | 0 | 1 | 1 | 2 | 2 | 1 | 11 |
| Combination of cardia    | PRE | OR | 31792731 | DC | TD | 3 | 1 | 1 | 1 | 1 | 0 | 1 | 1 | 0 | 2 | 1 | 0 | 0 | 1 | 13 |
| Community first resp     | PRE | OR | 31323120 | DC | DR | 4 | 1 | 1 | 1 | 1 | 2 | 1 | 0 | 2 | 2 | 1 | 2 | 2 | 1 | 21 |
| Comparing bysterande     | PRE | OR | 31005588 | DC | CU | 4 | 1 | 1 | 1 | 1 | 2 | 0 | 1 | 0 | 2 | 1 | 0 | 0 | 1 | 15 |
| Comparison of chest c    | PRE | OR | 31112576 | DC | DR | 4 | 1 | 1 | 1 | 1 | 2 | 1 | 1 | 2 | 2 | 1 | 2 | 2 | 1 | 22 |
| Comparison of chest c    | PRE | OR | 31112576 | DC | RC | 2 | 1 | 1 | 1 | 1 | 2 | 1 | 0 | 2 | 2 | 1 | 2 | 2 | 1 | 19 |
| Comparison of EMS p      | PRE | OR | 31042340 | DC | TD | 3 | 1 | 1 | 1 | 1 | 2 | 1 | 1 | 0 | 2 | 1 | 0 | 0 | 1 | 15 |
| Comparison of extraco    | PRE | OR | 30691512 | DC | TM | 2 | 1 | 1 | 1 | 1 | 2 | 1 | 1 | 2 | 2 | 1 | 2 | 0 | 1 | 18 |
| Comparison of extraco    | PRE | OR | 30691512 | DC | RC | 2 | 1 | 1 | 1 | 1 | 2 | 1 | 1 | 0 | 2 | 1 | 2 | 2 | 1 | 18 |
| Comparison of Outcor     | PRE | OR | 30795712 | DC | DR | 2 | 1 | 1 | 1 | 1 | 2 | 1 | 0 | 2 | 2 | 1 | 2 | 2 | 1 | 19 |
| Comparison of standar    | PRE | OR | 31771511 | DC | RC | 3 | 1 | 1 | 1 | 1 | 2 | 1 | 1 | 2 | 2 | 1 | 2 | 2 | 1 | 21 |
| Comparison of the effi   | PRE | OR | 31843537 | DC | ky | 2 | 1 | 1 | 1 | 1 | 2 | 1 | 1 | 2 | 2 | 1 | 2 | 0 | 1 | 18 |
| Comparison of two di     | PRE | OR | 30760297 | DC | TD | 2 | 1 | 1 | 1 | 1 | 2 | 1 | 1 | 2 | 2 | 1 | 2 | 0 | 0 | 17 |
| Comparison of two di     | PRE | OR | 30760297 | DC | DC | 2 | 1 | 1 | 1 | 1 | 0 | 1 | 1 | 2 | 2 | 1 | 2 | 2 | 1 | 18 |
| Comparison of video l    | PRE | OR | 30385385 | DC | TD | 2 | 1 | 1 | 1 | 1 | 2 | 1 | 1 | 2 | 2 | 1 | 2 | 2 | 1 | 20 |
| Confirmed cardiac outj   | PRE | OR | 31171627 | DC | RC | 2 | 1 | 1 | 1 | 1 | 2 | 1 | 1 | 2 | 2 | 1 | 2 | 2 | 1 | 20 |
| Confirmed cardiac outj   | PRE | OR | 31171627 | DC | DR | 2 | 1 | 1 | 1 | 1 | 2 | 1 | 1 | 2 | 2 | 1 | 2 | 2 | 1 | 20 |
| Convolutional Recurre    | PRE | OR | 31946274 | DC | RC | 2 | 1 | 1 | 1 | 1 | 2 | 1 | 0 | 2 | 2 | 1 | 2 | 2 | 1 | 19 |
| Correlation between en   | PRE | OR | 31665061 | DC | CU | 2 | 1 | 1 | 1 | 1 | 2 | 1 | 1 | 2 | 2 | 1 | 2 | 2 | 1 | 20 |
| Decreasing time to fir   | PRE | OR | 31469063 | DC | TD | 2 | 1 | 1 | 1 | 1 | 2 | 1 | 1 | 2 | 2 | 1 | 2 | 2 | 1 | 20 |
| Defibrillator charging l | PRE | OR | 31332449 | DC | KY | 3 | 1 | 1 | 1 | 1 | 2 | 1 | 1 | 2 | 2 | 1 | 2 | 2 | 1 | 21 |
| Derivation and internal  | PRE | OR | 31311608 | DC | CU | 2 | 1 | 1 | 1 | 0 | 2 | 1 | 1 | 2 | 0 | 0 | 0 | 0 | 1 | 12 |
| Determination of the tl  | PRE | OR | 31910501 | DC | KY | 2 | 1 | 1 | 1 | 1 | 2 | 1 | 1 | 2 | 2 | 1 | 2 | 0 | 1 | 18 |
| Developing neural netv   | PRE | OR | 30982559 | DC | DR | 2 | 1 | 1 | 1 | 1 | 2 | 1 | 1 | 2 | 2 | 1 | 2 | 2 | 1 | 20 |
| Developing new ways      | PRE | OR | 31034193 | DC | CU | 3 | 1 | 1 | 1 | 1 | 2 | 1 | 1 | 2 | 2 | 1 | 2 | 2 | 1 | 21 |
| Direct transport to PC   | PRE | OR | 31271727 | DC | DR | 2 | 1 | 1 | 1 | 1 | 2 | 1 | 1 | 2 | 2 | 1 | 2 | 2 | 1 | 20 |
| Disparity in Receipt ar  | PRE | OR | 31613657 | DC | CU | 2 | 1 | 1 | 1 | 1 | 0 | 0 | 1 | 2 | 2 | 1 | 2 | 2 | 1 | 17 |
| Dispatcher assisted car  | PRE | OR | 31689831 | DC | TD | 3 | 1 | 1 | 1 | 1 | 2 | 0 | 1 | 2 | 2 | 1 | 2 | 0 | 0 | 17 |
| Dispatcher Identificat   | PRE | OR | 31779716 | DC | DR | 2 | 1 | 1 | 1 | 1 | 2 | 1 | 1 | 2 | 2 | 1 | 2 | 2 | 1 | 20 |
| Dispatcher-Assisted B    | PRE | OR | 31392232 | DC | KY | 2 | 1 | 1 | 1 | 1 | 2 | 0 | 1 | 2 | 2 | 1 | 2 | 0 | 1 | 17 |
| Dispatcher-assisted car  | PRE | OR | 31675978 | DC | RC | 2 | 1 | 1 | 1 | 1 | 2 | 1 | 1 | 0 | 0 | 1 | 2 | 0 | 1 | 14 |
| Dispatcher-assisted car  | PRE | OR | 31756360 | DC | KY | 2 | 1 | 1 | 1 | 1 | 2 | 1 | 1 | 2 | 2 | 1 | 0 | 0 | 1 | 16 |
| Does chest compressio    | PRE | OR | 30761856 | DC | KY | 2 | 1 | 1 | 1 | 1 | 2 | 1 | 1 | 2 | 2 | 1 | 2 | 2 | 1 | 20 |
| Does endotracheal intu   | PRE | OR | 30753851 | DC | TD | 2 | 1 | 1 | 1 | 1 | 2 | 1 | 0 | 2 | 2 | 1 | 2 | 0 | 0 | 16 |
| Does endotracheal intu   | PRE | OR | 30753851 | DC | CU | 2 | 1 | 1 | 1 | 1 | 2 | 1 | 0 | 2 | 2 | 1 | 2 | 0 | 1 | 17 |
| Drone delivery of an a   | PRE | OR | 30961651 | DC | CU | 2 | 1 | 1 | 1 | 1 | 2 | 1 | 1 | 2 | 2 | 1 | 0 | 0 | 1 | 16 |
| Early advanced life sup  | PRE | OR | 30576783 | DC | KY | 2 | 1 | 1 | 1 | 1 | 2 | 1 | 1 | 2 | 2 | 1 | 2 | 2 | 1 | 20 |
| Early initiation of Ext  | PRE | OR | 30738245 | DC | TM | 4 | 1 | 0 | 0 | 0 | 2 | 1 | 0 | 2 | 2 | 1 | 0 | 0 | 0 | 13 |

|                          |     |    |          |    |    |   |   |   |   |   |   |   |   |   |   |   |   |   |   |    |
|--------------------------|-----|----|----------|----|----|---|---|---|---|---|---|---|---|---|---|---|---|---|---|----|
| Early initiation of extr | PRE | OR | 30738245 | DC | RC | 3 | 1 | 1 | 1 | 0 | 2 | 1 | 1 | 0 | 0 | 0 | 0 | 0 | 1 | 11 |
| ECG pre-hospital telet   | PRE | OR | 31441838 | DC | CU | 2 | 1 | 1 | 1 | 1 | 2 | 0 | 0 | 0 | 0 | 0 | 0 | 0 | 1 | 9  |
| ECG-based pulse detec    | PRE | OR | 30215212 | DC | TD | 3 | 1 | 1 | 1 | 0 | 2 | 0 | 0 | 2 | 2 | 1 | 0 | 0 | 1 | 14 |
| Effectofendotrachealint  | PRE | OR | 31009692 | DC | KY | 2 | 1 | 1 | 1 | 1 | 2 | 0 | 1 | 2 | 2 | 1 | 2 | 2 | 1 | 19 |
| Effect of a feedback sy  | PRE | OR | 31884870 | DC | TD | 3 | 1 | 1 | 1 | 1 | 2 | 1 | 1 | 2 | 2 | 1 | 2 | 2 | 1 | 21 |
| Effect of awareness tir  | PRE | OR | 31870923 | DC | DR | 2 | 1 | 1 | 1 | 1 | 2 | 1 | 1 | 2 | 2 | 1 | 2 | 2 | 1 | 20 |
| Effect of bystander CP   | PRE | OR | 31499101 | DC | RC | 2 | 1 | 1 | 1 | 1 | 2 | 1 | 1 | 2 | 2 | 1 | 2 | 2 | 1 | 20 |
| Effect of endotracheal : | PRE | OR | 31009692 | DC | CU | 3 | 1 | 1 | 1 | 1 | 2 | 1 | 1 | 0 | 2 | 1 | 2 | 2 | 1 | 19 |
| Effect of Implementati   | PRE | OR | 31291129 | DC | DR | 1 | 1 | 1 | 1 | 1 | 2 | 1 | 1 | 2 | 2 | 1 | 2 | 2 | 1 | 19 |
| Effect of initial airway | PRE | OR | 30902690 | DC | DR | 2 | 1 | 1 | 1 | 1 | 2 | 1 | 1 | 2 | 2 | 1 | 2 | 2 | 1 | 20 |
| Effect of Intravenous \  | PRE | OR | 31122576 | DC | KY | 2 | 1 | 1 | 1 | 1 | 2 | 1 | 0 | 2 | 2 | 1 | 2 | 2 | 1 | 19 |
| Effect of Intravenous \  | PRE | OR | 31122576 | DC | DR | 2 | 1 | 1 | 1 | 1 | 2 | 1 | 1 | 2 | 2 | 1 | 2 | 2 | 1 | 20 |
| Effect of new 9-1-1 sv:  | PRE | OR | 31664875 | DC | DR | 2 | 1 | 1 | 1 | 1 | 2 | 1 | 1 | 2 | 2 | 1 | 2 | 2 | 1 | 20 |
| Effect of team-based c   | PRE | OR | 31550494 | DC | TD | 2 | 1 | 1 | 1 | 1 | 2 | 1 | 1 | 0 | 2 | 1 | 2 | 0 | 1 | 16 |
| Effectiveness and safet  | Pre | OR | 30648550 | DC | CU | 2 | 1 | 1 | 1 | 1 | 2 | 1 | 1 | 2 | 0 | 1 | 2 | 0 | 1 | 16 |
| Effectiveness of a com   | PRE | OR | 31669756 | DC | DR | 1 | 1 | 1 | 1 | 1 | 2 | 1 | 1 | 2 | 2 | 1 | 2 | 2 | 1 | 19 |
| Effectiveness of a netw  | PRE | OR | 31088520 | DC | KY | 2 | 1 | 1 | 1 | 1 | 2 | 0 | 1 | 2 | 0 | 1 | 2 | 0 | 1 | 15 |
| Effectiveness of dispat  | PRE | OR | 31542238 | DC | RC | 2 | 1 | 1 | 1 | 1 | 2 | 1 | 1 | 0 | 2 | 1 | 0 | 0 | 1 | 14 |
| Effectiveness of intuba  | PRE | OR | 30572066 | DC | CU | 2 | 1 | 1 | 1 | 1 | 2 | 1 | 1 | 2 | 2 | 1 | 2 | 2 | 1 | 20 |
| Effectiveness of Preho:  | PRE | OR | 30773983 | DC | TD | 2 | 1 | 1 | 1 | 1 | 2 | 1 | 1 | 2 | 2 | 1 | 2 | 2 | 1 | 20 |
| Effectiveness of the du  | PRE | OR | 31348172 | DC | CU | 2 | 1 | 1 | 1 | 1 | 2 | 0 | 0 | 2 | 2 | 1 | 2 | 2 | 1 | 18 |
| Effects of Chest Comp    | PRE | OR | 31938777 | DC | KY | 2 | 1 | 1 | 1 | 0 | 2 | 0 | 1 | 2 | 2 | 1 | 2 | 2 | 1 | 18 |
| Effects of dispatcher-in | PRE | OR | 31499100 | DC | TD | 2 | 1 | 1 | 1 | 1 | 0 | 1 | 1 | 2 | 2 | 1 | 2 | 0 | 0 | 15 |
| Effects of Shenfu injec  | PRE | OR | 31770574 | DC | DR | 4 | 1 | 1 | 1 | 1 | 2 | 1 | 1 | 2 | 2 | 1 | 2 | 0 | 1 | 20 |
| Epinephrine administr    | PRE | OR | 29857945 | DC | RC | 2 | 1 | 1 | 1 | 1 | 2 | 1 | 1 | 2 | 2 | 1 | 2 | 0 | 1 | 18 |
| Epinephrine during res   | PRE | OR | 31420058 | DC | TD | 2 | 1 | 1 | 1 | 1 | 2 | 1 | 1 | 2 | 2 | 1 | 2 | 0 | 1 | 18 |
| Ethical dilemmas durin   | PRE | OR | 28558489 | DC | CU | 1 | 1 | 1 | 1 | 1 | 2 | 1 | 1 | 0 | 0 | 0 | 0 | 0 | 1 | 10 |
| Experiences among fir    | PRE | OR | 31753873 | DC | KY | 1 | 1 | 1 | 1 | 1 | 2 | 1 | 1 | 2 | 2 | 1 | 2 | 2 | 1 | 19 |
| Extracorporeal cardiop   | PRE | OR | 31860604 | DC | CU | 2 | 1 | 1 | 1 | 1 | 2 | 1 | 1 | 2 | 2 | 1 | 2 | 2 | 1 | 20 |
| Extracorporeal cardiop   | PRE | OR | 31670793 | DC | TD | 2 | 1 | 1 | 1 | 1 | 2 | 1 | 1 | 2 | 2 | 1 | 0 | 0 | 0 | 15 |
| Extracorporeal Life Su   | PRE | OR | 30365965 | DC | DR | 2 | 1 | 1 | 1 | 1 | 2 | 1 | 1 | 2 | 2 | 1 | 2 | 2 | 1 | 20 |
| Factors Associated wit   | PRE | OR | 30585772 | DC | RC | 1 | 1 | 1 | 1 | 1 | 2 | 1 | 1 | 0 | 2 | 1 | 0 | 0 | 1 | 13 |
| FEASIBILITY OF A l       | PRE | OR | 31060845 | DC | KY | 2 | 1 | 1 | 1 | 1 | 2 | 1 | 1 | 2 | 2 | 1 | 2 | 2 | 1 | 20 |
| Feasibility of a modifi  | PRE | OR | 31060845 | DC | TD | 3 | 1 | 1 | 1 | 1 | 2 | 1 | 0 | 0 | 2 | 1 | 2 | 2 | 1 | 18 |
| Feasibility of a Modifi  | PRE | OR | 31060845 | DC | DC | 2 | 1 | 1 | 1 | 1 | 2 | 1 | 0 | 2 | 2 | 1 | 0 | 0 | 1 | 15 |
| Feasibility of an augm   | PRE | OR | 31406943 | DC | DR | 1 | 1 | 1 | 1 | 1 | 2 | 1 | 1 | 2 | 2 | 1 | 2 | 2 | 1 | 19 |
| Feasibility of Out-of-H  | PRE | OR | 30192687 | DC | KY | 2 | 1 | 1 | 1 | 1 | 2 | 1 | 1 | 2 | 2 | 1 | 2 | 2 | 1 | 20 |
| Feasibility of Pre-Hosp  | PRE | OR | 31707942 | DC | TD | 2 | 1 | 1 | 1 | 1 | 2 | 1 | 1 | 2 | 2 | 1 | 0 | 0 | 1 | 16 |
| Feasibility study for ir | PRE | OR | 31867879 | DC | DR | 2 | 1 | 1 | 1 | 1 | 2 | 1 | 1 | 0 | 2 | 1 | 2 | 2 | 1 | 18 |
| Feasibility and clinic   | PRE | OR | 31851119 | DC | CU | 2 | 1 | 1 | 1 | 1 | 2 | 1 | 1 | 2 | 2 | 1 | 2 | 2 | 1 | 20 |
| Field termination-of-re  | PRE | OR | 30580892 | DC | DR | 2 | 1 | 1 | 1 | 1 | 2 | 1 | 1 | 2 | 2 | 1 | 2 | 2 | 1 | 20 |
| First response treatmer  | PRE | OR | 31842928 | DC | CU | 1 | 1 | 1 | 1 | 1 | 2 | 1 | 1 | 0 | 2 | 1 | 0 | 0 | 1 | 13 |
| Focused cardiac ultraso  | PRE | OR | 31279947 | DC | KY | 2 | 1 | 1 | 1 | 1 | 2 | 0 | 1 | 2 | 2 | 1 | 2 | 2 | 1 | 19 |
| GPs who volunteer to     | PRE | OR | 31686571 | DC | TD | 1 | 1 | 0 | 0 | 0 | 2 | 1 | 1 | 0 | 0 | 1 | 0 | 0 | 0 | 7  |
| Health care utilization  | PRE | OR | 31039392 | DC | RC | 2 | 1 | 1 | 1 | 1 | 2 | 1 | 1 | 2 | 2 | 1 | 0 | 0 | 1 | 16 |
| Healthcare Provider Pe   | PRE | OR | 31232856 | DC | TD | 2 | 1 | 1 | 1 | 1 | 2 | 1 | 1 | 2 | 2 | 1 | 2 | 2 | 1 | 20 |
| Helicopter Emergency     | PRE | OR | 31052200 | DC | CU | 2 | 1 | 1 | 1 | 1 | 2 | 1 | 1 | 2 | 2 | 1 | 2 | 0 | 1 | 18 |
| How is quality of card   | PRE | OR | 31358079 | DC | DR | 1 | 1 | 1 | 1 | 1 | 2 | 1 | 1 | 2 | 2 | 1 | 2 | 2 | 1 | 19 |
| Identification of return | PRE | OR | 30498975 | DC | RC | 3 | 1 | 1 | 1 | 1 | 2 | 1 | 1 | 0 | 2 | 1 | 2 | 0 | 1 | 17 |
| Impact of adrenaline d   | PRE | OR | 30991079 | DC | TD | 2 | 0 | 1 | 1 | 1 | 0 | 0 | 1 | 2 | 2 | 1 | 2 | 0 | 0 | 13 |
| Impact of cardiopulmo    | PRE | OR | 31767584 | DC | CU | 3 | 1 | 1 | 1 | 1 | 2 | 1 | 1 | 0 | 2 | 1 | 2 | 2 | 1 | 19 |
| Impact of cardiopulmo    | PRE | OR | 29855670 | DC | KY | 2 | 1 | 1 | 1 | 1 | 2 | 1 | 1 | 2 | 2 | 1 | 2 | 0 | 1 | 18 |
| Impact of prehospital r  | PRE | OR | 30681557 | DC | TD | 2 | 1 | 1 | 1 | 1 | 2 | 1 | 1 | 2 | 2 | 1 | 2 | 0 | 1 | 18 |

|                          |     |    |          |    |       |   |   |   |   |   |   |   |   |   |   |   |   |   |   |    |
|--------------------------|-----|----|----------|----|-------|---|---|---|---|---|---|---|---|---|---|---|---|---|---|----|
| Impact of prehospital r  | PRE | OR | 30681557 | DC | CU    | 2 | 1 | 1 | 1 | 1 | 2 | 1 | 0 | 2 | 0 | 0 | 0 | 0 | 1 | 12 |
| Impact of prehospital f  | PRE | OR | 30448503 | DC | KY    | 2 | 1 | 1 | 1 | 1 | 2 | 1 | 1 | 2 | 2 | 1 | 2 | 2 | 1 | 20 |
| Impact of synchronous    | PRE | OR | 31273676 | DC | CU    | 2 | 1 | 1 | 1 | 1 | 2 | 1 | 1 | 0 | 2 | 1 | 2 | 2 | 1 | 18 |
| Impact of type of emer   | PRE | OR | 31592321 | DC | TD    | 2 | 1 | 1 | 1 | 1 | 2 | 1 | 1 | 0 | 2 | 1 | 2 | 0 | 1 | 16 |
| Impact of type of emer   | PRE | OR | 31592321 | KH | TD/KH | 2 | 1 | 1 | 1 | 1 | 2 | 1 | 1 | 2 | 2 | 1 | 2 | 2 | 1 | 20 |
| Impedance Based Autc     | PRE | OR | 31945835 | DC | DR    | 2 | 1 | 1 | 1 | 1 | 2 | 1 | 1 | 2 | 2 | 1 | 2 | 2 | 1 | 20 |
| Implementation of a te   | PRE | OR | 31687999 | DC | TD    | 2 | 0 | 1 | 0 | 0 | 0 | 0 | 1 | 0 | 0 | 1 | 2 | 0 | 0 | 7  |
| Implications of long-te  | PRE | OR | 30861053 | DC | DR    | 2 | 1 | 1 | 1 | 1 | 2 | 1 | 1 | 2 | 2 | 1 | 2 | 2 | 1 | 20 |
| Improving emergency      | PRE | OR | 31734221 | DC | RC    | 2 | 1 | 1 | 1 | 1 | 2 | 1 | 1 | 2 | 2 | 1 | 2 | 2 | 1 | 20 |
| Improving emergency      | PRE | OR | 31734221 | KH | RC/KH | 1 | 1 | 1 | 1 | 1 | 2 | 1 | 1 | 2 | 2 | 1 | 2 | 2 | 1 | 19 |
| Improving rapid respo    | PRE | OR | 31144556 | DC | KY    | 1 | 1 | 1 | 1 | 1 | 2 | 1 | 1 | 2 | 2 | 1 | 2 | 2 | 1 | 19 |
| Improving rapid respo    | PRE | OR | 31144556 | DC | DC    | 2 | 1 | 1 | 1 | 1 | 2 | 1 | 1 | 0 | 0 | 0 | 0 | 0 | 1 | 11 |
| Influence of prehospi    | PRE | OR | 29752776 | DC | DR    | 2 | 1 | 1 | 1 | 1 | 2 | 1 | 1 | 2 | 2 | 1 | 2 | 2 | 1 | 20 |
| Initial end-tidal carbon | PRE | OR | 31742569 | KH | DR/KH | 2 | 1 | 1 | 1 | 1 | 2 | 1 | 1 | 2 | 2 | 1 | 2 | 2 | 1 | 20 |
| Initial end-tidal carbon | PRE | OR | 31742569 | DC | DR    | 2 | 1 | 1 | 1 | 1 | 2 | 1 | 1 | 2 | 2 | 1 | 2 | 2 | 1 | 20 |
| Intra-Arrest induction c | PRE | OR | 30427769 | DC | CU    | 2 | 1 | 1 | 1 | 1 | 2 | 1 | 1 | 2 | 2 | 1 | 2 | 2 | 1 | 20 |
| Intra-Arrest Induction c | PRE | OR | 30427769 | KH | CU/KH | 2 | 1 | 1 | 1 | 1 | 2 | 1 | 1 | 2 | 2 | 1 | 2 | 2 | 1 | 20 |
| Intraosseous versus int  | PRE | OR | 30391366 | DC | KY    | 2 | 1 | 1 | 1 | 1 | 2 | 1 | 1 | 2 | 2 | 1 | 2 | 2 | 1 | 20 |
| Intrathoracic Airway C   | PRE | OR | 30257100 | DC | DR    | 2 | 1 | 1 | 1 | 1 | 2 | 1 | 1 | 2 | 2 | 1 | 2 | 2 | 1 | 20 |
| Introduction of an Ext   | PRE | OR | 31886085 | DC | RC    | 2 | 1 | 1 | 1 | 1 | 2 | 1 | 1 | 2 | 2 | 1 | 2 | 0 | 1 | 18 |
| Kinetic analysis of car  | PRE | OR | 30974314 | DC | RC    | 2 | 1 | 1 | 1 | 1 | 2 | 1 | 1 | 2 | 2 | 1 | 2 | 2 | 1 | 20 |
| Kinetics of manual anc   | PRE | OR | 31639462 | DC | TD    | 2 | 1 | 1 | 1 | 1 | 2 | 1 | 1 | 0 | 2 | 1 | 2 | 0 | 0 | 15 |
| Levels of Catecholami    | PRE | OR | 31257337 | DC | RC    | 2 | 1 | 1 | 1 | 1 | 2 | 1 | 1 | 2 | 2 | 1 | 2 | 0 | 0 | 17 |
| Load distributing band   | PRE | OR | 30929972 | DC | TD    | 2 | 0 | 1 | 0 | 1 | 2 | 1 | 1 | 0 | 2 | 1 | 2 | 0 | 0 | 13 |
| Location of arrest and   | PRE | OR | 31326952 | DC | TD    | 2 | 1 | 1 | 1 | 1 | 2 | 1 | 1 | 2 | 2 | 1 | 2 | 0 | 1 | 18 |
| Locational effect on au  | PRE | OR | 31378298 | DC | TD    | 2 | 1 | 1 | 1 | 1 | 2 | 1 | 1 | 2 | 2 | 1 | 2 | 0 | 1 | 18 |
| LUCAS versus manua       | PRE | OR | 30590977 | DC | CU    | 3 | 1 | 1 | 1 | 1 | 2 | 1 | 1 | 2 | 2 | 1 | 2 | 2 | 1 | 21 |
| Machine learning as a    | PRE | OR | 30664917 | DC | RC    | 2 | 1 | 1 | 1 | 1 | 2 | 1 | 1 | 2 | 2 | 1 | 2 | 2 | 1 | 20 |
| Mandated 30-minute S     | PRE | OR | 31472942 | DC | DR    | 2 | 1 | 1 | 1 | 1 | 2 | 1 | 1 | 2 | 2 | 1 | 2 | 2 | 1 | 20 |
| Mandated 30-minute S     | PRE | OR | 31472942 | KH | DR/KH | 2 | 1 | 1 | 1 | 1 | 0 | 0 | 0 | 2 | 2 | 0 | 2 | 2 | 1 | 15 |
| Maximum value of en      | PRE | OR | 31613696 | DC | CU    | 2 | 1 | 1 | 1 | 1 | 2 | 1 | 0 | 2 | 2 | 1 | 2 | 2 | 1 | 19 |
| Medical dispatcher' pe   | Pre | OR | 30683139 | DC | CU    | 2 | 1 | 1 | 1 | 1 | 2 | 1 | 1 | 2 | 2 | 1 | 2 | 2 | 1 | 20 |
| Mobile phone-based al    | PRE | OR | 31887366 | DC | RC    | 2 | 1 | 1 | 1 | 1 | 2 | 1 | 1 | 2 | 2 | 1 | 2 | 2 | 1 | 20 |
| Motivation, challenges   | PRE | OR | 31399458 | DC | CU    | 3 | 1 | 1 | 1 | 1 | 2 | 1 | 1 | 2 | 2 | 1 | 0 | 0 | 1 | 17 |
| Multimedia-aided inst    | PRE | OR | 31246511 | DC | DR    | 2 | 1 | 1 | 1 | 1 | 2 | 1 | 1 | 2 | 2 | 1 | 2 | 2 | 1 | 20 |
| Near-infrared spectros   | PRE | OR | 30446504 | DC | TD    | 2 | 1 | 1 | 1 | 1 | 0 | 0 | 1 | 2 | 2 | 1 | 2 | 0 | 1 | 15 |
| North American valida    | PRE | OR | 30639788 | DC | TD    | 4 | 1 | 1 | 1 | 1 | 2 | 1 | 1 | 2 | 2 | 1 | 2 | 2 | 1 | 22 |
| One year experience wi   | PRE | OR | 31401135 | DC | CU    | 2 | 1 | 1 | 1 | 1 | 2 | 0 | 1 | 0 | 2 | 1 | 2 | 2 | 1 | 17 |
| One year experience wi   | PRE | OR | 31401135 | DC | DR    | 2 | 1 | 1 | 1 | 1 | 2 | 1 | 1 | 2 | 2 | 1 | 2 | 2 | 1 | 20 |
| Original articleImpact   | PRE | OR | 31439715 | DC | KY    | 3 | 1 | 1 | 1 | 1 | 0 | 0 | 1 | 2 | 0 | 1 | 0 | 0 | 1 | 12 |
| Out of hospital cardiac  | PRE | OR | 30597132 | DC | CU    | 2 | 1 | 1 | 1 | 1 | 2 | 1 | 1 | 2 | 2 | 1 | 2 | 2 | 1 | 20 |
| Out of hospital cardiac  | PRE | OR | 31857141 | DC | CU    | 2 | 1 | 1 | 1 | 1 | 2 | 1 | 1 | 2 | 2 | 1 | 2 | 2 | 1 | 20 |
| Out of hospital cardiac  | PRE | OR | 31692808 | DC | RC    | 2 | 1 | 1 | 1 | 1 | 0 | 1 | 1 | 0 | 2 | 1 | 2 | 0 | 1 | 14 |
| Out-of-hospital cardiac  | PRE | OR | 30119989 | DC | TD    | 2 | 1 | 1 | 1 | 1 | 2 | 1 | 1 | 2 | 2 | 1 | 2 | 0 | 0 | 17 |
| Outcome after out-of-h   | PRE | OR | 31401807 | DC | KY    | 3 | 1 | 1 | 1 | 1 | 0 | 0 | 1 | 2 | 2 | 1 | 0 | 2 | 1 | 16 |
| Outcomes for Hemodi      | PRE | OR | 30733235 | DC | KY    | 2 | 1 | 1 | 1 | 1 | 2 | 1 | 0 | 2 | 2 | 1 | 2 | 0 | 1 | 17 |
| Paramedic attitudes an   | PRE | OR | 31791962 | DC | RC    | 1 | 1 | 1 | 1 | 1 | 2 | 1 | 1 | 2 | 2 | 1 | 2 | 2 | 1 | 19 |
| Paramedic attitudes an   | PRE | OR | 31791962 | KH | RC/KH | 1 | 1 | 1 | 1 | 1 | 2 | 1 | 1 | 2 | 2 | 1 | 2 | 2 | 1 | 19 |
| Paramedic equipment l    | PRE | OR | 31670157 | DC | DR    | 4 | 1 | 1 | 1 | 1 | 2 | 1 | 1 | 2 | 2 | 1 | 2 | 2 | 1 | 22 |
| Passivelegraisinginout   | PRE | OR | 30790693 | DC | KY    | 2 | 1 | 1 | 1 | 1 | 2 | 1 | 1 | 2 | 2 | 1 | 2 | 0 | 1 | 18 |
| Phenomenological stu     | PRE | OR | 31427472 | DC | TD    | 1 | 1 | 1 | 1 | 1 | 2 | 1 | 1 | 2 | 2 | 1 | 2 | 0 | 1 | 17 |
| Phenomenological :       | PRE | OR | 31427472 | DC | DC    | 1 | 1 | 1 | 1 | 1 | 2 | 0 | 1 | 0 | 2 | 1 | 0 | 0 | 1 | 12 |
| Pilot Study of the Eff   | PRE | OR | 31042341 | DC | KY    | 1 | 1 | 1 | 1 | 1 | 0 | 0 | 0 | 2 | 2 | 1 | 2 | 2 | 1 | 15 |

|                          |     |    |          |    |       |   |   |   |   |   |   |   |   |   |   |   |   |   |   |    |    |
|--------------------------|-----|----|----------|----|-------|---|---|---|---|---|---|---|---|---|---|---|---|---|---|----|----|
| Pre-hospital advanced    | PRE | OR | 30819685 | DC | KY    | 2 | 1 | 1 | 1 | 1 | 2 | 1 | 1 | 2 | 2 | 1 | 2 | 2 | 1 | 20 |    |
| Predictors of Out of H   | PRE | OR | 31555766 | DC | CU    | 2 | 1 | 1 | 1 | 1 | 2 | 1 | 1 | 2 | 2 | 1 | 2 | 2 | 1 | 20 |    |
| Prehospital advanced c   | PRE | OR | 30001817 | DC | CU    | 2 | 1 | 1 | 1 | 1 | 2 | 1 | 1 | 2 | 2 | 1 | 2 | 2 | 1 | 20 |    |
| Prehospital advanced c   | PRE | OR | 30001817 | KH | CU/KH | 2 | 1 | 1 | 1 | 1 | 2 | 0 | 1 | 2 | 2 | 1 | 2 | 2 | 1 | 19 |    |
| Prehospital cardiopulnr  | PRE | OR | 31443673 | DC | KY    | 1 | 1 | 1 | 1 | 1 | 2 | 1 | 1 | 2 | 2 | 1 | 2 | 2 | 1 | 19 |    |
| Prehospital cardiopulnr  | PRE | OR | 30883667 | DC | KY    | 2 | 1 | 1 | 1 | 1 | 2 | 1 | 1 | 2 | 2 | 1 | 2 | 2 | 1 | 20 |    |
| Prehospital determinar   | PRE | OR | 31003991 | DC | TD    | 2 | 1 | 1 | 1 | 1 | 2 | 1 | 1 | 2 | 2 | 1 | 0 | 0 | 0 | 15 |    |
| Prehospital extracorpor  | PRE | OR | 31264379 | DC | TD    | 2 | 1 | 1 | 1 | 1 | 2 | 1 | 1 | 0 | 0 | 1 | 0 | 0 | 1 | 12 |    |
| Preliminary experience   | PRE | OR | 30605711 | DC | RC    | 2 | 1 | 1 | 1 | 1 | 2 | 1 | 1 | 2 | 2 | 1 | 2 | 0 | 1 | 18 |    |
| Prevalence and Predict   | PRE | OR | 31566990 | DC | RC    | 1 | 1 | 1 | 1 | 1 | 2 | 1 | 1 | 2 | 2 | 1 | 0 | 0 | 1 | 15 |    |
| Public access of autom   | PRE | OR | 31129230 | DC | DR    | 2 | 1 | 1 | 1 | 1 | 2 | 1 | 1 | 2 | 2 | 1 | 2 | 2 | 1 | 20 |    |
| Public Knowledge and     | PRE | OR | 30375018 | DC | CU    | 2 | 1 | 1 | 1 | 1 | 2 | 1 | 1 | 2 | 2 | 1 | 2 | 2 | 1 | 20 |    |
| Public-access defibrill  | PRE | OR | 31862250 | DC | KY    | 2 | 1 | 1 | 1 | 1 | 2 | 1 | 1 | 2 | 2 | 1 | 2 | 2 | 1 | 20 |    |
| Quality metrics for the  | PRE | OR | 31129229 | DC | CU    | 2 | 1 | 1 | 1 | 0 | 0 | 0 | 1 | 0 | 0 | 0 | 2 | 0 | 0 | 8  |    |
| Quality of physician c   | PRE | OR | 31785983 | DC | KY    | 2 | 1 | 1 | 1 | 1 | 2 | 1 | 1 | 2 | 0 | 0 | 1 | 2 | 2 | 1  | 18 |
| Randomised controllex    | PRE | OR | 31015214 | DC | KY    | 3 | 1 | 1 | 1 | 1 | 2 | 1 | 1 | 2 | 2 | 1 | 0 | 0 | 1 | 17 |    |
| Randomised controllex    | PRE | OR | 31015214 | KH | KY/KH | 3 | 1 | 1 | 1 | 1 | 2 | 1 | 1 | 2 | 2 | 1 | 2 | 2 | 1 | 21 |    |
| Real-life time and dist  | PRE | OR | 31141717 | DC | TD    | 2 | 1 | 1 | 1 | 1 | 0 | 0 | 1 | 0 | 2 | 1 | 2 | 0 | 0 | 12 |    |
| Real-time cardiopulmc    | PRE | OR | 31708314 | DC | TD    | 2 | 0 | 1 | 1 | 1 | 2 | 1 | 1 | 2 | 0 | 1 | 2 | 0 | 0 | 14 |    |
| Recording Out-of-Hosj    | PRE | OR | 30130413 | DC | DR    | 2 | 1 | 1 | 1 | 1 | 2 | 1 | 1 | 2 | 2 | 1 | 2 | 2 | 1 | 20 |    |
| Regurgitation and pulr   | PRE | OR | 30811470 | DC | RC    | 3 | 1 | 1 | 1 | 1 | 2 | 1 | 1 | 0 | 2 | 1 | 2 | 0 | 1 | 17 |    |
| Relationship between l   | PRE | OR | 31179947 | DC | DR    | 1 | 1 | 1 | 1 | 1 | 2 | 1 | 1 | 2 | 2 | 1 | 2 | 2 | 1 | 19 |    |
| Repeated adrenaline dc   | PRE | OR | 30708076 | DC | RC    | 2 | 1 | 1 | 1 | 1 | 2 | 1 | 1 | 2 | 2 | 1 | 2 | 2 | 1 | 20 |    |
| Rescue transesophagea    | PRE | OR | 31820822 | DC | CU    | 1 | 1 | 0 | 1 | 0 | 0 | 0 | 1 | 0 | 2 | 1 | 2 | 2 | 1 | 12 |    |
| RESUSCITATIVE EN         | PRE | OR | 30067564 | DC | KY    | 3 | 1 | 1 | 1 | 1 | 2 | 1 | 1 | 2 | 2 | 1 | 2 | 2 | 1 | 21 |    |
| Resuscitative endovasc   | PRE | OR | 31076474 | DC | RC    | 2 | 1 | 1 | 1 | 1 | 2 | 1 | 1 | 2 | 2 | 1 | 2 | 2 | 1 | 20 |    |
| Resuscitative Endovas    | PRE | OR | 30067564 | KH | KY/KH | 3 | 1 | 1 | 1 | 1 | 2 | 1 | 1 | 2 | 2 | 1 | 2 | 2 | 1 | 21 |    |
| Safety and Effectivene   | PRE | OR | 30556765 | DC | TD    | 2 | 1 | 1 | 1 | 1 | 2 | 1 | 1 | 2 | 2 | 1 | 2 | 2 | 1 | 20 |    |
| Sample size estimator    | PRE | OR | 31049459 | DC | DR    | 2 | 1 | 1 | 1 | 0 | 2 | 1 | 1 | 2 | 2 | 1 | 2 | 2 | 1 | 19 |    |
| Should we resuscitate    | PRE | OR | 31641038 | DC | KY    | 2 | 1 | 1 | 1 | 1 | 2 | 1 | 1 | 2 | 2 | 1 | 2 | 2 | 1 | 20 |    |
| Sign of life is associat | PRE | OR | 30737554 | DC | TD    | 2 | 1 | 1 | 1 | 1 | 2 | 0 | 1 | 0 | 2 | 1 | 2 | 0 | 1 | 15 |    |
| Significance of automa   | PRE | OR | 31297625 | DC | DR    | 2 | 1 | 1 | 1 | 1 | 2 | 1 | 1 | 2 | 2 | 1 | 2 | 2 | 1 | 20 |    |
| Simulating Public Bu     | PRE | OR | 31124734 | DC | TD    | 2 | 1 | 1 | 1 | 1 | 0 | 1 | 1 | 0 | 2 | 1 | 2 | 0 | 1 | 14 |    |
| Simulation training en   | PRE | OR | 30862530 | DC | DR    | 2 | 1 | 1 | 1 | 1 | 2 | 1 | 1 | 2 | 2 | 1 | 2 | 2 | 1 | 20 |    |
| Simulation training en   | PRE | OR | 30862530 | DC | RC    | 2 | 1 | 1 | 1 | 1 | 2 | 1 | 1 | 2 | 2 | 1 | 2 | 0 | 1 | 18 |    |
| Skeletal and soft tissu  | PRE | OR | 30649242 | DC | TD    | 2 | 1 | 1 | 1 | 1 | 2 | 0 | 1 | 2 | 2 | 1 | 2 | 2 | 1 | 19 |    |
| Survival in Out-of-Ho    | PRE | OR | 30929457 | DC | KY    | 3 | 1 | 1 | 1 | 1 | 0 | 0 | 1 | 2 | 2 | 1 | 2 | 2 | 1 | 18 |    |
| Survival to hospital di  | PRE | OR | 30708074 | DC | TD    | 3 | 1 | 1 | 1 | 1 | 2 | 1 | 1 | 2 | 2 | 1 | 2 | 0 | 0 | 18 |    |
| Survival to hospital di  | PRE | OR | 30708074 | KH | TD/KH | 2 | 1 | 1 | 1 | 1 | 2 | 1 | 1 | 2 | 2 | 1 | 2 | 2 | 1 | 20 |    |
| Synchronized Chest C     | PRE | OR | 31697562 | DC | RC    | 4 | 1 | 1 | 1 | 1 | 2 | 1 | 1 | 0 | 2 | 1 | 2 | 0 | 1 | 18 |    |
| Textmessagealertsyste    | PRE | OR | 30902689 | DC | KY    | 3 | 1 | 1 | 1 | 1 | 0 | 0 | 1 | 2 | 2 | 1 | 2 | 2 | 1 | 18 |    |
| Theeffectofdispatcher-a  | PRE | OR | 30639789 | DC | KY    | 2 | 1 | 1 | 1 | 1 | 2 | 0 | 1 | 2 | 2 | 1 | 2 | 2 | 1 | 19 |    |
| Theeffectofintravenous   | PRE | OR | 30708075 | DC | KY    | 3 | 1 | 1 | 1 | 1 | 2 | 0 | 1 | 2 | 2 | 1 | 2 | 2 | 1 | 20 |    |
| The Additive Effect of   | PRE | OR | 30799340 | DC | TD    | 2 | 1 | 1 | 1 | 1 | 2 | 1 | 1 | 2 | 2 | 1 | 2 | 0 | 1 | 18 |    |
| The assessment of kin    | pre | OR | 30736850 | DC | CU    | 2 | 1 | 1 | 1 | 0 | 2 | 1 | 1 | 2 | 0 | 1 | 2 | 2 | 1 | 17 |    |
| The Association of the   | PRE | OR | 31248676 | DC | KY    | 2 | 1 | 1 | 1 | 1 | 2 | 1 | 1 | 2 | 2 | 1 | 2 | 2 | 1 | 20 |    |
| The Case for Drone-as    | PRE | OR | 31278178 | DC | RC    | 1 | 1 | 1 | 1 | 1 | 2 | 1 | 1 | 2 | 2 | 1 | 2 | 2 | 1 | 19 |    |
| The effect of automatic  | PRE | OR | 31225932 | DC | CU    | 3 | 1 | 1 | 1 | 1 | 0 | 0 | 1 | 2 | 2 | 1 | 2 | 2 | 1 | 18 |    |
| The effect of operator p | PRE | OR | 31813404 | DC | TD    | 3 | 1 | 1 | 1 | 1 | 2 | 1 | 1 | 2 | 2 | 1 | 2 | 2 | 1 | 21 |    |
| The effect of prehospi   | PRE | OR | 31412291 | DC | RC    | 2 | 1 | 1 | 1 | 1 | 2 | 1 | 1 | 2 | 2 | 1 | 2 | 0 | 1 | 18 |    |
| The Effect of Transpor   | PRE | OR | 30863269 | DC | KY    | 2 | 1 | 1 | 1 | 1 | 0 | 0 | 1 | 2 | 2 | 1 | 2 | 2 | 1 | 17 |    |
| The effect of ventilatio | PRE | OR | 30946921 | DC | TD    | 2 | 0 | 1 | 1 | 1 | 2 | 1 | 1 | 2 | 2 | 1 | 0 | 0 | 1 | 15 |    |
| THE EFFECTS OF T         | PRE | OR | 30052583 | DC | KY    | 4 | 1 | 1 | 1 | 1 | 2 | 1 | 1 | 2 | 2 | 1 | 0 | 2 | 1 | 20 |    |

|                          |     |    |          |    |       |   |   |   |   |   |   |   |   |   |   |   |   |   |   |    |
|--------------------------|-----|----|----------|----|-------|---|---|---|---|---|---|---|---|---|---|---|---|---|---|----|
| The impact of real-tim   | PRE | OR | 31446232 | DC | DR    | 2 | 1 | 1 | 1 | 1 | 2 | 1 | 1 | 2 | 2 | 1 | 2 | 2 | 1 | 20 |
| The impact of resuscit   | PRE | OR | 31330198 | DC | RC    | 3 | 1 | 1 | 1 | 1 | 2 | 1 | 1 | 2 | 2 | 1 | 2 | 2 | 1 | 21 |
| The incidence of airwa   | PRE | OR | 31767676 | DC | CU    | 2 | 1 | 1 | 1 | 1 | 2 | 1 | 1 | 2 | 2 | 1 | 2 | 2 | 1 | 20 |
| The Maximum Diamet       | PRE | OR | 31585685 | DC | RC    | 2 | 1 | 1 | 1 | 1 | 2 | 1 | 1 | 2 | 2 | 1 | 0 | 0 | 1 | 16 |
| The performance of a r   | PRE | OR | 31377393 | DC | RC    | 2 | 1 | 1 | 1 | 1 | 2 | 1 | 1 | 2 | 2 | 1 | 2 | 2 | 1 | 20 |
| The POCUS pulse che      | PRE | OR | 30902687 | DC | TD    | 3 | 1 | 1 | 1 | 1 | 2 | 1 | 1 | 2 | 2 | 1 | 2 | 0 | 1 | 19 |
| The presence of psych    | PRE | OR | 31251894 | DC | RC    | 1 | 1 | 1 | 1 | 1 | 2 | 1 | 1 | 2 | 2 | 1 | 0 | 0 | 1 | 15 |
| The use of dispatcher ε  | PRE | OR | 30876922 | DC | DR    | 4 | 1 | 1 | 1 | 1 | 2 | 1 | 1 | 2 | 2 | 1 | 2 | 2 | 1 | 22 |
| Time from arrest to ex   | PRE | OR | 31155852 | DC | CU    | 2 | 1 | 1 | 1 | 1 | 2 | 1 | 1 | 2 | 2 | 1 | 2 | 2 | 1 | 20 |
| Timing of advanced ai    | PRE | OR | 30912467 | DC | TD    | 2 | 1 | 1 | 1 | 1 | 2 | 1 | 1 | 2 | 2 | 1 | 2 | 2 | 1 | 20 |
| Towards a non-invasiv    | PRE | OR | 30365974 | DC | TD    | 3 | 1 | 1 | 1 | 1 | 2 | 1 | 1 | 2 | 2 | 1 | 2 | 0 | 1 | 19 |
| Traumatic cardiac arres  | PRE | OR | 30032348 | DC | DR    | 2 | 1 | 1 | 1 | 1 | 2 | 1 | 1 | 2 | 2 | 1 | 2 | 2 | 1 | 20 |
| Trends in survival fro   | PRE | OR | 31430512 | DC | DR    | 2 | 1 | 1 | 1 | 1 | 2 | 1 | 1 | 2 | 2 | 1 | 2 | 2 | 1 | 20 |
| Trends in the use of in  | PRE | OR | 31197835 | DC | TD    | 2 | 1 | 1 | 1 | 1 | 2 | 1 | 1 | 0 | 0 | 1 | 0 | 0 | 1 | 12 |
| Use of Mechanical Car    | PRE | OR | 31617923 | KH | KY/KH | 2 | 1 | 1 | 1 | 1 | 0 | 0 | 1 | 2 | 2 | 1 | 2 | 2 | 1 | 17 |
| Use of Mechanical Car    | PRE | OR | 31617923 | DC | KY    | 2 | 1 | 1 | 1 | 1 | 2 | 1 | 1 | 2 | 2 | 1 | 2 | 0 | 1 | 18 |
| Use of motorlance to d   | PRE | OR | 31602431 | DC | CU    | 2 | 1 | 1 | 1 | 1 | 2 | 1 | 1 | 0 | 2 | 1 | 2 | 2 | 1 | 18 |
| Use of resuscitative ba  | PRE | OR | 31121206 | DC | CU    | 3 | 1 | 1 | 1 | 1 | 2 | 0 | 1 | 0 | 2 | 1 | 0 | 2 | 1 | 16 |
| Use of selected teleme   | PRE | OR | 30952832 | DC | CU    | 2 | 1 | 1 | 1 | 1 | 2 | 1 | 1 | 2 | 2 | 1 | 2 | 2 | 1 | 20 |
| Usefulness of a stool t  | PRE | OR | 31395031 | DC | DR    | 4 | 1 | 1 | 1 | 1 | 2 | 1 | 1 | 0 | 0 | 0 | 2 | 0 | 0 | 14 |
| Usefulness of cerebral   | PRE | OR | 31004721 | DC | KY    | 2 | 1 | 1 | 1 | 1 | 2 | 1 | 1 | 2 | 2 | 1 | 2 | 2 | 1 | 20 |
| Using a smartwatch wi    | PRE | OR | 31078650 | DC | TD    | 3 | 1 | 1 | 1 | 1 | 2 | 1 | 1 | 0 | 2 | 1 | 2 | 0 | 1 | 17 |
| Using an Immersive V     | PRE | OR | 30407959 | DC | RC    | 1 | 1 | 1 | 1 | 1 | 2 | 0 | 1 | 2 | 2 | 1 | 2 | 2 | 1 | 18 |
| Using an Immersive V     | PRE | OR | 30407959 | KH | RC/KH | 1 | 1 | 1 | 1 | 1 | 0 | 0 | 0 | 2 | 2 | 1 | 0 | 0 | 1 | 11 |
| Utility of CPR machin    | PRE | OR | 31239492 | DC | CU    | 3 | 1 | 1 | 1 | 0 | 2 | 1 | 1 | 0 | 2 | 1 | 2 | 0 | 1 | 16 |
| Ventilation feedback d   | PRE | OR | 31640797 | DC | CU    | 3 | 1 | 1 | 1 | 1 | 2 | 1 | 1 | 2 | 2 | 1 | 2 | 2 | 1 | 21 |
| Ventilation feedback d   | PRE | OR | 31640797 | KH | CU/KH | 3 | 1 | 1 | 1 | 1 | 2 | 1 | 1 | 2 | 2 | 1 | 2 | 2 | 1 | 21 |
| Vital sign patterns bef  | PRE | OR | 30926452 | DC | SC    | 1 | 1 | 1 | 1 | 1 | 2 | 1 | 1 | 0 | 2 | 1 | 0 | 0 | 1 | 13 |
| A feasibility study for  | PRO | OR | 30599180 | CM | TK    | 2 | 1 | 1 | 1 | 1 | 2 | 1 | 1 | 0 | 2 | 1 | 0 | 0 | 1 | 14 |
| A machine learning ba    | PRO | OR | 30885826 | SW | CM    | 2 | 1 | 1 | 1 | 1 | 2 | 0 | 1 | 0 | 2 | 1 | 0 | 0 | 1 | 13 |
| Angiographic character   | PRO | OR | 30280478 | CM | JP    | 2 | 1 | 1 | 1 | 1 | 0 | 0 | 1 | 0 | 2 | 1 | 2 | 0 | 1 | 13 |
| Aortic stenosis is an ir | PRO | OR | 30818015 | CM | SZ    | 2 | 1 | 1 | 1 | 0 | 2 | 0 | 1 | 0 | 2 | 1 | 0 | 0 | 0 | 11 |
| Assessment of serum l    | PRO | OR | 30781939 | CM | SZ    | 2 | 1 | 1 | 1 | 1 | 2 | 1 | 1 | 0 | 2 | 1 | 0 | 0 | 1 | 14 |
| Association between A    | PRO | OR | 31540352 | CM | SW    | 2 | 1 | 1 | 1 | 1 | 2 | 0 | 1 | 0 | 2 | 1 | 0 | 0 | 1 | 13 |
| Association between a    | PRO | OR | 31521016 | CM | TK    | 2 | 1 | 1 | 1 | 1 | 2 | 1 | 1 | 0 | 2 | 1 | 2 | 0 | 0 | 15 |
| Association between a    | PRO | OR | 31521016 | CM | CM    | 2 | 1 | 1 | 1 | 1 | 2 | 1 | 1 | 0 | 2 | 1 | 0 | 0 | 0 | 13 |
| Association Between E    | PRO | OR | 30303836 | CM | CC    | 2 | 1 | 1 | 1 | 1 | 2 | 0 | 1 | 2 | 2 | 1 | 2 | 2 | 1 | 19 |
| Association Between E    | PRO | OR | 30303836 | CM | CM    | 2 | 1 | 1 | 1 | 1 | 2 | 0 | 1 | 2 | 2 | 1 | 2 | 0 | 1 | 17 |
| Association between ly   | PRO | OR | 30651995 | CM | TK    | 2 | 1 | 1 | 1 | 1 | 2 | 0 | 1 | 0 | 2 | 1 | 2 | 0 | 1 | 15 |
| Association between se   | PRO | OR | 31541979 | CM | SZ    | 2 | 1 | 1 | 1 | 1 | 2 | 1 | 1 | 0 | 2 | 1 | 2 | 0 | 1 | 16 |
| Associations between c   | PRO | OR | 31493983 | CM | JP    | 2 | 1 | 1 | 1 | 1 | 2 | 1 | 1 | 0 | 2 | 1 | 2 | 0 | 1 | 16 |
| Associations between i   | PRO | OR | 31786236 | CM | SW    | 2 | 1 | 1 | 1 | 1 | 2 | 1 | 1 | 0 | 2 | 1 | 0 | 0 | 1 | 14 |
| Associations between j   | PRO | OR | 30691510 | CM | JP    | 3 | 1 | 1 | 1 | 1 | 2 | 1 | 1 | 2 | 2 | 1 | 0 | 0 | 1 | 17 |
| Beyond dichotomy: pe     | PRO | OR | 31215475 | CM | CC    | 2 | 1 | 1 | 1 | 1 | 2 | 1 | 1 | 0 | 2 | 1 | 2 | 0 | 1 | 16 |
| Brain computed tomog     | PRO | OR | 31910500 | CM | TK    | 2 | 1 | 1 | 1 | 1 | 2 | 1 | 1 | 0 | 2 | 1 | 2 | 0 | 0 | 15 |
| Brain computed tomog     | PRO | OR | 31910500 | CM | CM    | 2 | 1 | 1 | 1 | 0 | 2 | 1 | 1 | 0 | 2 | 1 | 2 | 0 | 0 | 14 |
| Brain Diffusion Imagi    | PRO | OR | 31107566 | CM | SZ    | 2 | 1 | 1 | 1 | 1 | 2 | 1 | 1 | 2 | 2 | 1 | 2 | 0 | 1 | 18 |
| Brain Hypoxia Second     | PRO | OR | 31789834 | CM | CC    | 2 | 1 | 1 | 1 | 1 | 2 | 0 | 1 | 0 | 2 | 1 | 0 | 0 | 1 | 13 |
| Brain Hypoxia Second     | PRO | OR | 31789834 | CM | CM    | 2 | 1 | 1 | 1 | 1 | 2 | 0 | 1 | 0 | 2 | 1 | 0 | 0 | 1 | 13 |
| Cardiac Arrest in Patie  | PRO | OR | 31272121 | SW | CM    | 2 | 1 | 1 | 1 | 1 | 0 | 0 | 1 | 0 | 0 | 0 | 2 | 0 | 0 | 9  |
| Cardiac arrest in takots | PRO | OR | 31098611 | CM | JP    | 2 | 1 | 1 | 1 | 1 | 2 | 0 | 1 | 0 | 0 | 1 | 0 | 0 | 1 | 11 |
| CaRdial Arrest Surviv    | PRO | OR | 31730900 | CM | SZ    | 2 | 1 | 1 | 1 | 0 | 2 | 0 | 1 | 0 | 2 | 1 | 2 | 0 | 1 | 14 |
| Cardiac output during    | PRO | OR | 31362189 | CM | CC    | 2 | 1 | 1 | 1 | 1 | 2 | 1 | 1 | 0 | 0 | 1 | 0 | 0 | 1 | 12 |

|                                |     |    |          |    |    |   |   |   |   |   |   |   |   |   |   |   |   |   |   |    |
|--------------------------------|-----|----|----------|----|----|---|---|---|---|---|---|---|---|---|---|---|---|---|---|----|
| Cardiac output, heart r        | PRO | OR | 31362081 | CM | TK | 3 | 1 | 1 | 1 | 1 | 2 | 1 | 1 | 0 | 2 | 1 | 2 | 0 | 1 | 17 |
| Cardiogenic Shock Cl           | PRO | OR | 31548097 | CM | jp | 2 | 1 | 1 | 1 | 1 | 2 | 1 | 1 | 2 | 2 | 1 | 2 | 2 | 1 | 20 |
| Cerebrovascular autore         | PRO | OR | 31282566 | CM | SZ | 2 | 1 | 1 | 0 | 0 | 2 | 0 | 1 | 0 | 2 | 1 | 0 | 0 | 1 | 11 |
| Change in neuron spec          | PRO | OR | 30935900 | CM | JP | 2 | 1 | 1 | 1 | 1 | 2 | 0 | 1 | 0 | 2 | 1 | 2 | 2 | 1 | 17 |
| Chemokine RANTES               | PRO | OR | 31043991 | CM | TK | 3 | 1 | 1 | 1 | 0 | 2 | 1 | 1 | 0 | 2 | 1 | 0 | 0 | 1 | 14 |
| Circulating Levels of r        | PRO | OR | 31275442 | SW | CM | 3 | 1 | 1 | 1 | 1 | 2 | 1 | 1 | 2 | 2 | 1 | 0 | 0 | 1 | 17 |
| Clinical and Angiogra          | PRO | OR | 29459218 | CM | JP | 2 | 1 | 1 | 1 | 1 | 2 | 0 | 1 | 0 | 2 | 1 | 2 | 0 | 1 | 15 |
| Cognitive Impairment           | PRO | OR | 31781396 | CM | TK | 3 | 1 | 1 | 1 | 1 | 2 | 1 | 1 | 0 | 2 | 1 | 0 | 0 | 1 | 15 |
| Cognitive Impairment           | PRO | OR | 31781396 | CM | CM | 3 | 1 | 1 | 1 | 1 | 2 | 1 | 1 | 0 | 2 | 1 | 0 | 0 | 1 | 15 |
| Combination of Early           | PRO | OR | 31214555 | CM | CC | 2 | 1 | 1 | 1 | 1 | 2 | 0 | 0 | 0 | 2 | 1 | 0 | 0 | 1 | 12 |
| Combination of Early           | PRO | OR | 31214555 | CM | CM | 2 | 1 | 1 | 1 | 1 | 2 | 0 | 0 | 0 | 2 | 1 | 0 | 0 | 1 | 12 |
| Combination of S100I           | PRO | OR | 30732223 | SW | CM | 3 | 1 | 1 | 1 | 1 | 2 | 1 | 1 | 0 | 2 | 1 | 0 | 0 | 1 | 15 |
| Combination of S100I           | PRO | OR | 30732223 | CM | SZ | 2 | 1 | 1 | 1 | 0 | 2 | 1 | 1 | 0 | 2 | 1 | 0 | 0 | 1 | 13 |
| COMMENCE trial (C              | PRO | OR | 31815641 | CM | JP | 4 | 1 | 1 | 1 | 1 | 2 | 1 | 1 | 0 | 2 | 1 | 0 | 0 | 1 | 16 |
| Complications of venc          | PRO | OR | 31394965 | CM | TK | 2 | 1 | 1 | 1 | 1 | 2 | 1 | 1 | 0 | 2 | 1 | 0 | 0 | 0 | 13 |
| Contemporary impacts           | PRO | OR | 31310845 | CM | SW | 2 | 1 | 1 | 1 | 1 | 2 | 1 | 1 | 0 | 2 | 1 | 0 | 0 | 1 | 14 |
| Coronary artery calcifi        | PRO | OR | 31901459 | CM | TK | 2 | 1 | 1 | 1 | 1 | 2 | 0 | 1 | 0 | 2 | 1 | 2 | 0 | 1 | 15 |
| Coronary artery calcifi        | PRO | OR | 31901459 | CM | CM | 2 | 1 | 1 | 1 | 1 | 2 | 0 | 1 | 0 | 2 | 1 | 2 | 0 | 1 | 15 |
| Correlation of Patients        | PRO | OR | 31172117 | CM | SZ | 2 | 1 | 1 | 1 | 0 | 2 | 0 | 1 | 0 | 0 | 1 | 0 | 0 | 0 | 9  |
| Cortical Thickness and         | PRO | OR | 30979357 | SW | CM | 2 | 1 | 1 | 1 | 1 | 2 | 1 | 1 | 0 | 2 | 1 | 0 | 0 | 1 | 14 |
| Deep learning based ot         | PRO | OR | 30978378 | CM | CC | 2 | 1 | 1 | 1 | 1 | 2 | 1 | 1 | 0 | 2 | 1 | 0 | 0 | 1 | 14 |
| Derivation and Validat         | PRO | OR | 30819521 | CM | JP | 2 | 1 | 1 | 1 | 1 | 2 | 0 | 0 | 0 | 2 | 1 | 2 | 0 | 1 | 14 |
| Derivation and Validat         | PRO | OR | 30819521 | CM | CC | 2 | 1 | 1 | 1 | 1 | 2 | 0 | 1 | 0 | 2 | 1 | 2 | 2 | 1 | 17 |
| Derivation and Validat         | PRO | OR | 30819521 | CM | CM | 2 | 1 | 1 | 1 | 1 | 2 | 0 | 1 | 0 | 2 | 1 | 2 | 0 | 1 | 15 |
| Detailed analysis of he        | PRO | OR | 30385386 | CM | SZ | 2 | 1 | 1 | 1 | 1 | 2 | 1 | 1 | 2 | 2 | 1 | 0 | 0 | 1 | 16 |
| Determination of Cut- $\alpha$ | PRO | OR | 31431922 | SW | CM | 2 | 1 | 1 | 1 | 0 | 2 | 1 | 1 | 0 | 2 | 1 | 0 | 0 | 0 | 12 |
| Development and Exte           | PRO | OR | 30001950 | CM | JP | 2 | 1 | 1 | 1 | 1 | 2 | 0 | 1 | 0 | 2 | 1 | 2 | 0 | 1 | 15 |
| Diagnostic and prognos         | PRO | OR | 31201884 | CM | SZ | 2 | 1 | 1 | 1 | 1 | 0 | 0 | 1 | 0 | 2 | 1 | 0 | 0 | 1 | 11 |
| Differential associatio        | PRO | OR | 30586605 | CM | SW | 2 | 1 | 1 | 1 | 1 | 2 | 1 | 1 | 0 | 2 | 1 | 0 | 0 | 1 | 14 |
| Distinct predictive val        | PRO | OR | 30951843 | SW | CM | 2 | 1 | 1 | 1 | 1 | 2 | 1 | 1 | 2 | 2 | 1 | 0 | 0 | 1 | 16 |
| Do combined ultrasou           | PRO | OR | 31566175 | CM | TK | 2 | 1 | 1 | 1 | 1 | 2 | 0 | 0 | 0 | 2 | 1 | 2 | 0 | 0 | 13 |
| Do combined ultrasou           | PRO | OR | 31566175 | CM | CM | 2 | 1 | 1 | 1 | 0 | 2 | 0 | 0 | 0 | 2 | 1 | 2 | 0 | 1 | 13 |
| Doppler sonography of          | PRO | OR | 31145934 | CM | CC | 2 | 1 | 1 | 1 | 1 | 2 | 1 | 1 | 2 | 2 | 1 | 2 | 0 | 1 | 18 |
| Early blood transcript         | PRO | OR | 30885824 | CM | CC | 3 | 1 | 1 | 1 | 1 | 0 | 0 | 1 | 2 | 2 | 1 | 0 | 0 | 1 | 14 |
| Early hyperoxemia is r         | PRO | OR | 31039393 | CM | JP | 2 | 1 | 1 | 1 | 1 | 2 | 0 | 1 | 0 | 2 | 1 | 0 | 0 | 1 | 13 |
| Early Lactate Values A         | PRO | OR | 29608551 | CM | CC | 2 | 1 | 1 | 1 | 1 | 2 | 0 | 1 | 0 | 0 | 1 | 0 | 0 | 1 | 11 |
| Early Lactate Values A         | PRO | OR | 29608551 | CM | CM | 2 | 1 | 1 | 1 | 1 | 2 | 0 | 1 | 0 | 0 | 1 | 0 | 0 | 1 | 11 |
| Early prognostication          | PRO | OR | 31623658 | CM | SZ | 2 | 1 | 1 | 1 | 1 | 2 | 1 | 1 | 0 | 2 | 1 | 0 | 0 | 1 | 14 |
| Early recurrent arrhyth        | PRO | OR | 31185259 | CM | CC | 2 | 1 | 1 | 1 | 1 | 2 | 1 | 1 | 0 | 2 | 1 | 0 | 0 | 1 | 14 |
| Early-SEPs' amplitude          | PRO | OR | 30230524 | CM | JP | 2 | 1 | 1 | 1 | 1 | 2 | 1 | 1 | 0 | 2 | 1 | 2 | 0 | 1 | 16 |
| EEG based outcome pr           | PRO | OR | 31322793 | CM | CC | 2 | 1 | 1 | 1 | 1 | 2 | 1 | 1 | 2 | 2 | 1 | 0 | 0 | 1 | 16 |
| Effects of cholesterol l       | PRO | OR | 31571440 | CM | CC | 2 | 1 | 1 | 1 | 1 | 2 | 0 | 1 | 0 | 0 | 1 | 0 | 0 | 0 | 10 |
| Effects of cholesterol l       | PRO | OR | 31571440 | CM | CM | 2 | 1 | 1 | 1 | 0 | 2 | 1 | 1 | 0 | 0 | 1 | 0 | 0 | 0 | 10 |
| Electroencephalographi         | PRO | OR | 31124174 | SW | CM | 3 | 1 | 1 | 1 | 1 | 2 | 1 | 1 | 2 | 2 | 1 | 2 | 0 | 1 | 19 |
| Electroencephalographi         | PRO | OR | 31124174 | CM | TK | 2 | 1 | 1 | 1 | 1 | 2 | 1 | 1 | 0 | 2 | 1 | 2 | 0 | 1 | 16 |
| Electroencephalographi         | PRO | OR | 31124174 | CM | CM | 2 | 1 | 1 | 1 | 1 | 2 | 1 | 1 | 0 | 2 | 1 | 2 | 0 | 1 | 16 |
| Electroencephalographi         | PRO | OR | 31136808 | SW | CM | 2 | 1 | 1 | 1 | 0 | 2 | 1 | 1 | 0 | 2 | 1 | 0 | 0 | 1 | 13 |
| Electromyographic rea          | PRO | OR | 30885825 | CM | TK | 2 | 1 | 1 | 1 | 1 | 2 | 0 | 1 | 0 | 2 | 1 | 2 | 0 | 1 | 15 |
| Electromyographic rea          | PRO | OR | 30885825 | CM | SZ | 2 | 1 | 1 | 1 | 0 | 2 | 0 | 1 | 0 | 2 | 1 | 2 | 0 | 1 | 14 |
| End tidal CO(2) and $\alpha$   | PRO | OR | 30978377 | CM | SZ | 2 | 1 | 1 | 1 | 1 | 2 | 1 | 0 | 0 | 2 | 1 | 0 | 0 | 1 | 13 |
| Endoplasmic reticular          | PRO | OR | 31065605 | SW | CM | 3 | 1 | 1 | 1 | 1 | 2 | 0 | 1 | 0 | 2 | 1 | 0 | 0 | 1 | 14 |
| Evaluation of recurrent        | PRO | OR | 30478809 | CM | JP | 2 | 1 | 1 | 1 | 1 | 2 | 1 | 1 | 0 | 2 | 1 | 0 | 0 | 1 | 14 |
| Evoked potentials imp          | PRO | OR | 30995538 | CM | TK | 2 | 1 | 1 | 1 | 1 | 2 | 1 | 1 | 2 | 2 | 1 | 2 | 0 | 1 | 18 |

|                                   |     |    |          |    |    |   |   |   |   |   |   |   |   |   |   |   |   |   |   |    |
|-----------------------------------|-----|----|----------|----|----|---|---|---|---|---|---|---|---|---|---|---|---|---|---|----|
| External validation of            | PRO | OR | 31153943 | CM | SZ | 2 | 1 | 1 | 1 | 1 | 2 | 1 | 1 | 0 | 2 | 1 | 2 | 0 | 1 | 16 |
| Factors associated with           | PRO | OR | 30033165 | CM | SW | 2 | 1 | 1 | 1 | 1 | 2 | 1 | 1 | 0 | 2 | 1 | 0 | 0 | 1 | 14 |
| Frailty and associated            | PRO | OR | 31785373 | CM | TK | 2 | 1 | 1 | 1 | 1 | 2 | 0 | 1 | 0 | 2 | 1 | 2 | 0 | 1 | 15 |
| Frailty and associated            | PRO | OR | 31785373 | CM | CM | 2 | 1 | 1 | 1 | 1 | 2 | 0 | 1 | 0 | 2 | 1 | 2 | 0 | 1 | 15 |
| Frailty is associated with        | PRO | OR | 30411470 | CM | CC | 2 | 1 | 1 | 1 | 1 | 2 | 1 | 1 | 0 | 2 | 1 | 2 | 0 | 1 | 16 |
| Frailty is associated with        | PRO | OR | 30411470 | CM | CM | 2 | 1 | 1 | 1 | 1 | 2 | 1 | 1 | 0 | 2 | 1 | 2 | 0 | 1 | 16 |
| Gender differences in c           | PRO | OR | 31664859 | CM | SZ | 2 | 1 | 1 | 1 | 1 | 2 | 1 | 1 | 0 | 0 | 1 | 0 | 0 | 1 | 12 |
| Glycated Hemoglobin               | Pro | OR | 31187435 | CM | JP | 2 | 1 | 1 | 1 | 1 | 2 | 0 | 1 | 0 | 2 | 1 | 0 | 0 | 1 | 13 |
| Grey-white matter ratio           | PRO | OR | 30953628 | CM | JP | 2 | 1 | 1 | 1 | 1 | 2 | 1 | 1 | 0 | 2 | 1 | 0 | 0 | 0 | 13 |
| Growth differentiation            | PRO | OR | 31624933 | CM | SZ | 3 | 1 | 1 | 1 | 1 | 2 | 1 | 1 | 0 | 2 | 1 | 0 | 0 | 1 | 15 |
| How do information systems        | PRO | OR | 31199943 | CM | TK | 2 | 1 | 1 | 1 | 1 | 0 | 0 | 1 | 2 | 2 | 1 | 2 | 0 | 0 | 14 |
| Hypothermia outcome               | PRO | OR | 30940473 | CM | CC | 2 | 1 | 1 | 1 | 1 | 0 | 0 | 1 | 0 | 2 | 1 | 2 | 0 | 1 | 13 |
| Hypoxic liver injury at           | PRO | OR | 30831218 | CM | CM | 2 | 1 | 1 | 1 | 1 | 2 | 1 | 1 | 0 | 2 | 1 | 0 | 0 | 1 | 14 |
| Identifying out-of-hospital       | PRO | OR | 31711916 | CM | TK | 2 | 1 | 1 | 1 | 1 | 2 | 1 | 1 | 0 | 2 | 1 | 2 | 0 | 1 | 16 |
| Identifying out-of-hospital       | PRO | OR | 31711916 | CM | CM | 2 | 1 | 1 | 1 | 1 | 2 | 1 | 1 | 0 | 2 | 1 | 2 | 0 | 1 | 16 |
| Impact of age on survival         | PRO | OR | 31622019 | CM | SZ | 2 | 1 | 1 | 1 | 0 | 2 | 1 | 1 | 0 | 0 | 1 | 0 | 0 | 0 | 10 |
| Impact of hypothermia             | PRO | OR | 31238037 | CM | SC | 3 | 1 | 1 | 1 | 1 | 2 | 1 | 1 | 2 | 2 | 1 | 0 | 0 | 1 | 17 |
| Impact of rapid lactate           | PRO | OR | 30934011 | CM | TK | 2 | 1 | 1 | 1 | 1 | 2 | 1 | 1 | 0 | 2 | 1 | 2 | 0 | 1 | 16 |
| Impact of transitory renal        | PRO | OR | 31252641 | CM | CC | 2 | 1 | 1 | 1 | 1 | 2 | 0 | 1 | 0 | 0 | 1 | 2 | 0 | 0 | 12 |
| Implications of Initial           | PRO | OR | 31279406 | CM | JP | 2 | 1 | 1 | 1 | 1 | 2 | 1 | 1 | 0 | 2 | 1 | 2 | 0 | 1 | 16 |
| Implications of Neurological      | PRO | OR | 31320013 | CM | JP | 2 | 1 | 1 | 1 | 1 | 2 | 0 | 1 | 2 | 2 | 1 | 2 | 2 | 1 | 19 |
| Incidence and Prognosis           | PRO | OR | 30343292 | CM | JP | 2 | 1 | 1 | 1 | 1 | 2 | 1 | 1 | 0 | 2 | 1 | 0 | 0 | 1 | 14 |
| Incorporating baseline            | PRO | OR | 31310844 | CM | CC | 2 | 1 | 1 | 1 | 1 | 2 | 1 | 1 | 0 | 2 | 1 | 2 | 0 | 1 | 16 |
| Increased Citrullinated           | PRO | OR | 31581493 | CM | SW | 3 | 1 | 1 | 1 | 1 | 2 | 1 | 1 | 0 | 2 | 1 | 0 | 0 | 1 | 15 |
| Increased Glucose Variability     | PRO | OR | 31161969 | CM | JP | 2 | 1 | 1 | 1 | 1 | 2 | 1 | 1 | 0 | 2 | 1 | 0 | 0 | 1 | 14 |
| Influence of comorbidities        | PRO | OR | 31606397 | CM | CM | 2 | 1 | 1 | 1 | 0 | 2 | 0 | 1 | 2 | 2 | 1 | 0 | 0 | 0 | 13 |
| Influence of comorbidities        | PRO | OR | 31606397 | CM | TK | 2 | 1 | 1 | 1 | 0 | 2 | 0 | 1 | 0 | 2 | 1 | 0 | 0 | 0 | 11 |
| Initial arterial pH as a          | PRO | OR | 30946922 | CM | TK | 2 | 1 | 1 | 1 | 1 | 2 | 1 | 1 | 0 | 2 | 1 | 2 | 0 | 1 | 16 |
| Initial end-tidal carbon          | PRO | OR | 30985538 | CM | JP | 2 | 1 | 1 | 1 | 1 | 2 | 0 | 1 | 0 | 2 | 1 | 2 | 0 | 1 | 15 |
| Initial serum cholesterol         | PRO | OR | 31711917 | CM | CC | 2 | 1 | 1 | 1 | 1 | 2 | 1 | 1 | 0 | 0 | 1 | 2 | 0 | 1 | 14 |
| Initial serum cholesterol         | PRO | OR | 31711917 | CM | CM | 2 | 1 | 1 | 1 | 1 | 2 | 1 | 1 | 0 | 0 | 1 | 2 | 0 | 1 | 14 |
| Inter-predictability of           | PRO | OR | 31259107 | CM | TK | 2 | 1 | 0 | 1 | 0 | 2 | 1 | 1 | 0 | 2 | 0 | 2 | 0 | 0 | 12 |
| Ion shift index as a predictor    | PRO | OR | 30807816 | CM | SZ | 2 | 1 | 1 | 1 | 1 | 2 | 1 | 1 | 0 | 2 | 1 | 2 | 0 | 1 | 16 |
| Ion shift index as a predictor    | PRO | OR | 30807816 | CM | SW | 2 | 1 | 1 | 1 | 1 | 2 | 1 | 1 | 0 | 2 | 1 | 2 | 0 | 1 | 16 |
| Lactate Clearance Predictor       | PRO | OR | 30889788 | SW | CM | 2 | 1 | 1 | 1 | 1 | 2 | 1 | 1 | 0 | 2 | 1 | 2 | 0 | 1 | 16 |
| Late Awakening in Survivors       | PRO | OR | 30303838 | CM | CC | 2 | 1 | 1 | 1 | 1 | 2 | 1 | 1 | 0 | 2 | 1 | 2 | 2 | 1 | 18 |
| Late Awakening in Survivors       | PRO | OR | 30303838 | CM | CM | 2 | 1 | 1 | 1 | 1 | 2 | 1 | 1 | 0 | 2 | 1 | 2 | 0 | 1 | 16 |
| Lipidomics Detection              | PRO | OR | 30855329 | CM | CC | 2 | 1 | 1 | 1 | 1 | 2 | 1 | 1 | 0 | 2 | 1 | 0 | 0 | 1 | 14 |
| Long term clinical outcomes       | PRO | OR | 31859025 | CM | JP | 2 | 1 | 1 | 1 | 1 | 2 | 0 | 1 | 0 | 2 | 1 | 0 | 0 | 0 | 12 |
| Long term renal recovery          | PRO | OR | 31271728 | SW | CM | 2 | 1 | 1 | 1 | 1 | 2 | 0 | 1 | 0 | 2 | 1 | 0 | 0 | 1 | 13 |
| Long-Term Outcomes                | PRO | OR | 30060961 | CM | TK | 2 | 1 | 1 | 1 | 1 | 2 | 1 | 1 | 0 | 2 | 1 | 2 | 0 | 1 | 16 |
| Long-Term Outcomes                | PRO | OR | 30060961 | CM | CM | 2 | 1 | 1 | 1 | 1 | 2 | 1 | 1 | 0 | 2 | 1 | 2 | 0 | 1 | 16 |
| Long-Term Survival Analysis       | PRO | OR | 31262547 | CM | CC | 2 | 1 | 1 | 1 | 1 | 2 | 0 | 1 | 0 | 2 | 1 | 2 | 0 | 1 | 15 |
| Long-Term Survival Analysis       | PRO | OR | 31262547 | CM | CM | 2 | 1 | 1 | 1 | 1 | 2 | 0 | 1 | 0 | 2 | 1 | 0 | 0 | 1 | 13 |
| Long-term Survival analysis       | PRO | OR | 31065204 | CM | SZ | 2 | 1 | 1 | 1 | 1 | 2 | 0 | 1 | 0 | 2 | 1 | 2 | 0 | 1 | 15 |
| Long-term survival in patients    | PRO | OR | 30603662 | CM | JP | 2 | 1 | 1 | 1 | 1 | 2 | 1 | 1 | 0 | 2 | 1 | 0 | 0 | 1 | 14 |
| Markers of cardiogenic shock      | PRO | OR | 30470603 | CM | CM | 2 | 1 | 1 | 1 | 1 | 2 | 1 | 1 | 0 | 0 | 1 | 0 | 0 | 1 | 12 |
| Markers of cardiogenic shock      | PRO | OR | 30470603 | CM | CC | 2 | 1 | 1 | 1 | 1 | 2 | 1 | 1 | 0 | 0 | 1 | 0 | 0 | 0 | 11 |
| Mean arterial pressure            | PRO | OR | 30586655 | CM | SZ | 2 | 1 | 1 | 1 | 1 | 2 | 1 | 1 | 2 | 2 | 1 | 2 | 0 | 1 | 18 |
| Mild hypothermia impact           | PRO | OR | 31428461 | CM | TK | 3 | 1 | 1 | 0 | 0 | 2 | 1 | 1 | 0 | 2 | 1 | 0 | 0 | 1 | 13 |
| Moderate brain hypothermia        | PRO | OR | 30679007 | SW | CM | 4 | 1 | 1 | 1 | 1 | 2 | 1 | 1 | 0 | 2 | 1 | 0 | 0 | 1 | 16 |
| Modulating effects of hypothermia | PRO | OR | 31422106 | SW | CM | 2 | 1 | 1 | 1 | 1 | 2 | 1 | 1 | 0 | 2 | 1 | 0 | 0 | 1 | 14 |
| Multimodal approach to            | PRO | OR | 30562594 | CM | JP | 2 | 1 | 1 | 1 | 1 | 2 | 1 | 1 | 0 | 2 | 1 | 0 | 0 | 1 | 14 |

|                         |     |    |          |    |    |   |   |   |   |   |   |   |   |   |   |   |   |   |   |    |
|-------------------------|-----|----|----------|----|----|---|---|---|---|---|---|---|---|---|---|---|---|---|---|----|
| Neurological outcome    | PRO | OR | 31300383 | CM | CC | 2 | 1 | 1 | 1 | 1 | 2 | 0 | 1 | 2 | 2 | 1 | 2 | 0 | 1 | 17 |
| Neurological pupil ind  | PRO | OR | 31069659 | CM | CC | 2 | 1 | 1 | 0 | 1 | 2 | 1 | 1 | 2 | 2 | 1 | 0 | 0 | 1 | 15 |
| Neurological Pupil ind  | PRO | OR | 31870911 | CM | TK | 3 | 1 | 1 | 1 | 1 | 2 | 1 | 1 | 0 | 2 | 1 | 0 | 0 | 1 | 15 |
| Neurological Pupil ind  | PRO | OR | 31870911 | CM | CM | 3 | 1 | 1 | 1 | 1 | 2 | 1 | 1 | 0 | 2 | 1 | 0 | 0 | 1 | 15 |
| Neuron-specific enolase | PRO | OR | 31306716 | CM | JP | 2 | 1 | 1 | 1 | 1 | 2 | 1 | 1 | 0 | 2 | 1 | 2 | 0 | 1 | 16 |
| Neuron-specific enolase | PRO | OR | 30857978 | CM | TK | 2 | 1 | 1 | 1 | 1 | 2 | 0 | 1 | 0 | 2 | 1 | 2 | 0 | 1 | 15 |
| Neurophysiological an   | PRO | OR | 31763408 | CM | SW | 2 | 0 | 1 | 1 | 1 | 2 | 1 | 1 | 0 | 2 | 1 | 2 | 0 | 1 | 15 |
| Neurophysiology and i   | PRO | OR | 31400398 | CM | CC | 2 | 1 | 1 | 1 | 1 | 2 | 1 | 1 | 2 | 2 | 1 | 2 | 0 | 1 | 18 |
| Neurophysiology for p   | PRO | OR | 31790754 | CM | SZ | 2 | 1 | 1 | 1 | 1 | 2 | 1 | 1 | 0 | 2 | 1 | 2 | 0 | 1 | 16 |
| Neuroprognostication l  | PRO | OR | 31743225 | CM | JP | 1 | 1 | 1 | 1 | 1 | 2 | 1 | 1 | 2 | 2 | 1 | 0 | 0 | 1 | 15 |
| Neutrophil-lymphocyt    | PRO | OR | 30815378 | CM | JP | 2 | 1 | 1 | 1 | 1 | 2 | 1 | 1 | 0 | 2 | 1 | 2 | 0 | 1 | 16 |
| Number of Circulating   | PRO | OR | 31237169 | CM | TK | 3 | 1 | 1 | 1 | 1 | 2 | 1 | 1 | 2 | 2 | 1 | 0 | 0 | 1 | 17 |
| Obesity is associated v | PRO | OR | 31526656 | CM | SZ | 2 | 1 | 1 | 1 | 1 | 2 | 1 | 1 | 0 | 2 | 1 | 0 | 0 | 1 | 14 |
| On-the-Scene Hyaluror   | PRO | OR | 31148947 | CM | TK | 3 | 1 | 1 | 1 | 1 | 2 | 1 | 1 | 0 | 2 | 1 | 0 | 0 | 1 | 15 |
| One-year outcome of p   | PRO | OR | 31678408 | CM | SZ | 2 | 1 | 1 | 1 | 1 | 2 | 0 | 1 | 2 | 2 | 1 | 0 | 0 | 0 | 14 |
| Optimal Hemodynami      | PRO | OR | 31633449 | CM | CC | 2 | 1 | 1 | 1 | 1 | 2 | 1 | 1 | 0 | 0 | 1 | 2 | 0 | 1 | 14 |
| Optimal Hemodynami      | PRO | OR | 31633449 | CM | CM | 2 | 1 | 1 | 1 | 1 | 2 | 1 | 1 | 0 | 0 | 1 | 2 | 0 | 1 | 14 |
| Optimal timing to me    | PRO | OR | 31306717 | CM | SZ | 2 | 1 | 1 | 1 | 1 | 2 | 1 | 1 | 0 | 2 | 1 | 0 | 0 | 1 | 14 |
| Out of hospital cardiac | PRO | OR | 31423870 | CM | CC | 2 | 1 | 1 | 1 | 1 | 2 | 1 | 1 | 0 | 0 | 1 | 0 | 0 | 0 | 11 |
| Outcome after type A :  | PRO | OR | 31505231 | CM | TK | 2 | 1 | 1 | 1 | 1 | 0 | 0 | 1 | 0 | 2 | 1 | 2 | 0 | 1 | 13 |
| Outcome after type A :  | PRO | OR | 31505231 | CM | CM | 2 | 1 | 1 | 1 | 0 | 0 | 0 | 1 | 0 | 2 | 1 | 2 | 0 | 0 | 11 |
| Outcome prediction of   | PRO | OR | 31220514 | SW | CM | 2 | 1 | 1 | 1 | 1 | 2 | 0 | 1 | 0 | 2 | 1 | 0 | 0 | 1 | 13 |
| Outcome predictors of   | PRO | OR | 31714000 | CM | SW | 2 | 1 | 1 | 1 | 1 | 2 | 0 | 1 | 0 | 2 | 1 | 0 | 0 | 1 | 13 |
| Outcome, quality of li  | PRO | OR | 31771619 | CM | CC | 2 | 1 | 1 | 1 | 1 | 2 | 1 | 1 | 0 | 2 | 1 | 0 | 0 | 1 | 14 |
| Outcome, quality of li  | PRO | OR | 31771619 | CM | CM | 2 | 1 | 1 | 1 | 1 | 2 | 1 | 1 | 0 | 2 | 1 | 0 | 0 | 1 | 14 |
| Outcomes after out-of-  | PRO | OR | 31988770 | CM | TK | 2 | 1 | 1 | 1 | 1 | 2 | 1 | 1 | 0 | 2 | 1 | 2 | 0 | 1 | 16 |
| Outcomes after out-of-  | PRO | OR | 31988770 | CM | CM | 2 | 1 | 1 | 1 | 1 | 2 | 1 | 1 | 0 | 2 | 1 | 2 | 0 | 1 | 16 |
| Outcomes of survivors   | PRO | OR | 30455410 | CM | SZ | 2 | 1 | 1 | 1 | 1 | 2 | 0 | 1 | 0 | 0 | 1 | 0 | 0 | 0 | 10 |
| Oximetry-Guided nom     | PRO | OR | 31063840 | CM | SZ | 4 | 1 | 1 | 1 | 0 | 2 | 1 | 1 | 0 | 2 | 1 | 2 | 0 | 1 | 17 |
| Performance of clinical | PRO | OR | 30391369 | CM | CM | 2 | 1 | 1 | 1 | 1 | 2 | 1 | 1 | 2 | 2 | 1 | 2 | 0 | 1 | 18 |
| Performance of clinical | PRO | OR | 30391369 | CM | CC | 2 | 1 | 1 | 1 | 1 | 2 | 1 | 1 | 0 | 0 | 1 | 2 | 0 | 1 | 14 |
| Plasma Adenylate Lev    | PRO | OR | 30052576 | CM | JP | 2 | 1 | 1 | 1 | 1 | 2 | 1 | 1 | 0 | 2 | 1 | 0 | 0 | 1 | 14 |
| Post resuscitation prog | PRO | OR | 30391368 | CM | JP | 2 | 1 | 1 | 1 | 1 | 2 | 0 | 1 | 0 | 2 | 1 | 0 | 0 | 1 | 13 |
| Prearrest prediction of | PRO | OR | 31412292 | CM | TK | 2 | 1 | 1 | 1 | 1 | 2 | 1 | 1 | 0 | 2 | 1 | 0 | 0 | 1 | 14 |
| Predicting Outcome A    | PRO | OR | 31466497 | CM | SZ | 2 | 1 | 1 | 1 | 1 | 2 | 0 | 1 | 2 | 2 | 1 | 2 | 0 | 1 | 17 |
| Predicting Outcomes c   | PRO | OR | 31512185 | CM | SZ | 2 | 1 | 1 | 1 | 1 | 2 | 1 | 1 | 0 | 2 | 1 | 2 | 0 | 1 | 16 |
| Predicting survival in  | PRO | OR | 30994183 | CM | SZ | 2 | 1 | 1 | 1 | 0 | 2 | 0 | 1 | 0 | 2 | 1 | 2 | 0 | 1 | 14 |
| Predicting the probabil | PRO | OR | 31821836 | CM | CM | 2 | 1 | 1 | 1 | 1 | 2 | 0 | 1 | 0 | 2 | 1 | 2 | 0 | 1 | 15 |
| Predicting the probabil | PRO | OR | 31821836 | CM | TK | 2 | 1 | 1 | 1 | 1 | 2 | 0 | 1 | 0 | 2 | 1 | 2 | 0 | 0 | 14 |
| Prediction of good neu  | PRO | OR | 31362082 | SW | CM | 2 | 1 | 1 | 1 | 1 | 2 | 1 | 1 | 0 | 2 | 1 | 0 | 0 | 1 | 14 |
| Predictive performance  | PRO | OR | 31441881 | CM | JP | 3 | 1 | 1 | 1 | 1 | 2 | 1 | 1 | 0 | 2 | 1 | 0 | 0 | 1 | 15 |
| Predictors and their pr | PRO | OR | 31628390 | CM | SW | 2 | 1 | 1 | 1 | 1 | 2 | 1 | 1 | 0 | 2 | 1 | 0 | 0 | 1 | 14 |
| Predictors of Neurolog  | PRO | OR | 31932021 | CM | JP | 2 | 1 | 1 | 1 | 1 | 2 | 0 | 1 | 0 | 2 | 1 | 0 | 0 | 1 | 13 |
| Presepsin As a Bioma    | PRO | OR | 30985453 | CM | SZ | 2 | 1 | 1 | 1 | 0 | 2 | 1 | 1 | 0 | 2 | 1 | 0 | 0 | 1 | 13 |
| Prognostic Factors for  | PRO | OR | 31932022 | CM | SW | 2 | 1 | 1 | 1 | 1 | 2 | 0 | 1 | 0 | 2 | 1 | 2 | 0 | 1 | 15 |
| Prognostic impact of c  | PRO | OR | 30578436 | CM | JP | 2 | 1 | 1 | 1 | 1 | 2 | 0 | 1 | 0 | 2 | 1 | 0 | 0 | 1 | 13 |
| Prognostic impact of t  | PRO | OR | 31063844 | CM | CC | 2 | 1 | 1 | 1 | 1 | 2 | 1 | 1 | 0 | 0 | 1 | 2 | 0 | 1 | 14 |
| Prognostic performanc   | PRO | OR | 30797049 | CM | JP | 2 | 1 | 1 | 1 | 1 | 2 | 1 | 1 | 0 | 2 | 1 | 2 | 0 | 1 | 16 |
| Prognostic performanc   | PRO | OR | 30797049 | CM | SW | 2 | 1 | 1 | 1 | 1 | 2 | 1 | 1 | 0 | 2 | 1 | 2 | 0 | 1 | 16 |
| Prognostic value of bl  | PRO | OR | 31648431 | CM | SZ | 2 | 0 | 1 | 0 | 0 | 2 | 1 | 0 | 0 | 0 | 1 | 2 | 0 | 1 | 10 |
| Prognostic Value of B   | PRO | OR | 31276111 | CM | JP | 2 | 1 | 1 | 1 | 1 | 2 | 1 | 1 | 0 | 2 | 1 | 2 | 0 | 1 | 16 |
| Prognostic Value of bl  | PRO | OR | 31276111 | CM | JP | 2 | 1 | 1 | 1 | 1 | 2 | 1 | 1 | 0 | 2 | 1 | 2 | 0 | 1 | 16 |
| Prognostic value of ph  | PRO | OR | 31153942 | CM | JP | 2 | 1 | 1 | 1 | 1 | 2 | 1 | 1 | 0 | 2 | 1 | 0 | 0 | 1 | 14 |



|                                     |     |    |          |    |    |   |   |   |   |   |   |   |   |   |   |   |   |   |   |    |
|-------------------------------------|-----|----|----------|----|----|---|---|---|---|---|---|---|---|---|---|---|---|---|---|----|
| Prognostic Value of S               | PRO | OR | 31565439 | CM | TK | 3 | 1 | 1 | 1 | 1 | 2 | 1 | 1 | 0 | 2 | 1 | 0 | 0 | 1 | 15 |
| Prognostic Value of S               | PRO | OR | 31565439 | CM | CM | 2 | 1 | 1 | 1 | 0 | 2 | 1 | 1 | 0 | 2 | 1 | 0 | 0 | 1 | 13 |
| Prognostic Value of th              | PRO | OR | 31075958 | CM | TK | 2 | 1 | 1 | 1 | 1 | 2 | 0 | 1 | 0 | 2 | 1 | 2 | 0 | 1 | 15 |
| Prognostication after c             | PRO | OR | 30902688 | CM | JP | 1 | 1 | 1 | 1 | 1 | 2 | 0 | 1 | 2 | 0 | 1 | 0 | 0 | 1 | 12 |
| Prognostication via ea              | PRO | OR | 31521958 | CM | jp | 2 | 1 | 1 | 1 | 1 | 2 | 0 | 1 | 0 | 2 | 1 | 0 | 0 | 1 | 13 |
| Prospective validation              | PRO | OR | 31078496 | CM | TK | 2 | 1 | 1 | 1 | 1 | 2 | 1 | 1 | 0 | 2 | 1 | 2 | 0 | 0 | 15 |
| Pulseless electrical acti           | PRO | OR | 31147183 | CM | CC | 2 | 1 | 1 | 0 | 1 | 2 | 0 | 1 | 0 | 0 | 1 | 2 | 0 | 1 | 12 |
| Quantitative EEG react              | PRO | OR | 31419742 | CM | SZ | 2 | 1 | 1 | 1 | 1 | 2 | 1 | 1 | 2 | 2 | 1 | 0 | 0 | 1 | 16 |
| Quantitative Electroen              | PRO | OR | 31241498 | CM | CM | 2 | 1 | 1 | 1 | 1 | 2 | 1 | 1 | 2 | 2 | 1 | 0 | 0 | 1 | 16 |
| Quantitative Electroen              | PRO | OR | 31241498 | CM | CC | 2 | 1 | 1 | 1 | 1 | 2 | 1 | 1 | 0 | 2 | 1 | 0 | 0 | 1 | 14 |
| Reasons for death in p              | PRO | OR | 30710595 | CM | CC | 2 | 1 | 1 | 1 | 1 | 2 | 0 | 1 | 2 | 2 | 1 | 0 | 0 | 1 | 15 |
| Recovery from acute k               | PRO | OR | 31307504 | SW | CM | 2 | 1 | 1 | 1 | 1 | 2 | 1 | 1 | 0 | 2 | 1 | 0 | 0 | 1 | 14 |
| Reexamination of the l              | PRO | OR | 31150083 | SW | CM | 2 | 1 | 1 | 1 | 1 | 2 | 1 | 1 | 2 | 2 | 1 | 2 | 2 | 1 | 20 |
| Relation of Chronic T               | PRO | OR | 30967290 | CM | TK | 2 | 1 | 1 | 1 | 1 | 2 | 1 | 1 | 0 | 2 | 1 | 0 | 0 | 1 | 14 |
| Relation of Chronic T               | PRO | OR | 30967290 | CM | TK | 2 | 1 | 1 | 1 | 1 | 2 | 1 | 1 | 0 | 2 | 1 | 0 | 0 | 1 | 14 |
| Relation of Chronic T               | PRO | OR | 30967290 | CM | CM | 2 | 1 | 1 | 1 | 1 | 2 | 1 | 1 | 0 | 2 | 1 | 0 | 0 | 0 | 13 |
| Relationship Between                | PRO | OR | 31821187 | CM | CC | 2 | 1 | 1 | 0 | 1 | 2 | 1 | 1 | 2 | 2 | 1 | 2 | 0 | 1 | 17 |
| Relationship Between                | PRO | OR | 31821187 | CM | CM | 2 | 1 | 1 | 0 | 1 | 2 | 1 | 1 | 2 | 2 | 1 | 2 | 0 | 1 | 17 |
| Relationship between c              | PRO | OR | 31628979 | CM | SW | 2 | 1 | 1 | 1 | 1 | 2 | 1 | 1 | 0 | 2 | 1 | 0 | 0 | 1 | 14 |
| Relationship Between                | PRO | OR | 30851940 | CM | SZ | 2 | 1 | 1 | 1 | 1 | 2 | 0 | 1 | 0 | 0 | 1 | 0 | 0 | 1 | 11 |
| Relative tachycardia is             | PRO | OR | 29936012 | CM | SZ | 2 | 1 | 1 | 1 | 1 | 2 | 1 | 1 | 0 | 2 | 1 | 0 | 0 | 1 | 14 |
| Resistin - Can it be a              | PRO | OR | 30650128 | CM | TK | 3 | 1 | 1 | 1 | 1 | 2 | 1 | 0 | 0 | 2 | 1 | 2 | 0 | 1 | 16 |
| Resistin - Can it be a              | PRO | OR | 30650128 | CM | CM | 3 | 1 | 1 | 1 | 1 | 2 | 1 | 1 | 0 | 2 | 1 | 0 | 0 | 1 | 15 |
| Resistin - Can it be a              | PRO | OR | 30650128 | CM | CC | 3 | 1 | 1 | 1 | 0 | 2 | 1 | 1 | 0 | 2 | 1 | 0 | 0 | 1 | 14 |
| Risk factors for progre             | PRO | OR | 30963296 | CM | CC | 2 | 1 | 1 | 1 | 1 | 2 | 1 | 1 | 0 | 2 | 1 | 2 | 0 | 1 | 16 |
| Serum neurofilament l               | PRO | OR | 31375414 | CM | JP | 2 | 1 | 1 | 1 | 1 | 2 | 1 | 1 | 0 | 2 | 1 | 0 | 0 | 1 | 14 |
| Serum Neurofilament l               | PRO | OR | 30383090 | CM | CM | 3 | 1 | 1 | 1 | 1 | 2 | 1 | 1 | 2 | 2 | 1 | 2 | 0 | 1 | 19 |
| Serum Neurofilament l               | PRO | OR | 30383090 | CM | CC | 2 | 1 | 1 | 1 | 1 | 2 | 1 | 1 | 2 | 2 | 1 | 2 | 0 | 1 | 18 |
| Serum potassium level               | PRO | OR | 31081678 | SW | CM | 2 | 1 | 1 | 1 | 1 | 2 | 0 | 1 | 0 | 2 | 1 | 2 | 0 | 1 | 15 |
| Serum tau fragments a               | PRO | OR | 31017476 | CM | CC | 3 | 1 | 1 | 1 | 1 | 2 | 1 | 1 | 2 | 2 | 1 | 0 | 0 | 1 | 17 |
| Sources of interrater v             | PRO | OR | 30847430 | CM | TK | 2 | 1 | 1 | 1 | 0 | 0 | 0 | 1 | 0 | 2 | 1 | 0 | 0 | 1 | 10 |
| Spectral Content of El              | PRO | OR | 30422916 | CM | JP | 2 | 1 | 1 | 1 | 1 | 2 | 0 | 1 | 0 | 2 | 1 | 0 | 0 | 1 | 13 |
| The association betwe               | PRO | OR | 31626864 | CM | TK | 2 | 1 | 1 | 1 | 1 | 2 | 0 | 1 | 0 | 2 | 1 | 0 | 0 | 1 | 13 |
| The association betwe               | PRO | OR | 31626864 | CM | CM | 2 | 1 | 1 | 1 | 1 | 2 | 0 | 1 | 0 | 2 | 1 | 0 | 0 | 1 | 13 |
| The association betwe               | PRO | OR | 30015516 | CM | TK | 3 | 1 | 1 | 1 | 1 | 2 | 1 | 1 | 0 | 2 | 1 | 0 | 0 | 0 | 14 |
| The association betwe               | PRO | OR | 30015516 | CM | CM | 3 | 1 | 1 | 1 | 1 | 2 | 1 | 1 | 0 | 2 | 1 | 0 | 0 | 0 | 14 |
| The association of chr              | PRO | OR | 30794830 | SW | CM | 2 | 1 | 1 | 1 | 1 | 2 | 0 | 1 | 0 | 2 | 1 | 0 | 0 | 1 | 13 |
| The central role of CT              | PRO | OR | 31892623 | CM | CC | 1 | 0 | 0 | 1 | 0 | 0 | 1 | 1 | 0 | 0 | 1 | 0 | 0 | 1 | 6  |
| The central role of CT              | PRO | OR | 31892623 | CM | CM | 1 | 0 | 0 | 1 | 0 | 0 | 1 | 1 | 0 | 0 | 1 | 0 | 0 | 1 | 6  |
| The complement lectin               | PRO | OR | 31538810 | CM | SZ | 4 | 1 | 1 | 1 | 1 | 2 | 1 | 1 | 0 | 2 | 1 | 0 | 0 | 1 | 16 |
| The EXACT protocol:                 | PRO | OR | 31009695 | SW | CM | 4 | 1 | 1 | 0 | 0 | 2 | 1 | 1 | 0 | 2 | 1 | 0 | 0 | 0 | 13 |
| The gradient between                | PRO | OR | 29685358 | CM | JP | 2 | 1 | 1 | 1 | 1 | 2 | 0 | 1 | 0 | 2 | 1 | 0 | 0 | 1 | 13 |
| The prognostic signific             | PRO | OR | 30404678 | CM | CC | 2 | 1 | 1 | 1 | 1 | 2 | 1 | 1 | 0 | 0 | 1 | 2 | 0 | 0 | 13 |
| The prognostic signific             | PRO | OR | 30404678 | CM | CM | 2 | 1 | 1 | 1 | 1 | 2 | 1 | 1 | 0 | 0 | 1 | 0 | 0 | 0 | 11 |
| The Prognostic Useful               | PRO | OR | 31306348 | CM | TK | 2 | 1 | 1 | 1 | 1 | 2 | 0 | 1 | 0 | 2 | 1 | 2 | 0 | 1 | 15 |
| The Prognostic Value                | PRO | OR | 30112686 | CM | SW | 2 | 1 | 1 | 1 | 1 | 2 | 1 | 1 | 0 | 2 | 1 | 2 | 0 | 1 | 16 |
| The usefulness of neur              | PRO | OR | 31585184 | CM | TK | 3 | 1 | 1 | 1 | 1 | 2 | 0 | 1 | 0 | 2 | 1 | 2 | 0 | 1 | 16 |
| The usefulness of neur              | PRO | OR | 31585184 | CM | CM | 3 | 1 | 1 | 1 | 1 | 2 | 0 | 1 | 0 | 2 | 1 | 0 | 0 | 1 | 14 |
| Time course of platelet             | PRO | OR | 31132395 | CM | JP | 2 | 1 | 1 | 1 | 1 | 2 | 1 | 1 | 0 | 2 | 1 | 0 | 0 | 1 | 14 |
| Timing of brain comp                | PRO | OR | 31585185 | CM | SZ | 2 | 1 | 1 | 1 | 1 | 2 | 0 | 1 | 0 | 2 | 1 | 2 | 0 | 1 | 15 |
| Tissue-Specific Metab               | PRO | OR | 31475603 | CM | JP | 3 | 1 | 1 | 1 | 1 | 2 | 1 | 1 | 0 | 2 | 1 | 0 | 0 | 1 | 15 |
| Turn-to-Shockable Rh                | PRO | OR | 31411544 | CM | JP | 2 | 1 | 1 | 1 | 1 | 2 | 1 | 1 | 0 | 2 | 1 | 0 | 0 | 1 | 14 |
| Urine I <sup>2</sup> -2-Microglobul | PRO | OR | 31205786 | CM | SZ | 2 | 1 | 1 | 1 | 1 | 2 | 1 | 1 | 0 | 2 | 1 | 0 | 0 | 1 | 14 |

|                          |     |    |          |    |    |   |   |   |   |   |   |   |   |   |   |   |   |   |   |    |
|--------------------------|-----|----|----------|----|----|---|---|---|---|---|---|---|---|---|---|---|---|---|---|----|
| Usefulness of a quantit  | PRO | OR | 30831551 | CM | SZ | 2 | 1 | 1 | 1 | 1 | 2 | 0 | 1 | 0 | 2 | 1 | 0 | 0 | 1 | 13 |
| Usefulness of Intracran  | PRO | OR | 31526251 | CM | CC | 2 | 1 | 1 | 1 | 1 | 2 | 1 | 1 | 0 | 0 | 1 | 2 | 0 | 1 | 14 |
| Usefulness of Intracran  | PRO | OR | 31526251 | CM | CM | 2 | 1 | 1 | 1 | 1 | 2 | 1 | 1 | 0 | 0 | 1 | 2 | 0 | 1 | 14 |
| Usefulness of neuron s   | PRO | OR | 31022497 | SW | CM | 2 | 1 | 1 | 1 | 1 | 2 | 1 | 1 | 0 | 2 | 1 | 2 | 0 | 1 | 16 |
| Usefulness of Trends i   | PRO | OR | 31405547 | CM | TK | 2 | 1 | 1 | 1 | 1 | 2 | 0 | 1 | 0 | 2 | 1 | 2 | 0 | 1 | 15 |
| Validation of the retun  | PRO | OR | 30447262 | CM | SW | 2 | 1 | 1 | 1 | 1 | 2 | 0 | 1 | 0 | 2 | 1 | 2 | 0 | 1 | 15 |
| Value of assessment of   | PRO | OR | 30248375 | CM | SW | 2 | 1 | 1 | 1 | 1 | 2 | 1 | 1 | 0 | 2 | 1 | 0 | 0 | 1 | 14 |
| Value of capnography     | PRO | OR | 30836170 | CM | CC | 2 | 1 | 1 | 1 | 1 | 0 | 0 | 1 | 0 | 2 | 1 | 0 | 0 | 1 | 11 |
| Value of EEG reactivit   | PRO | OR | 31211949 | CM | JP | 2 | 1 | 1 | 1 | 1 | 2 | 1 | 1 | 0 | 2 | 1 | 2 | 0 | 0 | 15 |
| Ventricular Fibrillatior | PRO | OR | 30626208 | CM | SZ | 2 | 1 | 1 | 1 | 1 | 2 | 1 | 1 | 0 | 2 | 1 | 0 | 0 | 1 | 14 |
| Vitamin D Deficiency     | PRO | OR | 31524672 | CM | SZ | 2 | 1 | 1 | 1 | 1 | 2 | 1 | 1 | 0 | 2 | 1 | 2 | 0 | 1 | 16 |
