# Supplementary material for: Cardiac arrest: An interdisciplinary scoping review of the literature from 2019
Source: PubMed Central journal article supplement (PMC8244427; doi:10.1016/j.resplu.2020.100037), 2020-11-04
Supplement: mmc5.pdf [file mmc5.pdf]

| Article & Reviewer Information |                                            |                                             |           |                 |                   | Clarity (5 max) |   |   |   | Design (7 max) |   |   |   | Importance (5 max) |   |   | Impact (5 max) |   |   | Total score (22 max) |
|--------------------------------|--------------------------------------------|---------------------------------------------|-----------|-----------------|-------------------|-----------------|---|---|---|----------------|---|---|---|--------------------|---|---|----------------|---|---|----------------------|
| Citation Title                 | Category (EPH, PRE, IN, PRO, PED, BSP, GL) | Type: Original Research (OR) or Review (RE) | PubMed ID | Editor Initials | Reviewer Initials | A               | B | C | D | A              | B | C | D | A                  | B | C | A              | B | C |                      |
| Disseminated intravas          | BSP                                        | RE                                          | 31102491  | SG              | SC                | 2               | 1 | 1 | 1 | 0              | 0 | 0 | 1 | 2                  | 2 | 1 | 2              | 0 | 1 | 14                   |
| Sodium-Hydrogen Exc            | BSP                                        | RE                                          | 31067690  | SG              | SC                | 2               | 1 | 1 | 1 | 0              | 0 | 0 | 0 | 2                  | 2 | 1 | 2              | 2 | 1 | 15                   |
| Aspirin to Prevent Suc         | EPH                                        | RE                                          | 30296406  | MPB/MABC        | YE                | 2               | 1 | 1 | 1 | 0              | 0 | 0 | 0 | 2                  | 2 | 1 | 2              | 0 | 1 | 13                   |
| Atrial fibrillation and i      | EPH                                        | RE                                          | 31353765  | MPB/MABC        | EM                | 2               | 1 | 1 | 1 | 3              | 2 | 1 | 1 | 0                  | 2 | 1 | 2              | 0 | 1 | 18                   |
| Autoantibodies for Ca          | EPH                                        | RE                                          | 30009713  | MABC            | MABC              | 2               | 1 | 1 | 1 | 0              | 0 | 0 | 0 | 0                  | 0 | 0 | 2              | 2 | 1 | 10                   |
| Automated external de          | EPH                                        | RE                                          | 30594573  | MPB/MABC        | SB                | 2               | 1 | 1 | 1 | 0              | 0 | 0 | 0 | 0                  | 0 | 0 | 2              | 2 | 1 | 10                   |
| Bystander CPR trainin          | EPH                                        | RE                                          | 31533000  | MPB/MABC        | YE                | 2               | 1 | 1 | 1 | 3              | 2 | 1 | 1 | 2                  | 2 | 1 | 2              | 0 | 1 | 20                   |
| Can cardiac resynchronr        | EPH                                        | RE                                          | 31004607  | MPB/MABC        | MABC              | 2               | 1 | 0 | 0 | 0              | 0 | 0 | 0 | 0                  | 2 | 1 | 2              | 2 | 1 | 11                   |
| Canadian Cardiovascu           | EPH                                        | RE                                          | 31679625  | MPB/MABC        | SB                | 2               | 1 | 1 | 1 | 0              | 0 | 0 | 0 | 0                  | 2 | 1 | 2              | 2 | 1 | 13                   |
| Channelopathies That           | EPH                                        | RE                                          | 30389366  | MPB/MABC        | SB                | 2               | 1 | 1 | 1 | 0              | 0 | 0 | 0 | 0                  | 0 | 0 | 2              | 2 | 1 | 10                   |
| Current Device Therap          | EPH                                        | RE                                          | 30389367  | MPB/MABC        | EM                | 2               | 1 | 1 | 1 | 0              | 2 | 0 | 1 | 0                  | 2 | 1 | 2              | 0 | 1 | 14                   |
| Diagnostic Algorithms          | EPH                                        | RE                                          | 30471046  | MPB/MABC        | JW                | 2               | 1 | 1 | 1 | 0              | 2 | 1 | 1 | 2                  | 2 | 1 | 2              | 0 | 1 | 17                   |
| Disparities in Death R         | EPH                                        | RE                                          | 30594574  | MPB/MABC        | EM                | 2               | 1 | 1 | 1 | 3              | 2 | 1 | 1 | 0                  | 2 | 1 | 2              | 2 | 1 | 20                   |
| Do-not-intubate orders         | EPH                                        | RE                                          | 31659387  | MPB/MABC        | MPB               | 2               | 1 | 1 | 1 | 3              | 2 | 1 | 1 | 0                  | 2 | 1 | 0              | 0 | 1 | 16                   |
| Effect of smart devices        | EPH                                        | RE                                          | 31325556  | MPB/MABC        | SB                | 2               | 1 | 1 | 1 | 3              | 2 | 1 | 1 | 0                  | 2 | 1 | 2              | 0 | 1 | 18                   |
| Effectiveness of the 20        | EPH                                        | RE                                          | 30366935  | MABC            | MABC              | 2               | 1 | 1 | 1 | 3              | 2 | 1 | 1 | 2                  | 2 | 1 | 2              | 2 | 1 | 22                   |
| Epidemiology of Sudd           | EPH                                        | RE                                          | 30482683  | MPB/MABC        | YE                | 2               | 1 | 1 | 1 | 0              | 0 | 0 | 1 | 2                  | 2 | 1 | 2              | 2 | 1 | 16                   |
| European Cardiac Arrh          | EPH                                        | RE                                          | 31482331  | MPB/MABC        | YE                | 2               | 1 | 1 | 1 | 0              | 0 | 0 | 1 | 2                  | 2 | 1 | 2              | 2 | 1 | 16                   |
| Evaluation of tools to         | EPH                                        | RE                                          | 31684872  | MPB/MABC        | SB                | 2               | 1 | 1 | 1 | 3              | 2 | 1 | 1 | 0                  | 2 | 1 | 2              | 2 | 1 | 20                   |
| Factors Impacting Pati         | EPH                                        | RE                                          | 31100851  | MPB/MABC        | MPB               | 2               | 1 | 1 | 1 | 3              | 2 | 1 | 1 | 0                  | 0 | 0 | 0              | 0 | 1 | 13                   |
| Family presence durin          | EPH                                        | RE                                          | 31733825  | MPB/MABC        | MPB               | 2               | 1 | 1 | 1 | 0              | 0 | 0 | 0 | 0                  | 0 | 1 | 2              | 2 | 1 | 11                   |
| Imaging for sudden ca          | EPH                                        | RE                                          | 31054859  | MPB/MABC        | MPB               | 2               | 1 | 1 | 1 | 0              | 0 | 0 | 1 | 2                  | 2 | 1 | 0              | 0 | 1 | 12                   |
| Impact of Implantable          | EPH                                        | RE                                          | 30052536  | MPB/MABC        | EM                | 2               | 1 | 1 | 1 | 3              | 2 | 1 | 1 | 0                  | 2 | 1 | 2              | 0 | 1 | 18                   |
| Impact of mineralocort         | EPH                                        | RE                                          | 30264282  | MPB/MABC        | YE                | 2               | 1 | 1 | 1 | 3              | 0 | 0 | 1 | 2                  | 2 | 1 | 2              | 2 | 1 | 19                   |
| Implantable cardiovert         | EPH                                        | RE                                          | 31471226  | MPB/MABC        | EM                | 2               | 1 | 1 | 1 | 3              | 2 | 0 | 1 | 0                  | 2 | 1 | 2              | 0 | 1 | 17                   |
| Interventions to impro         | EPH                                        | RE                                          | 30759140  | MPB/MABC        | MPB               | 2               | 1 | 1 | 1 | 3              | 2 | 1 | 1 | 2                  | 2 | 1 | 2              | 2 | 1 | 22                   |
| Is Sauna Bathing Prot          | EPH                                        | RE                                          | 31102597  | MPB/MABC        | EM                | 2               | 1 | 1 | 1 | 0              | 2 | 1 | 1 | 0                  | 2 | 1 | 0              | 0 | 1 | 13                   |
| Is sauna bathing prote         | EPH                                        | RE                                          | 31102597  | MPB/MABC        | MABC              | 2               | 1 | 0 | 1 | 0              | 0 | 0 | 1 | 0                  | 2 | 0 | 0              | 2 | 0 | 9                    |
| Key components of a c          | EPH                                        | RE                                          | 30858511  | MPB/MABC        | MPB               | 2               | 1 | 1 | 1 | 0              | 0 | 0 | 1 | 2                  | 2 | 1 | 2              | 0 | 0 | 13                   |
| Major Adverse Cardiac          | EPH                                        | RE                                          | 30557212  | MPB/MABC        | JW                | 2               | 1 | 1 | 1 | 0              | 2 | 1 | 1 | 2                  | 2 | 1 | 0              | 0 | 0 | 14                   |
| Mechanisms of Arrhyt           | EPH                                        | RE                                          | 30825952  | MPB/MABC        | YE                | 2               | 1 | 1 | 1 | 0              | 0 | 0 | 1 | 2                  | 2 | 1 | 2              | 0 | 1 | 14                   |
| Mitral valve prolapse          | EPH                                        | RE                                          | 30242141  | MPB/MABC        | MPB               | 2               | 1 | 1 | 1 | 3              | 2 | 1 | 1 | 2                  | 2 | 1 | 0              | 0 | 1 | 18                   |
| Nighttime is associat          | EPH                                        | RE                                          | 30630680  | MPB/MABC        | MABC              | 2               | 1 | 1 | 1 | 3              | 2 | 1 | 1 | 2                  | 2 | 1 | 2              | 2 | 1 | 22                   |
| Nighttime is associat          | EPH                                        | RE                                          | 30630680  | MPB/MABC        | YE                | 2               | 1 | 1 | 1 | 3              | 2 | 1 | 1 | 0                  | 2 | 1 | 2              | 2 | 1 | 20                   |
| Non-arrhythmic causes          | EPH                                        | RE                                          | 31075277  | MPB/MABC        | MPB               | 2               | 1 | 1 | 1 | 0              | 0 | 0 | 1 | 0                  | 2 | 1 | 0              | 0 | 1 | 10                   |
| Predictors of Adverse          | EPH                                        | RE                                          | 31180938  | MABC            | MABC              | 2               | 1 | 1 | 1 | 3              | 2 | 1 | 1 | 0                  | 2 | 1 | 2              | 2 | 1 | 20                   |
| Prevention of Sudden           | EPH                                        | RE                                          | 31022955  | MPB/MABC        | YE                | 2               | 1 | 1 | 1 | 0              | 0 | 0 | 1 | 2                  | 2 | 1 | 2              | 2 | 1 | 16                   |
| Prevention of Sudden           | EPH                                        | RE                                          | 31022955  | MPB/MABC        | MPB               | 2               | 1 | 1 | 1 | 0              | 0 | 0 | 1 | 0                  | 2 | 1 | 2              | 2 | 1 | 14                   |
| Race, ethnicity, and th        | EPH                                        | RE                                          | 30029848  | MPB/MABC        | JW                | 2               | 1 | 1 | 1 | 0              | 2 | 0 | 1 | 2                  | 2 | 1 | 2              | 0 | 1 | 16                   |
| Relation of Body Mas           | EPH                                        | RE                                          | 31105141  | MPB/MABC        | SB                | 2               | 1 | 1 | 1 | 3              | 2 | 1 | 1 | 0                  | 2 | 1 | 2              | 2 | 1 | 20                   |
| Risk stratification for        | EPH                                        | RE                                          | 31422711  | MPB/MABC        | MPB               | 2               | 1 | 1 | 1 | 0              | 0 | 0 | 1 | 0                  | 2 | 1 | 0              | 0 | 1 | 10                   |
| Shock Index as a Pred          | EPH                                        | RE                                          | 30719462  | MPB/MABC        | YE                | 2               | 1 | 1 | 1 | 0              | 0 | 0 | 1 | 2                  | 2 | 1 | 2              | 0 | 1 | 14                   |
| Socio-economic differ          | EPH                                        | RE                                          | 31199944  | MPB/MABC        | JW                | 2               | 1 | 1 | 1 | 3              | 2 | 1 | 1 | 2                  | 2 | 1 | 0              | 0 | 1 | 18                   |
| Sudden Cardiac Death           | EPH                                        | RE                                          | 31118017  | MABC            | MABC              | 2               | 1 | 1 | 1 | 0              | 0 | 0 | 0 | 0                  | 0 | 0 | 2              | 2 | 1 | 10                   |

|                         |     |    |          |          |      |   |   |   |   |   |   |   |   |   |   |   |   |   |   |    |
|-------------------------|-----|----|----------|----------|------|---|---|---|---|---|---|---|---|---|---|---|---|---|---|----|
| Sudden Cardiac Death    | EPH | RE | 30392982 | MPB/MABC | JW   | 2 | 1 | 1 | 1 | 0 | 0 | 0 | 0 | 2 | 2 | 1 | 2 | 0 | 1 | 13 |
| Sudden Cardiac Death    | EPH | RE | 31008774 | MPB/MABC | MABC | 2 | 1 | 1 | 0 | 0 | 0 | 0 | 0 | 0 | 2 | 0 | 2 | 2 | 0 | 10 |
| Sudden cardiac death i  | EPH | RE | 31538192 | MPB/MABC | YE   | 2 | 1 | 1 | 1 | 0 | 0 | 0 | 0 | 2 | 2 | 1 | 2 | 0 | 1 | 13 |
| Sudden Cardiac Death    | EPH | RE | 31279425 | MPB/MABC | YE   | 2 | 1 | 1 | 1 | 0 | 0 | 0 | 1 | 2 | 2 | 1 | 2 | 0 | 1 | 14 |
| Sudden cardiac death i  | EPH | RE | 31075279 | MPB/MABC | MABC | 2 | 1 | 0 | 1 | 0 | 0 | 0 | 0 | 0 | 2 | 1 | 2 | 0 | 1 | 10 |
| Sudden Cardiac Death    | EPH | RE | 31199891 | MPB/MABC | MABC | 2 | 1 | 1 | 0 | 0 | 0 | 0 | 0 | 0 | 2 | 0 | 2 | 2 | 0 | 10 |
| Sudden Cardiac Death    | EPH | RE | 30447717 | MABC     | MABC | 2 | 1 | 1 | 1 | 0 | 0 | 0 | 0 | 0 | 0 | 0 | 2 | 2 | 1 | 10 |
| Sudden Cardiac Death    | EPH | RE | 31378334 | MPB/MABC | JW   | 2 | 1 | 1 | 1 | 0 | 0 | 0 | 0 | 2 | 0 | 1 | 0 | 0 | 0 | 8  |
| Sudden Death and Ver    | EPH | RE | 30554599 | MPB/MABC | SB   | 2 | 1 | 1 | 1 | 0 | 0 | 0 | 0 | 0 | 0 | 0 | 2 | 2 | 1 | 10 |
| Sudden death in heart   | EPH | RE | 31147814 | MPB/MABC | EM   | 2 | 1 | 1 | 1 | 0 | 2 | 1 | 1 | 0 | 2 | 1 | 2 | 0 | 1 | 15 |
| Sudden Death Risk-St    | EPH | RE | 30482684 | MPB/MABC | YE   | 2 | 1 | 1 | 1 | 0 | 0 | 0 | 1 | 2 | 2 | 1 | 2 | 0 | 1 | 14 |
| Sudden unexpected de    | EPH | RE | 30566897 | MPB/MABC | MPB  | 2 | 1 | 1 | 1 | 0 | 0 | 0 | 1 | 2 | 2 | 1 | 2 | 0 | 1 | 14 |
| Systematic Meta-Anal    | EPH | RE | 31447468 | MPB/MABC | SB   | 2 | 1 | 1 | 1 | 3 | 2 | 1 | 1 | 0 | 2 | 1 | 2 | 2 | 1 | 20 |
| Systematic Meta-Anal    | EPH | RE | 31447468 | MPB/MABC | MPB  | 0 | 0 | 1 | 1 | 3 | 2 | 1 | 1 | 0 | 2 | 1 | 2 | 0 | 1 | 15 |
| Systematic review of t  | EPH | RE | 31740470 | MPB/MABC | JW   | 2 | 1 | 1 | 1 | 3 | 2 | 1 | 1 | 2 | 2 | 1 | 2 | 0 | 1 | 20 |
| The Danish in-hospita   | EPH | RE | 31191032 | MPB/MABC | EM   | 2 | 1 | 1 | 1 | 0 | 2 | 0 | 1 | 0 | 2 | 1 | 2 | 0 | 1 | 14 |
| The incidence and outc  | EPH | RE | 30593842 | MPB/MABC | MPB  | 2 | 1 | 1 | 1 | 3 | 2 | 1 | 1 | 2 | 2 | 1 | 2 | 0 | 1 | 20 |
| The incidence of cardi  | EPH | RE | 31037107 | MPB/MABC | YE   | 2 | 1 | 1 | 1 | 3 | 2 | 1 | 1 | 2 | 2 | 1 | 2 | 0 | 1 | 20 |
| The necessity of impla  | EPH | RE | 30642644 | MABC     | MABC | 2 | 1 | 1 | 1 | 0 | 0 | 0 | 0 | 0 | 0 | 0 | 2 | 2 | 1 | 10 |
| The prevention and ma   | EPH | RE | 31471226 | MPB/MABC | EM   | 2 | 1 | 1 | 1 | 0 | 2 | 0 | 1 | 0 | 2 | 1 | 2 | 2 | 1 | 16 |
| The prevention and ma   | EPH | RE | 31308007 | MPB/MABC | SC   | 2 | 0 | 1 | 1 | 0 | 0 | 0 | 0 | 2 | 2 | 1 | 2 | 0 | 1 | 12 |
| The role of cardiorespi | EPH | RE | 31075278 | MPB/MABC | MPB  | 2 | 1 | 1 | 1 | 3 | 2 | 0 | 1 | 2 | 2 | 1 | 2 | 0 | 1 | 19 |
| Towards cardiac MRI i   | EPH | RE | 30377260 | MPB/MABC | YE   | 2 | 1 | 1 | 1 | 0 | 0 | 0 | 1 | 2 | 2 | 1 | 2 | 0 | 1 | 14 |
| Training Adult Laypec   | EPH | RE | 30808611 | MPB/MABC | MABC | 2 | 1 | 1 | 1 | 3 | 2 | 1 | 1 | 2 | 2 | 1 | 2 | 2 | 1 | 22 |
| Treatment of ventricul  | EPH | RE | 30268648 | MPB/MABC | SB   | 2 | 1 | 1 | 1 | 0 | 0 | 0 | 0 | 0 | 0 | 0 | 2 | 2 | 1 | 10 |
| What causes sudden de   | EPH | RE | 31390006 | MPB/MABC | MPB  | 2 | 0 | 1 | 1 | 0 | 0 | 0 | 1 | 2 | 2 | 1 | 0 | 0 | 1 | 11 |
| 2019 American Heart J   | GL  | RE | 31722552 | RB       | DR   | 2 | 1 | 1 | 1 | 3 | 0 | 0 | 1 | 2 | 2 | 1 | 2 | 2 | 1 | 19 |
| 2019 American Heart J   | GL  | RE | 31722552 | RB       | RB   | 2 | 1 | 1 | 1 | 3 | 0 | 0 | 1 | 2 | 2 | 1 | 2 | 2 | 1 | 19 |
| 2019 American Heart J   | GL  | RE | 31722563 | RB       | RB   | 2 | 1 | 1 | 1 | 3 | 2 | 1 | 1 | 2 | 2 | 1 | 2 | 2 | 1 | 22 |
| 2019 American Heart J   | GL  | RE | 31722563 | RB       | JD   | 2 | 1 | 1 | 1 | 3 | 2 | 1 | 1 | 2 | 2 | 1 | 2 | 2 | 1 | 22 |
| 2019 International Cor  | GL  | RE | 31734223 | RB       | RB   | 2 | 1 | 1 | 1 | 3 | 0 | 0 | 1 | 2 | 2 | 1 | 2 | 2 | 1 | 19 |
| 2019 International Cor  | GL  | RE | 31734223 | RB       | DR   | 2 | 1 | 1 | 1 | 0 | 2 | 0 | 1 | 2 | 2 | 1 | 2 | 2 | 1 | 18 |
| A Complete Review o     | GL  | RE | 30971592 | RB       | JD   | 2 | 0 | 1 | 1 | 3 | 2 | 0 | 1 | 2 | 2 | 1 | 2 | 0 | 1 | 18 |
| A Systematic Literatur  | GL  | RE | 31695740 | RB       | JD   | 2 | 1 | 1 | 1 | 3 | 2 | 1 | 1 | 2 | 2 | 1 | 2 | 2 | 1 | 22 |
| A systematic literature | GL  | RE | 31695740 | RB       | RB   | 2 | 1 | 1 | 1 | 3 | 2 | 1 | 1 | 2 | 2 | 1 | 2 | 0 | 1 | 20 |
| Advanced Airway Man     | GL  | RE | 30981882 | RB       | JD   | 2 | 1 | 1 | 1 | 3 | 2 | 1 | 1 | 2 | 2 | 1 | 2 | 2 | 1 | 22 |
| Advanced airway man     | GL  | RE | 30981882 | RB       | RB   | 2 | 1 | 1 | 1 | 3 | 2 | 1 | 1 | 2 | 2 | 1 | 2 | 2 | 1 | 22 |
| Advances in the Risk    | GL  | RE | 31255188 | RB       | JD   | 2 | 1 | 1 | 1 | 0 | 0 | 0 | 0 | 0 | 2 | 1 | 2 | 0 | 1 | 11 |
| Advances in the Risk    | GL  | RE | 31255188 | RB       | RB   | 2 | 1 | 1 | 1 | 0 | 0 | 0 | 0 | 0 | 2 | 1 | 0 | 0 | 1 | 9  |
| An International, Cons  | GL  | RE | 30925524 | RB       | JD   | 2 | 1 | 1 | 1 | 3 | 2 | 0 | 1 | 2 | 2 | 1 | 2 | 2 | 1 | 21 |
| An international, cons  | GL  | RE | 30925524 | RB       | RB   | 2 | 1 | 1 | 1 | 0 | 0 | 0 | 0 | 2 | 2 | 1 | 2 | 0 | 0 | 12 |
| Cadaver models for ca   | GL  | RE | 31412293 | RB       | DR   | 2 | 1 | 1 | 1 | 0 | 2 | 1 | 1 | 2 | 2 | 1 | 2 | 2 | 1 | 19 |
| Cadaver models for ca   | GL  | RE | 31412293 | RB       | RB   | 2 | 1 | 1 | 1 | 0 | 2 | 1 | 1 | 2 | 2 | 1 | 2 | 0 | 1 | 17 |
| Canadian Cardiovascu    | GL  | RE | 30595170 | RB       | DR   | 2 | 1 | 1 | 1 | 0 | 0 | 0 | 0 | 0 | 2 | 1 | 2 | 0 | 0 | 10 |
| Canadian Cardiovascu    | GL  | RE | 30595170 | RB       | RB   | 2 | 1 | 1 | 1 | 0 | 0 | 0 | 1 | 0 | 2 | 1 | 2 | 0 | 0 | 11 |
| Cardiac Surgical Resu   | GL  | RE | 31351560 | RB       | DR   | 2 | 1 | 0 | 1 | 0 | 0 | 0 | 0 | 2 | 2 | 1 | 2 | 2 | 0 | 13 |
| COACHRED: A Protoc      | GL  | RE | 31456338 | RB       | JD   | 2 | 1 | 1 | 1 | 0 | 0 | 0 | 0 | 0 | 2 | 2 | 1 | 2 | 2 | 15 |
| European Resuscitatio   | GL  | RE | 30496838 | RB       | RB   | 2 | 1 | 1 | 1 | 0 | 0 | 0 | 0 | 2 | 2 | 1 | 2 | 0 | 0 | 12 |
| European Resuscitatio   | GL  | RE | 30496838 | RB       | DR   | 2 | 1 | 1 | 1 | 0 | 0 | 0 | 0 | 2 | 2 | 1 | 2 | 0 | 1 | 13 |
| In-flight Cardiac Arres | GL  | RE | 30232737 | RB       | JD   | 2 | 0 | 1 | 1 | 0 | 0 | 0 | 0 | 0 | 0 | 1 | 0 | 0 | 1 | 6  |
| Invasive Management     | GL  | RE | 31510774 | RB       | JD   | 2 | 1 | 1 | 1 | 0 | 0 | 0 | 0 | 0 | 2 | 1 | 2 | 0 | 1 | 11 |
| Meta-Analysis Compa     | GL  | RE | 31858970 | RB       | JD   | 2 | 1 | 1 | 1 | 3 | 2 | 1 | 1 | 2 | 2 | 1 | 2 | 2 | 1 | 22 |

|                          |    |    |          |    |       |   |   |   |   |   |   |   |   |   |   |   |   |   |   |    |
|--------------------------|----|----|----------|----|-------|---|---|---|---|---|---|---|---|---|---|---|---|---|---|----|
| New Approaches in th     | GL | RE | 31100908 | RB | RB    | 2 | 1 | 1 | 1 | 0 | 0 | 0 | 0 | 0 | 2 | 1 | 2 | 0 | 1 | 11 |
| New Approaches in th     | GL | RE | 31100908 | RB | JD    | 2 | 1 | 1 | 1 | 0 | 0 | 0 | 1 | 0 | 2 | 0 | 0 | 0 | 1 | 9  |
| New Concepts in Sudc     | GL | RE | 30621954 | RB | JD    | 2 | 1 | 1 | 1 | 0 | 0 | 0 | 1 | 2 | 2 | 1 | 2 | 0 | 1 | 14 |
| New Concepts in Sudc     | GL | RE | 30621954 | RB | RB    | 2 | 1 | 1 | 1 | 0 | 0 | 0 | 1 | 2 | 2 | 1 | 2 | 0 | 1 | 14 |
| Optimizing the Early I   | GL | RE | 31512559 | RB | DR    | 2 | 1 | 0 | 0 | 0 | 0 | 0 | 0 | 2 | 2 | 1 | 2 | 0 | 1 | 11 |
| Optimizing the Early I   | GL | RE | 31512559 | RB | RB    | 2 | 1 | 1 | 0 | 0 | 0 | 0 | 0 | 2 | 2 | 1 | 2 | 0 | 1 | 12 |
| Personalized physiolo    | GL | RE | 30741366 | RB | DR    | 2 | 1 | 0 | 1 | 0 | 0 | 0 | 0 | 0 | 2 | 1 | 2 | 0 | 0 | 9  |
| Recent advances in per   | GL | RE | 31249674 | RB | DR    | 2 | 1 | 0 | 1 | 0 | 0 | 0 | 0 | 2 | 2 | 1 | 2 | 0 | 1 | 12 |
| Recent advances in per   | GL | RE | 31249674 | RB | RB    | 2 | 1 | 1 | 1 | 0 | 0 | 0 | 0 | 2 | 2 | 1 | 2 | 0 | 1 | 13 |
| Recommendations for      | GL | RE | 30361819 | RB | DR    | 2 | 1 | 1 | 1 | 0 | 0 | 0 | 0 | 2 | 0 | 1 | 2 | 2 | 1 | 13 |
| Resuscitation of the Pr  | GL | RE | 30940377 | RB | DR    | 2 | 1 | 0 | 1 | 0 | 0 | 0 | 0 | 0 | 2 | 1 | 2 | 2 | 0 | 11 |
| Resuscitation of the Pr  | GL | RE | 30940377 | RB | RB    | 2 | 1 | 1 | 1 | 0 | 0 | 0 | 0 | 0 | 2 | 1 | 2 | 2 | 0 | 12 |
| The changes in cardiop   | GL | RE | 31938692 | RB | DR    | 2 | 1 | 1 | 1 | 0 | 0 | 0 | 0 | 2 | 0 | 1 | 2 | 2 | 1 | 13 |
| The changes in cardiop   | GL | RE | 31938692 | RB | RB    | 2 | 1 | 1 | 1 | 0 | 0 | 0 | 0 | 2 | 2 | 1 | 2 | 0 | 1 | 13 |
| The Critical Care Liter  | GL | RE | 31831348 | RB | JD    | 2 | 1 | 1 | 1 | 3 | 0 | 0 | 1 | 2 | 2 | 1 | 2 | 2 | 1 | 19 |
| Update on Prevention     | GL | RE | 30449537 | RB | JD    | 2 | 1 | 1 | 1 | 0 | 0 | 0 | 0 | 2 | 2 | 1 | 2 | 0 | 1 | 13 |
| Update on prevention :   | GL | RE | 30449537 | RB | RB    | 0 | 1 | 1 | 1 | 0 | 0 | 0 | 0 | 2 | 2 | 1 | 2 | 0 | 1 | 11 |
| Vasopressors during A    | GL | RE | 30980877 | RB | JD    | 2 | 1 | 1 | 1 | 3 | 2 | 1 | 1 | 2 | 2 | 1 | 2 | 2 | 1 | 22 |
| Vasopressors during ac   | GL | RE | 30980877 | RB | RB    | 2 | 1 | 1 | 1 | 3 | 2 | 1 | 1 | 2 | 2 | 1 | 2 | 2 | 1 | 22 |
| Ventilation During Ca    | GL | RE | 31138729 | RB | DR    | 2 | 1 | 0 | 1 | 0 | 0 | 0 | 0 | 2 | 2 | 1 | 2 | 0 | 0 | 11 |
| Adult post-cardiac arre  | IN | RE | 31846693 | CH | GS    | 2 | 1 | 1 | 1 | 3 | 2 | 1 | 1 | 2 | 2 | 1 | 0 | 0 | 0 | 17 |
| Beta-blockade for the t  | IN | RE | 31790759 | DC | DR/KH | 2 | 1 | 1 | 1 | 3 | 2 | 1 | 1 | 2 | 2 | 1 | 2 | 2 | 1 | 22 |
| Can Systemic Thromb      | IN | RE | 31594741 | CH | KD    | 2 | 1 | 1 | 1 | 3 | 2 | 1 | 1 | 2 | 2 | 1 | 2 | 0 | 1 | 20 |
| Cardiac arrest after car | IN | RE | 30710033 | CH | DB    | 2 | 1 | 1 | 1 | 0 | 0 | 0 | 1 | 0 | 2 | 1 | 2 | 2 | 0 | 13 |
| Cardiac Arrest and Car   | IN | RE | 31522544 | CH | DC    | 2 | 1 | 1 | 1 | 0 | 0 | 0 | 0 | 2 | 2 | 1 | 0 | 0 | 1 | 11 |
| Cardiac Arrest and Car   | IN | RE | 31536777 | CH | CH    | 2 | 1 | 1 | 1 | 0 | 0 | 0 | 0 | 2 | 2 | 1 | 0 | 0 | 1 | 11 |
| Cardiac Arrest and Car   | IN | RE | 31536777 | CH | RL    | 2 | 1 | 0 | 1 | 0 | 0 | 0 | 0 | 2 | 2 | 1 | 0 | 0 | 1 | 10 |
| Clinical Efficacy of Ex  | IN | RE | 31360719 | CH | GS    | 2 | 1 | 1 | 1 | 3 | 2 | 1 | 1 | 2 | 2 | 1 | 2 | 2 | 1 | 22 |
| Clinical Pearls of Ven   | IN | RE | 31364329 | CH | GS    | 2 | 1 | 1 | 1 | 0 | 0 | 0 | 0 | 2 | 2 | 1 | 2 | 0 | 0 | 12 |
| Contemporary manage      | IN | RE | 31867056 | CH | DB    | 2 | 1 | 1 | 1 | 3 | 0 | 0 | 1 | 2 | 2 | 1 | 2 | 2 | 1 | 19 |
| Coronary angiography     | IN | RE | 31442472 | CH | DB    | 2 | 1 | 1 | 1 | 0 | 2 | 1 | 1 | 0 | 2 | 1 | 2 | 0 | 1 | 15 |
| Diagnostic yield of no   | IN | RE | 30201536 | CH | GS    | 2 | 1 | 1 | 1 | 0 | 2 | 1 | 1 | 2 | 2 | 1 | 2 | 0 | 1 | 17 |
| Does care at a cardiac e | IN | RE | 30779976 | CH | RL    | 2 | 1 | 1 | 1 | 3 | 2 | 1 | 1 | 2 | 2 | 1 | 2 | 0 | 1 | 20 |
| Effect of different metl | IN | RE | 31443696 | CH | DC    | 2 | 1 | 1 | 1 | 3 | 2 | 1 | 1 | 2 | 2 | 1 | 2 | 2 | 1 | 22 |
| Extended Indications f   | IN | RE | 31014165 | CH | GS    | 2 | 1 | 1 | 1 | 0 | 0 | 0 | 0 | 0 | 2 | 1 | 2 | 0 | 0 | 10 |
| Extra corporeal membr    | IN | RE | 30817400 | CH | RL    | 2 | 1 | 1 | 1 | 0 | 0 | 0 | 1 | 2 | 2 | 1 | 2 | 2 | 1 | 16 |
| Extracorporeal membr     | IN | RE | 31618362 | CH | DB    | 2 | 1 | 1 | 1 | 3 | 2 | 0 | 1 | 2 | 2 | 1 | 2 | 2 | 0 | 20 |
| Gender differences in t  | IN | RE | 31409393 | CH | KD    | 2 | 1 | 1 | 1 | 3 | 2 | 1 | 1 | 2 | 2 | 1 | 2 | 0 | 1 | 20 |
| Hospital management      | IN | RE | 30747004 | CH | DC    | 2 | 1 | 1 | 1 | 0 | 0 | 0 | 0 | 2 | 2 | 1 | 2 | 0 | 0 | 12 |
| Hypothermia and cardi    | IN | RE | 30544147 | CH | DC    | 2 | 1 | 1 | 1 | 0 | 0 | 0 | 1 | 2 | 2 | 1 | 2 | 2 | 1 | 16 |
| Impact of Structured P   | IN | RE | 31306259 | CH | RL    | 0 | 1 | 1 | 1 | 3 | 2 | 1 | 1 | 2 | 2 | 1 | 2 | 2 | 1 | 20 |
| In the ICU - delirium i  | IN | RE | 30985357 | CH | RL    | 2 | 1 | 1 | 1 | 0 | 0 | 0 | 0 | 2 | 2 | 1 | 2 | 2 | 1 | 15 |
| In-Hospital Cardiac Ar   | IN | RE | 30912843 | CH | DC    | 2 | 1 | 1 | 1 | 3 | 2 | 0 | 1 | 2 | 2 | 1 | 2 | 2 | 1 | 21 |
| Management of Out-of     | IN | RE | 31758275 | CH | GS    | 2 | 1 | 1 | 1 | 0 | 0 | 0 | 0 | 0 | 2 | 1 | 2 | 0 | 0 | 10 |
| Management of post-c     | IN | RE | 31723926 | CH | KD    | 0 | 1 | 1 | 0 | 0 | 0 | 0 | 0 | 2 | 2 | 1 | 2 | 2 | 1 | 12 |
| Neuroprotective Propel   | IN | RE | 31758401 | CH | CH    | 2 | 1 | 1 | 1 | 0 | 0 | 0 | 1 | 2 | 2 | 1 | 2 | 0 | 1 | 14 |
| Neuroprotective Propel   | IN | RE | 31758401 | CH | RL    | 2 | 1 | 1 | 1 | 0 | 0 | 0 | 0 | 2 | 2 | 1 | 2 | 0 | 1 | 13 |
| Optimal timing of con    | IN | RE | 31580909 | CH | KD    | 2 | 1 | 1 | 1 | 3 | 2 | 1 | 1 | 2 | 2 | 1 | 2 | 2 | 1 | 22 |
| Out-of-hospital cardiac  | IN | RE | 31022086 | CH | DC    | 2 | 1 | 1 | 1 | 0 | 0 | 0 | 0 | 2 | 2 | 1 | 2 | 0 | 1 | 13 |
| Outcomes of extracorp    | IN | RE | 31790756 | CH | DB    | 2 | 1 | 1 | 1 | 0 | 2 | 1 | 1 | 0 | 2 | 1 | 2 | 2 | 1 | 17 |
| Perfusion parameters a   | IN | RE | 31473622 | CH | RL    | 2 | 1 | 1 | 0 | 3 | 2 | 1 | 1 | 2 | 2 | 1 | 2 | 2 | 1 | 21 |
| Postresuscitation care : | IN | RE | 31021845 | CH | DB    | 0 | 1 | 1 | 1 | 0 | 0 | 0 | 1 | 2 | 2 | 1 | 2 | 2 | 1 | 14 |

|                          |     |    |          |    |       |   |   |   |   |   |   |   |   |   |   |   |   |   |    |    |
|--------------------------|-----|----|----------|----|-------|---|---|---|---|---|---|---|---|---|---|---|---|---|----|----|
| Postresuscitation Care   | IN  | RE | 31021845 | CH | CH    | 2 | 1 | 1 | 1 | 0 | 0 | 0 | 1 | 2 | 2 | 1 | 2 | 2 | 1  | 16 |
| Prophylactic antibiotic  | IN  | RE | 31085216 | CH | DC    | 2 | 1 | 1 | 1 | 3 | 2 | 1 | 1 | 2 | 2 | 1 | 2 | 2 | 1  | 22 |
| Racial Differences in t  | IN  | RE | 31845289 | CH | RL    | 2 | 1 | 1 | 1 | 0 | 2 | 0 | 1 | 2 | 2 | 1 | 2 | 2 | 1  | 18 |
| Rapid response system    | IN  | RE | 31723915 | CH | DB    | 2 | 1 | 1 | 1 | 3 | 0 | 0 | 0 | 2 | 2 | 1 | 2 | 2 | 0  | 17 |
| Short-term outcomes c    | IN  | RE | 30485466 | CH | GS    | 2 | 1 | 1 | 1 | 0 | 2 | 1 | 1 | 0 | 2 | 1 | 2 | 0 | 1  | 15 |
| Sinus Bradycardia Dur    | IN  | RE | 31660784 | CH | CH    | 2 | 1 | 1 | 1 | 3 | 2 | 1 | 1 | 2 | 2 | 1 | 2 | 2 | 1  | 22 |
| Sinus Bradycardia Dur    | IN  | RE | 31660784 | CH | KD    | 2 | 1 | 1 | 1 | 3 | 2 | 1 | 1 | 2 | 2 | 1 | 2 | 2 | 1  | 22 |
| Strategies for Left Ven  | IN  | RE | 31530454 | CH | DC    | 2 | 1 | 1 | 1 | 0 | 2 | 0 | 1 | 2 | 2 | 1 | 2 | 2 | 1  | 18 |
| Structured review of pu  | IN  | RE | 31522913 | CH | GS    | 2 | 1 | 0 | 1 | 0 | 0 | 0 | 0 | 0 | 2 | 1 | 2 | 0 | 1  | 10 |
| Systematic review and    | IN  | RE | 31730898 | CH | DC    | 2 | 1 | 1 | 1 | 3 | 2 | 1 | 1 | 2 | 2 | 1 | 2 | 2 | 1  | 22 |
| Targeted temperature n   | IN  | RE | 31384664 | CH | DB    | 2 | 1 | 1 | 1 | 3 | 2 | 1 | 1 | 2 | 2 | 1 | 2 | 2 | 0  | 21 |
| Targeted Temperature I   | IN  | RE | 31262410 | CH | KD    | 2 | 1 | 1 | 1 | 0 | 0 | 0 | 0 | 2 | 2 | 1 | 2 | 0 | 1  | 13 |
| Targeted temperature n   | IN  | RE | 31078561 | CH | CH    | 2 | 1 | 1 | 1 | 0 | 0 | 0 | 1 | 2 | 2 | 1 | 2 | 2 | 1  | 16 |
| Targeted temperature n   | IN  | RE | 31078561 | CH | RL    | 2 | 1 | 1 | 1 | 0 | 0 | 0 | 1 | 2 | 2 | 1 | 2 | 2 | 1  | 16 |
| The necessity of conve   | IN  | RE | 30342787 | CH | DB    | 2 | 1 | 1 | 1 | 0 | 0 | 0 | 0 | 2 | 2 | 1 | 2 | 0 | 0  | 12 |
| The Patient Selection    | IN  | RE | 31720177 | CH | GS    | 2 | 1 | 1 | 1 | 0 | 0 | 0 | 0 | 2 | 2 | 1 | 2 | 2 | 1  | 15 |
| The Use of Transesoph    | IN  | RE | 30280396 | DC | RC/KH | 2 | 1 | 1 | 1 | 3 | 2 | 0 | 0 | 2 | 2 | 1 | 2 | 2 | 1  | 20 |
| Therapeutic hypotherm    | IN  | RE | 31778636 | CH | GS    | 2 | 1 | 1 | 1 | 3 | 2 | 1 | 1 | 2 | 2 | 1 | 2 | 0 | 1  | 20 |
| Utility and Challenges   | IN  | RE | 31000007 | CH | KD    | 2 | 1 | 1 | 1 | 0 | 0 | 0 | 0 | 2 | 2 | 1 | 2 | 0 | 1  | 13 |
| Utility and Challenges   | IN  | RE | 31000007 | CH | CH    | 2 | 1 | 1 | 1 | 0 | 0 | 0 | 1 | 2 | 2 | 1 | 2 | 2 | 1  | 16 |
| Venoarterial extracorp   | IN  | RE | 31116109 | CH | KD    | 2 | 1 | 1 | 0 | 0 | 0 | 0 | 0 | 2 | 1 | 2 | 0 | 1 | 10 |    |
| Vive la rA@sistance! J   | IN  | RE | 30340016 | CH | RL    | 2 | 1 | 1 | 1 | 0 | 2 | 0 | 1 | 2 | 2 | 1 | 0 | 0 | 1  | 14 |
| 2019 American Heart J    | PED | RE | 31727859 | LA | MT    | 2 | 1 | 1 | 1 | 3 | 2 | 1 | 1 | 2 | 2 | 1 | 2 | 2 | 1  | 22 |
| 2019 American Heart J    | PED | RE | 31727859 | LA | LA    | 2 | 1 | 1 | 1 | 3 | 2 | 0 | 1 | 2 | 2 | 1 | 2 | 2 | 1  | 21 |
| 2019 American Heart J    | PED | RE | 31722551 | LA | MN    | 2 | 1 | 1 | 1 | 3 | 2 | 0 | 1 | 2 | 2 | 1 | 2 | 0 | 1  | 19 |
| 2019 American Heart J    | PED | RE | 31722551 | LA | LA    | 2 | 1 | 1 | 1 | 3 | 2 | 0 | 1 | 2 | 2 | 1 | 2 | 2 | 1  | 21 |
| 2019 American Heart J    | PED | RE | 31722546 | LA | SRK   | 2 | 1 | 1 | 1 | 3 | 2 | 0 | 1 | 2 | 2 | 1 | 2 | 0 | 1  | 19 |
| 2019 International Co    | PED | RE | 31722543 | LA | EG    | 2 | 1 | 1 | 1 | 3 | 2 | 0 | 1 | 2 | 2 | 1 | 2 | 2 | 1  | 21 |
| Advanced airway inter    | PED | RE | 30862528 | LA | ME    | 2 | 1 | 1 | 1 | 3 | 0 | 0 | 1 | 2 | 2 | 1 | 2 | 0 | 1  | 17 |
| Basic life support for t | PED | RE | 31556731 | LA | ME    | 2 | 0 | 1 | 1 | 0 | 0 | 0 | 1 | 2 | 0 | 1 | 2 | 0 | 0  | 10 |
| Cardiovascular genom     | PED | RE | 31256468 | LA | MB    | 2 | 1 | 1 | 1 | 0 | 0 | 0 | 0 | 2 | 1 | 0 | 0 | 0 | 8  |    |
| Chest Compressions fi    | PED | RE | 31671867 | LA | MT    | 2 | 1 | 1 | 1 | 0 | 2 | 0 | 1 | 2 | 2 | 1 | 2 | 2 | 1  | 18 |
| Chest-compression-onl    | PED | RE | 30391520 | LA | MN    | 2 | 1 | 1 | 1 | 3 | 2 | 1 | 1 | 0 | 2 | 1 | 0 | 0 | 1  | 16 |
| Comparison of two-th     | PED | RE | 31702646 | LA | MB    | 2 | 1 | 1 | 1 | 0 | 2 | 0 | 1 | 0 | 2 | 1 | 2 | 0 | 1  | 14 |
| Defibrillation energy d  | PED | RE | 31029714 | LA | SK    | 2 | 1 | 1 | 1 | 3 | 2 | 1 | 1 | 2 | 2 | 1 | 2 | 2 | 1  | 22 |
| Defibrillation energy d  | PED | RE | 31029714 | LA | LA    | 2 | 1 | 1 | 1 | 0 | 2 | 1 | 1 | 2 | 2 | 1 | 2 | 0 | 1  | 17 |
| Defibrillation energy d  | PED | RE | 31029714 | LA | SRK   | 2 | 1 | 1 | 1 | 3 | 2 | 1 | 0 | 2 | 2 | 1 | 2 | 0 | 1  | 19 |
| Electrocardiographic A   | PED | RE | 30210005 | LA | EG    | 0 | 1 | 0 | 1 | 0 | 0 | 0 | 0 | 0 | 2 | 1 | 0 | 0 | 0  | 5  |
| Epidemiology of pedic    | PED | RE | 31580845 | LA | ME    | 2 | 1 | 1 | 1 | 0 | 0 | 0 | 1 | 2 | 2 | 1 | 2 | 0 | 1  | 14 |
| Epinephrine in Neonat    | PED | RE | 30987062 | LA | ME    | 2 | 1 | 1 | 1 | 0 | 0 | 0 | 1 | 0 | 2 | 1 | 2 | 0 | 1  | 12 |
| Epinephrine in Neonat    | PED | RE | 30987062 | LA | MB    | 2 | 1 | 1 | 1 | 0 | 0 | 0 | 0 | 0 | 2 | 1 | 2 | 0 | 1  | 11 |
| Extracorporeal membr     | PED | RE | 30854319 | LA | EG    | 2 | 1 | 1 | 1 | 0 | 0 | 0 | 1 | 2 | 2 | 1 | 0 | 0 | 0  | 11 |
| Paediatric targeted tem  | PED | RE | 30951842 | LA | EG    | 2 | 1 | 1 | 1 | 3 | 2 | 1 | 1 | 2 | 2 | 1 | 2 | 0 | 1  | 20 |
| Pediatric Out-of-Hospi   | PED | RE | 31042343 | LA | SK    | 2 | 0 | 1 | 1 | 0 | 0 | 0 | 0 | 0 | 0 | 1 | 0 | 0 | 1  | 6  |
| Pediatric Post-Cardiac   | PED | RE | 31242751 | LA | MT    | 2 | 1 | 1 | 1 | 0 | 2 | 0 | 1 | 2 | 2 | 1 | 2 | 2 | 1  | 18 |
| SUDEP and Grief: Ov      | PED | RE | 30338420 | LA | MT    | 2 | 1 | 1 | 1 | 0 | 2 | 0 | 1 | 2 | 2 | 1 | 2 | 2 | 1  | 18 |
| Therapeutic hypotherm    | PED | RE | 31278022 | LA | MN    | 2 | 1 | 1 | 1 | 0 | 0 | 0 | 0 | 2 | 2 | 1 | 0 | 0 | 1  | 11 |
| Therapeutic hypotherm    | PED | RE | 31278022 | LA | LA    | 2 | 1 | 1 | 1 | 0 | 0 | 0 | 1 | 2 | 2 | 1 | 2 | 2 | 1  | 16 |
| There is No Reason to    | PED | RE | 31286811 | LA | EG    | 2 | 1 | 1 | 1 | 0 | 0 | 0 | 1 | 0 | 2 | 1 | 2 | 2 | 1  | 14 |
| A meta-analysis of the   | PRE | RE | 30917840 | DC | TD    | 2 | 1 | 1 | 1 | 3 | 2 | 1 | 1 | 2 | 2 | 1 | 2 | 2 | 0  | 21 |
| A systematic review ar   | PRE | RE | 30853623 | DC | KY    | 2 | 1 | 1 | 1 | 3 | 2 | 0 | 1 | 2 | 2 | 1 | 2 | 0 | 1  | 19 |
| Adrenaline and vasopr    | PRE | RE | 30653257 | DC | DC    | 2 | 1 | 1 | 1 | 3 | 2 | 1 | 1 | 2 | 2 | 1 | 2 | 0 | 1  | 20 |

|                          |     |    |           |    |       |   |   |   |   |   |   |   |   |   |   |   |   |   |   |    |
|--------------------------|-----|----|-----------|----|-------|---|---|---|---|---|---|---|---|---|---|---|---|---|---|----|
| Advancing emergency      | PRE | RE | 31592072  | DC | KY    | 2 | 1 | 1 | 1 | 0 | 0 | 0 | 0 | 2 | 2 | 1 | 2 | 0 | 1 | 13 |
| Bedside ultrasound in    | PRE | RE | 31889224  | DC | TD    | 2 | 1 | 0 | 0 | 0 | 0 | 0 | 0 | 2 | 2 | 1 | 2 | 0 | 1 | 11 |
| Beta-blockade for the t  | PRE | RE | 31790759  | DC | DR    | 2 | 1 | 1 | 1 | 3 | 2 | 1 | 1 | 2 | 2 | 1 | 2 | 2 | 1 | 22 |
| Can epinephrine therap   | PRE | RE | 30234557  | DC | RC    | 2 | 1 | 1 | 1 | 0 | 2 | 1 | 1 | 2 | 2 | 1 | 2 | 0 | 1 | 17 |
| Chest compression cor    | PRE | RE | 31536776  | DC | CU    | 2 | 1 | 1 | 1 | 0 | 2 | 1 | 1 | 2 | 2 | 1 | 2 | 2 | 1 | 19 |
| Chest compression cor    | PRE | RE | 31536776  | DC | CU/KH | 2 | 1 | 1 | 1 | 0 | 1 | 1 | 1 | 2 | 2 | 1 | 2 | 2 | 1 | 18 |
| Clinical characteristics | PRE | RE | 30771451  | DC | TD    | 2 | 1 | 0 | 1 | 0 | 0 | 1 | 1 | 2 | 2 | 1 | 2 | 0 | 1 | 14 |
| Comparing the efficacy   | PRE | RE | 31355224  | DC | DC    | 2 | 1 | 1 | 1 | 0 | 2 | 1 | 1 | 2 | 2 | 1 | 2 | 0 | 1 | 17 |
| Data Utilization in Em   | PRE | RE | 31042338  | DC | DC    | 2 | 1 | 1 | 1 | 0 | 0 | 0 | 0 | 0 | 2 | 1 | 0 | 0 | 1 | 9  |
| Data Utilization in Em   | PRE | RE | 31042338  | DC | DR    | 2 | 1 | 1 | 1 | 3 | 2 | 0 | 0 | 2 | 2 | 1 | 2 | 2 | 1 | 20 |
| Diagnostic performanc    | PRE | RE | 31887367  | DC | DR    | 2 | 1 | 1 | 1 | 3 | 2 | 1 | 1 | 2 | 2 | 1 | 2 | 2 | 1 | 22 |
| Double sequential defi   | PRE | RE | 31937443  | DC | CU    | 2 | 1 | 1 | 1 | 3 | 2 | 1 | 1 | 2 | 2 | 1 | 2 | 0 | 1 | 20 |
| Double sequential exte   | PRE | RE | 30612966  | DC | DC    | 2 | 1 | 1 | 1 | 0 | 2 | 1 | 1 | 2 | 2 | 1 | 2 | 0 | 1 | 17 |
| Double sequential exte   | PRE | RE | 30612966  | DC | DR    | 2 | 1 | 1 | 1 | 3 | 2 | 1 | 1 | 2 | 2 | 1 | 2 | 2 | 1 | 22 |
| Effects of epinephrine   | PRE | RE | 31702610  | DC | KY    | 2 | 1 | 1 | 1 | 0 | 2 | 0 | 1 | 2 | 2 | 1 | 2 | 2 | 1 | 18 |
| Efficacy and safety of : | PRE | RE | 31561009  | DC | TD    | 2 | 1 | 1 | 1 | 0 | 2 | 1 | 1 | 2 | 2 | 1 | 2 | 0 | 1 | 17 |
| Emergency medical ser    | PRE | RE | 30973523  | DC | KY    | 2 | 1 | 1 | 1 | 3 | 2 | 0 | 1 | 2 | 2 | 1 | 0 | 0 | 1 | 17 |
| Emergent endotracheal    | PRE | RE | 30900042  | DC | DR    | 2 | 1 | 1 | 1 | 3 | 2 | 0 | 1 | 2 | 2 | 1 | 2 | 2 | 1 | 21 |
| Epinephrine for out of   | PRE | RE | 30685547  | DC | DC    | 2 | 1 | 1 | 1 | 3 | 2 | 0 | 1 | 2 | 2 | 1 | 2 | 2 | 1 | 21 |
| Epinephrine for Out-of   | PRE | RE | 31789700  | DC | RC    | 2 | 0 | 1 | 1 | 3 | 2 | 1 | 1 | 2 | 2 | 1 | 2 | 0 | 1 | 19 |
| How effective are epin   | PRE | RE | 31080 029 | DC | CU    | 2 | 0 | 1 | 1 | 0 | 2 | 1 | 1 | 2 | 2 | 1 | 2 | 2 | 1 | 18 |
| How effective are epin   | PRE | RE | 31080029  | DC | CU    | 2 | 0 | 1 | 1 | 0 | 2 | 1 | 1 | 2 | 2 | 1 | 2 | 2 | 1 | 18 |
| Is point of care ultraso | PRE | RE | 30974189  | DC | CU    | 2 | 1 | 1 | 1 | 3 | 2 | 1 | 1 | 2 | 2 | 1 | 2 | 2 | 1 | 22 |
| Is point of care ultraso | PRE | RE | 30974189  | DC | CU    | 2 | 1 | 1 | 1 | 3 | 2 | 1 | 1 | 2 | 2 | 1 | 2 | 2 | 1 | 22 |
| Mechanical chest com     | PRE | RE | 31689757  | DC | CU    | 2 | 1 | 1 | 1 | 3 | 2 | 1 | 1 | 2 | 2 | 1 | 2 | 2 | 1 | 22 |
| Meta-analysis of the ac  | PRE | RE | 31142552  | DC | SC    | 2 | 1 | 1 | 1 | 3 | 2 | 1 | 1 | 2 | 2 | 1 | 2 | 0 | 1 | 20 |
| New physiological ins    | PRE | RE | 30531537  | DC | KY    | 2 | 1 | 1 | 1 | 0 | 0 | 0 | 0 | 2 | 2 | 1 | 2 | 0 | 1 | 13 |
| New physiological ins    | PRE | RE | 30531537  | DC | KY/KH | 2 | 1 | 1 | 1 | 0 | 0 | 0 | 1 | 2 | 2 | 1 | 2 | 2 | 1 | 16 |
| Open-chest cardiopulnr   | PRE | RE | 31881900  | DC | KY    | 2 | 1 | 1 | 1 | 0 | 2 | 0 | 1 | 2 | 2 | 1 | 2 | 2 | 1 | 18 |
| Standard dose epineph    | PRE | RE | 30658877  | DC | KY    | 2 | 1 | 1 | 1 | 3 | 2 | 0 | 1 | 2 | 2 | 1 | 2 | 2 | 1 | 21 |
| The effect of prehospi   | PRE | RE | 31455 452 | DC | CU    | 2 | 1 | 1 | 1 | 3 | 2 | 1 | 1 | 2 | 2 | 1 | 2 | 2 | 1 | 22 |
| The effect of prehospi   | PRE | RE | 31455452  | DC | CU    | 2 | 1 | 1 | 1 | 3 | 2 | 1 | 1 | 2 | 2 | 1 | 2 | 2 | 1 | 22 |
| The effect of prehospi   | PRE | RE | 31572937  | DC | TD    | 2 | 0 | 1 | 0 | 3 | 0 | 0 | 0 | 0 | 2 | 1 | 2 | 0 | 0 | 11 |
| The effect of prehospi   | PRE | RE | 31572937  | DC | TD/KH | 2 | 1 | 1 | 1 | 3 | 2 | 0 | 0 | 2 | 2 | 1 | 2 | 2 | 1 | 20 |
| The effects of adrenalin | PRE | RE | 31116964  | DC | DR    | 2 | 1 | 1 | 1 | 3 | 2 | 1 | 1 | 2 | 2 | 1 | 2 | 2 | 1 | 22 |
| The evolving role of n   | PRE | RE | 31836341  | DC | DR    | 2 | 1 | 1 | 1 | 3 | 2 | 1 | 1 | 2 | 2 | 1 | 2 | 2 | 1 | 22 |
| Understanding the adv    | PRE | RE | 31849717  | DC | CU    | 2 | 1 | 1 | 1 | 0 | 2 | 0 | 1 | 2 | 2 | 1 | 2 | 0 | 1 | 16 |
| Assessing brain injury   | PRO | RE | 31022084  | CM | SZ    | 0 | 1 | 1 | 0 | 0 | 0 | 0 | 0 | 2 | 2 | 1 | 2 | 0 | 1 | 10 |
| Assessing brain injury   | PRO | RE | 31022084  | CM | CM    | 0 | 1 | 1 | 0 | 0 | 0 | 0 | 0 | 2 | 2 | 1 | 2 | 0 | 1 | 10 |
| Assessment of neurooc    | PRO | RE | 31022085  | CM | CC    | 2 | 1 | 1 | 1 | 0 | 0 | 0 | 0 | 2 | 2 | 1 | 2 | 0 | 1 | 13 |
| Diagnostic evaluation    | PRO | RE | 31411341  | CM | SW    | 0 | 1 | 1 | 1 | 0 | 0 | 0 | 0 | 2 | 2 | 1 | 0 | 0 | 0 | 8  |
| Diagnostic evaluation    | PRO | RE | 31411341  | CM | CM    | 0 | 1 | 1 | 1 | 0 | 0 | 0 | 0 | 2 | 2 | 1 | 0 | 0 | 0 | 8  |
| Diagnostic performanc    | PRO | RE | 30878375  | CM | SZ    | 2 | 1 | 1 | 1 | 0 | 2 | 0 | 1 | 2 | 2 | 1 | 2 | 0 | 1 | 16 |
| Diagnostic performanc    | PRO | RE | 30878375  | CM | CM    | 2 | 1 | 1 | 1 | 0 | 2 | 0 | 1 | 2 | 2 | 1 | 0 | 0 | 1 | 14 |
| Effect of Palliative Ca  | PRO | RE | 31579159  | CM | SW    | 0 | 1 | 1 | 0 | 0 | 0 | 0 | 1 | 2 | 2 | 1 | 0 | 0 | 1 | 9  |
| Gap Analysis Regardin    | PRO | RE | 31368059  | CM | JP    | 2 | 1 | 1 | 0 | 0 | 0 | 0 | 0 | 0 | 1 | 0 | 0 | 1 | 6 | 6  |
| Imaging for Neuroprog    | PRO | RE | 31549351  | CM | TK    | 2 | 1 | 1 | 1 | 0 | 1 | 0 | 1 | 2 | 2 | 1 | 2 | 0 | 1 | 15 |
| Imaging for Neuroprog    | PRO | RE | 31549351  | CM | CM    | 2 | 1 | 1 | 0 | 3 | 1 | 0 | 1 | 2 | 2 | 1 | 2 | 0 | 1 | 17 |
| Neurological Prognost    | PRO | RE | 30739213  | CM | SW    | 2 | 1 | 1 | 0 | 0 | 0 | 0 | 0 | 2 | 2 | 1 | 0 | 0 | 0 | 9  |
| Neurological Prognost    | PRO | RE | 30739213  | CM | CM    | 2 | 1 | 1 | 0 | 0 | 0 | 0 | 0 | 2 | 2 | 1 | 0 | 0 | 0 | 9  |
| Neurological Prognost    | PRO | RE | 30739213  | CM | TK    | 2 | 1 | 1 | 0 | 0 | 0 | 0 | 0 | 2 | 2 | 1 | 2 | 0 | 1 | 12 |
| Neurological Prognost    | PRO | RE | 30739213  | CM | CM    | 2 | 1 | 1 | 0 | 0 | 0 | 0 | 0 | 2 | 2 | 1 | 2 | 0 | 1 | 12 |

|                               |     |    |          |    |    |   |   |   |   |   |   |   |   |   |   |   |   |   |    |    |
|-------------------------------|-----|----|----------|----|----|---|---|---|---|---|---|---|---|---|---|---|---|---|----|----|
| Pre-arrest and intra-arrest   | PRO | RE | 31801749 | CM | SZ | 2 | 1 | 1 | 1 | 0 | 2 | 0 | 1 | 2 | 2 | 1 | 2 | 0 | 1  | 16 |
| Procalcitonin as a prognostic | PRO | RE | 30872069 | CM | CC | 2 | 1 | 1 | 1 | 3 | 2 | 1 | 1 | 2 | 0 | 1 | 0 | 0 | 1  | 16 |
| Shock Index as a Predictor    | PRO | RE | 30719462 | CM | TK | 2 | 1 | 1 | 0 | 0 | 0 | 0 | 2 | 2 | 1 | 0 | 0 | 1 | 10 |    |
| SSEP retains its value        | PRO | RE | 31647028 | CM | SW | 0 | 1 | 1 | 1 | 0 | 0 | 0 | 0 | 2 | 2 | 1 | 0 | 0 | 0  | 8  |
| Standards for Studies         | PRO | RE | 31291775 | CM | TK | 2 | 1 | 1 | 1 | 0 | 0 | 0 | 0 | 2 | 2 | 1 | 2 | 2 | 1  | 15 |
| The Full Outline of Unplanned | PRO | RE | 30411302 | CM | JP | 2 | 1 | 1 | 1 | 0 | 2 | 0 | 1 | 0 | 0 | 1 | 0 | 0 | 1  | 10 |
| The Influence of Therapeutic  | PRO | RE | 31768661 | CM | SZ | 2 | 1 | 1 | 1 | 0 | 0 | 0 | 0 | 2 | 2 | 1 | 2 | 0 | 1  | 13 |
