# Supplementary material for: Cardiac arrest: An interdisciplinary scoping review of the literature from 2019
Source: PubMed Central journal article supplement (PMC8244427; doi:10.1016/j.resplu.2020.100037), 2020-11-04
Supplement: mmc8.pdf [file mmc8.pdf]

| <b>Name</b>                    | <b>Email</b>                                                                                   | <b>Role</b>                | <b>Group</b> | <b>Affiliation</b>                                                                                          |
|--------------------------------|------------------------------------------------------------------------------------------------|----------------------------|--------------|-------------------------------------------------------------------------------------------------------------|
| Torben K Becker                | <a href="mailto:t.becker@ufl.edu">t.becker@ufl.edu</a>                                         | Editor-in-Chief            |              | University of Florida, College of Medicine, Department of Emergency Medicine, Division of Critical Care     |
| Travis W Murphy                | <a href="mailto:travis.murphy@surgery.ufl.edu">travis.murphy@surgery.ufl.edu</a>               | Managing Editor            |              | University of Florida, College of Medicine, Department of Emergency Medicine, Division of Critical Care     |
| Scott Cohen, MPH               | <a href="mailto:scohen211@ufl.edu">scohen211@ufl.edu</a>                                       | Technical Editor           |              | University of Florida, College of Medicine, Department of Emergency Medicine                                |
| Francis Han                    | <a href="mailto:omarhan2011@ufl.edu">omarhan2011@ufl.edu</a>                                   | Assistant Technical Editor |              | University of Florida, College of Medicine, Department of Emergency Medicine                                |
| Carolina B Maciel              | <a href="mailto:carolina.maciel@neurology.ufl.edu">carolina.maciel@neurology.ufl.edu</a>       | Editor                     | PRO          | University of Florida, College of Medicine, Department of Neurology, Division of Neurocritical Care         |
| Charles W Hwang                | <a href="mailto:c7places@ufl.edu">c7places@ufl.edu</a>                                         | Editor                     | IN           | University of Florida, College of Medicine, Department of Emergency Medicine                                |
| David B. Crabb                 | <a href="mailto:dcrabb@ufl.edu">dcrabb@ufl.edu</a>                                             | Editor                     | PRE          | University of Florida, College of Medicine, Department of Emergency Medicine                                |
| K. Leslie Avery                | <a href="mailto:avery4@ufl.edu">avery4@ufl.edu</a>                                             | Editor                     | PED          | University of Florida, College of Medicine, Department of Pediatrics                                        |
| Karl Huesgen                   | <a href="mailto:karlhuesgen@ufl.edu">karlhuesgen@ufl.edu</a>                                   | Editor                     | PRE          | University of Florida, College of Medicine, Department of Emergency Medicine                                |
| Meenakshi P. Balakrishnan      | <a href="mailto:meenakshipb@ufl.edu">meenakshipb@ufl.edu</a>                                   | Editor                     | EPH          | University of Florida, College of Medicine, Department of Emergency Medicine                                |
| Muhammad Abdul Baker Chowdhury | <a href="mailto:chowdhurym@ufl.edu">chowdhurym@ufl.edu</a>                                     | Editor                     | EPH          | University of Florida, College of Medicine, Department of Emergency Medicine                                |
| Ramani Balu                    | <a href="mailto:ramani.balu@penncmedicine.upenn.edu">ramani.balu@penncmedicine.upenn.edu</a>   | Editor                     | GL           | University of Pennsylvania, Department of Neurology, Division of Neurocritical Care                         |
| Sarah Gul                      | <a href="mailto:Sarah.Gul@neurosurgery.ufl.edu">Sarah.Gul@neurosurgery.ufl.edu</a>             | Editor                     | BSP          | Yale University, School of Medicine, Department of Surgery                                                  |
| Casey Carr                     | <a href="mailto:caseytercarr@gmail.com">caseytercarr@gmail.com</a>                             | New Reviewer               | PRO          | University of Florida, College of Medicine, Department of Emergency Medicine                                |
| Chantail Ulatowski             | <a href="mailto:c.ulatowski@ufl.edu">c.ulatowski@ufl.edu</a>                                   | New Reviewer               | PRE          | University of Florida, College of Medicine, Department of Emergency Medicine                                |
| Colton B Amaral                | <a href="mailto:colton.amaral@gmail.com">colton.amaral@gmail.com</a>                           | New Reviewer               | BSP          | University of Florida, Alachua County Fire Rescue - Critical Care Division                                  |
| Daniel Buchalter               | <a href="mailto:dbuchalter372351@student.wmcarey.edu">dbuchalter372351@student.wmcarey.edu</a> | Senior Reviewer            | IN           | William Carey University, College of Osteopathic Medicine                                                   |
| Daniel Ralston                 | <a href="mailto:dralston@ufl.edu">dralston@ufl.edu</a>                                         | New Reviewer               | GL           | University of Florida, College of Medicine, Department of Emergency Medicine                                |
| Danielle Roberts               | <a href="mailto:danirobertsmd@gmail.com">danirobertsmd@gmail.com</a>                           | New Reviewer               | PRE          | University of Florida, College of Medicine, Department of Emergency Medicine                                |
| Dru Curtis                     | <a href="mailto:druclutis@ufl.edu">druclutis@ufl.edu</a>                                       | New Reviewer               | IN           | University of Florida                                                                                       |
| Ellen George                   | <a href="mailto:emcngorge@gmail.com">emcngorge@gmail.com</a>                                   | Senior Reviewer            | PED          | University of Florida, College of Medicine, Department of Pediatrics                                        |
| Emmett Martin                  | <a href="mailto:emmett1986@ufl.edu">emmett1986@ufl.edu</a>                                     | New Reviewer               | EPH          | University of Florida, College of Medicine, Department of Emergency Medicine                                |
| Garrett Snipes                 | <a href="mailto:snipesg@ufl.edu">snipesg@ufl.edu</a>                                           | Senior Reviewer            | IN           | University of Florida, College of Medicine, Department of Emergency Medicine                                |
| Jeremy Latimer                 | <a href="mailto:jeremy.latimer@neurology.ufl.edu">jeremy.latimer@neurology.ufl.edu</a>         | New Reviewer               | BSP          | University of Florida, College of Medicine, Department of Neurocritical Care                                |
| A. Jessica Pinto               | <a href="mailto:ajessica.pinto@ufl.edu">ajessica.pinto@ufl.edu</a>                             | New Reviewer               | PRO          | University of Florida, College of Medicine, Department of Emergency Medicine                                |
| John Dollerschell              | <a href="mailto:jdollerschell@anest.ufl.edu">jdollerschell@anest.ufl.edu</a>                   | Senior Reviewer            | GL           | University of Florida, College of Medicine, Department of Anesthesiology                                    |
| Jon Wiese                      | <a href="mailto:jonwiese@ufl.edu">jonwiese@ufl.edu</a>                                         | New Reviewer               | EPH          | University of Florida                                                                                       |
| Kathryn Dasburg                | <a href="mailto:kdasburg@ufl.edu">kdasburg@ufl.edu</a>                                         | New Reviewer               | IN           | University of Florida, College of Medicine, Department of Emergency Medicine                                |
| Kayvon Yazdanbakhsh            | <a href="mailto:kayvonyazdan@gmail.com">kayvonyazdan@gmail.com</a>                             | Senior Reviewer            | PRE          | Melrose Fire Rescue Department                                                                              |
| Manjiri Tule                   | <a href="mailto:mtule@ufl.edu">mtule@ufl.edu</a>                                               | Senior Reviewer            | PED          | University of Florida, College of Medicine, Department of Pediatrics                                        |
| Maria Echavarria               | <a href="mailto:mechavarria@ufl.edu">mechavarria@ufl.edu</a>                                   | Senior Reviewer            | PED          | University of Florida, College of Medicine, Department of Pediatrics                                        |
| Marie Nader                    | <a href="mailto:mnader@ufl.edu">mnader@ufl.edu</a>                                             | New Reviewer               | PED          | Yale University, School of Medicine, Section of Pediatric Critical Care Medicine, Department of Pediatrics, |
| Meghan Bowser                  | <a href="mailto:mbowser1@ufl.edu">mbowser1@ufl.edu</a>                                         | New Reviewer               | PED          | University of Florida, College of Medicine, Department of Pediatrics                                        |
| Morgan William Carson-Marino   | <a href="mailto:mwcarmino@ufl.edu">mwcarmino@ufl.edu</a>                                       | Senior Reviewer            | BSP          | University of Florida, College of Pharmacy, Department of Pharmacotherapy and Translational Research        |
| Robert Cueto                   | <a href="mailto:cuetorobertj@ufl.edu">cuetorobertj@ufl.edu</a>                                 | New Reviewer               | PRE          | University of Florida, College of Medicine, Department of Emergency Medicine                                |
| Robert Leverage                | <a href="mailto:robert.leverage@mybcom.org">robert.leverage@mybcom.org</a>                     | New Reviewer               | IN           | New Mexico State University, Burrell College of Osteopathic Medicine                                        |
| Sabuj Chandra Bhowmick         | <a href="mailto:Sabuj606@gmail.com">Sabuj606@gmail.com</a>                                     | Senior Reviewer            | EPH          | University of Oslo, Department of Mathematics and Statistics                                                |
| Sara Kim                       | <a href="mailto:sara.kim@ufl.edu">sara.kim@ufl.edu</a>                                         | New Reviewer               | PED          | University of Florida, College of Medicine, Department of Pediatrics                                        |
| Shannon Williams               | <a href="mailto:sjwilliams@ufl.edu">sjwilliams@ufl.edu</a>                                     | New Reviewer               | PRO          | University of Florida, College of Medicine, Department of Emergency Medicine                                |
| Sonya E Zhou                   | <a href="mailto:sonya.zhou@yale.edu">sonya.zhou@yale.edu</a>                                   | Senior Reviewer            | PRO          | Yale University, School of Medicine, Department of Neurology                                                |
| Terri Davis                    | <a href="mailto:davist@ufl.edu">davist@ufl.edu</a>                                             | Senior Reviewer            | PRE          | University of Florida, College of Medicine, Department of Emergency Medicine                                |
| Thomas King                    | <a href="mailto:thomascking@ufl.edu">thomascking@ufl.edu</a>                                   | New Reviewer               | PRO          | University of Florida                                                                                       |
| Yasmeen O. Elmelige            | <a href="mailto:yelmelige@ufl.edu">yelmelige@ufl.edu</a>                                       | Senior Reviewer            | EPH          | University of Florida, College of Medicine, Department of Emergency Medicine                                |
